# Supplementary material for: MicroRNA 144 Impairs Insulin Signaling by Inhibiting the Expression of Insulin Receptor Substrate 1 in Type 2 Diabetes Mellitus
Source: PLOS journal article supplement (doi:10.1371/journal.pone.0022839), 2011-08-01

**S5: Pearson correlation scatter plot of miRNA expressions (BatchA).** (A). miRNA profiles of IFG patients do not correlate strongly to those of CTL at  $R=0.78$ ; in white circles while (B). the miRNA profiles of T2D patients showed a much weaker correlation to CTL at a further reduced  $R=0.68$ ; in white squares. The scatter plot of ~100 detected miRNAs is drawn to provide a snap shot of the distribution and the correlation between the two variables. Points closely clustered to a straightline indicate a stronger correlation between the variables. The plot shows that IFG and CTL has stronger association than T2D and CTL. CTL, healthy controls; IFG, impaired fasting glucose; T2D, type 2 diabetes.

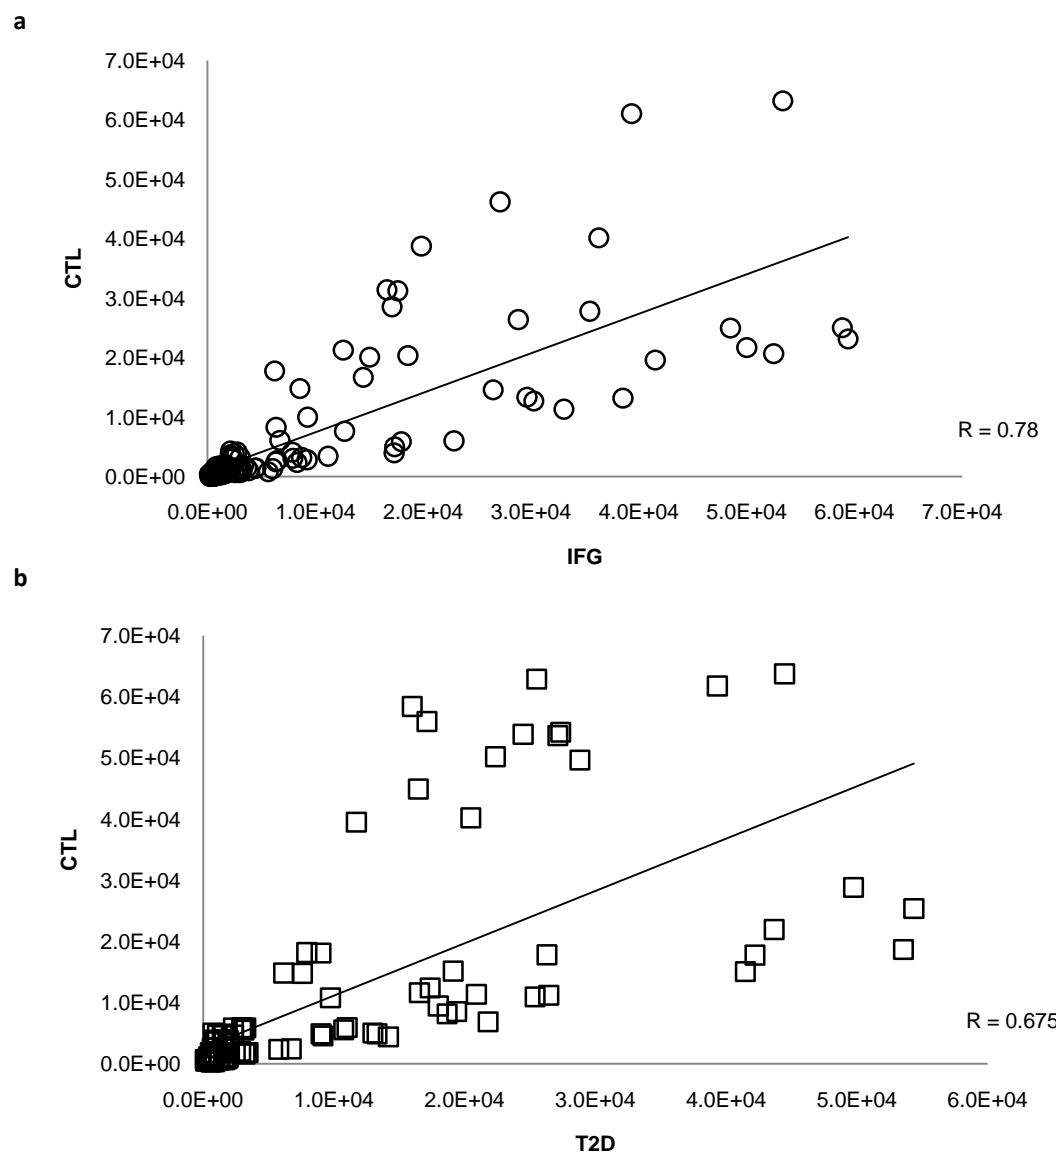

Supplement: S5 (10.1371/journal.pone.0022839.s005) [file journal.pone.0022839.s005]
