# Supplementary material for: MicroRNA 144 Impairs Insulin Signaling by Inhibiting the Expression of Insulin Receptor Substrate 1 in Type 2 Diabetes Mellitus
Source: PLOS journal article supplement (doi:10.1371/journal.pone.0022839), 2011-08-01

**S7: PCA plot of mRNA profiles of IFG and T2D patients (Batch A).** Principal component analysis (PCA) plot based on mRNA expression showed a less distinguished classification of IFG and T2D patients. Batch A patients consists of six IFG patients (labeled as 1IFG to 6IFG) and eight T2D patients (labeled as 1T2D to 8T2D). IFG,impaired fasting glucose; T2D,type 2 diabetes.

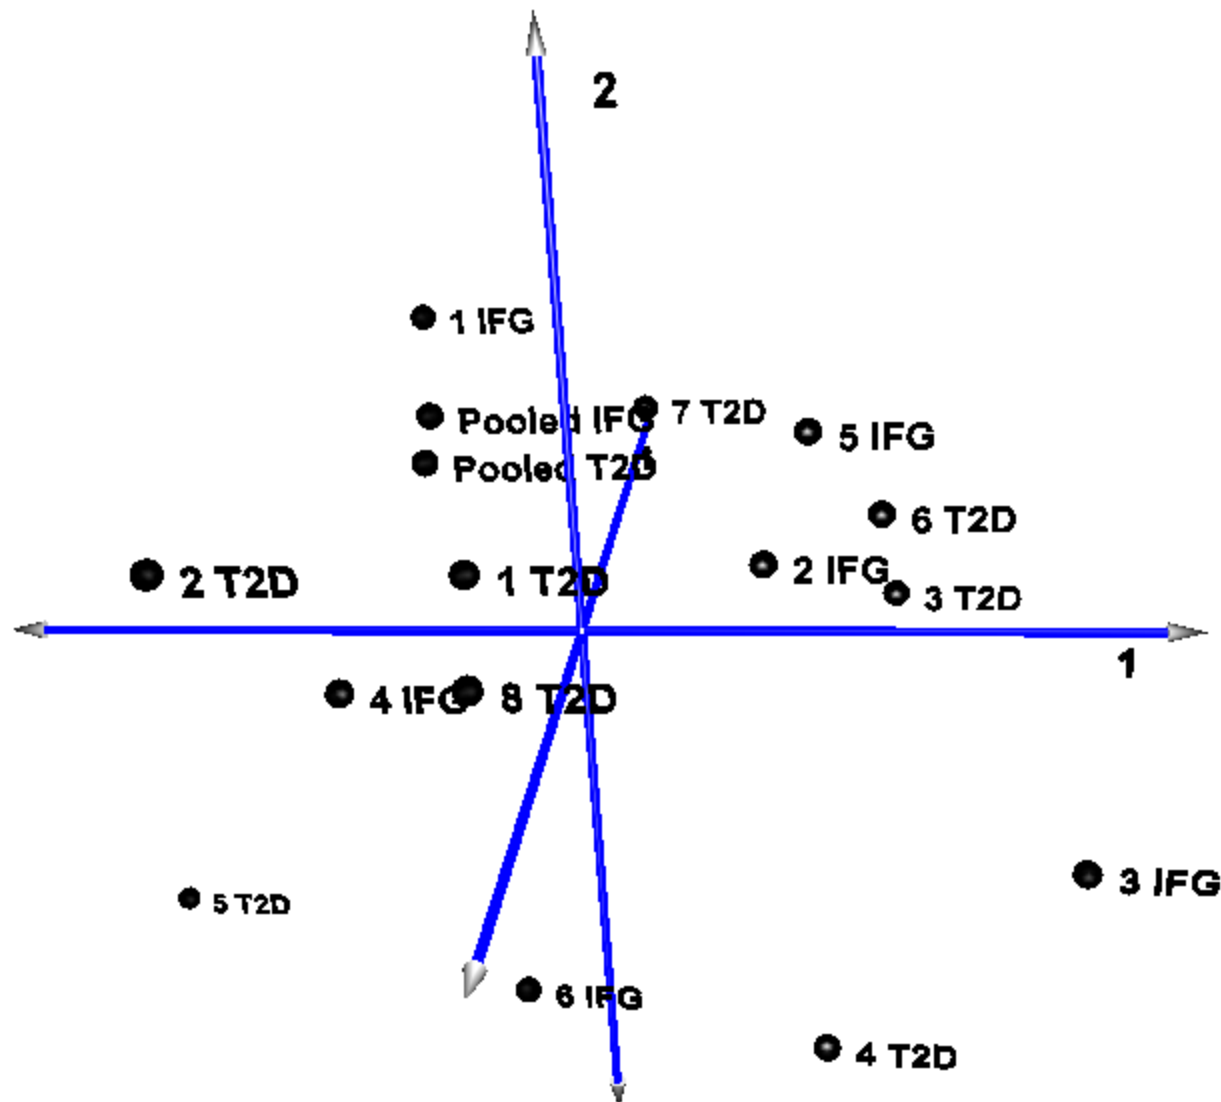

Supplement: S7 (10.1371/journal.pone.0022839.s007) [file journal.pone.0022839.s007]
