# Supplementary material for: MicroRNA 144 Impairs Insulin Signaling by Inhibiting the Expression of Insulin Receptor Substrate 1 in Type 2 Diabetes Mellitus
Source: PLoS One. 2011 Aug 1;6(8):e22839. doi: 10.1371/journal.pone.0022839 (PMC3148231; doi:10.1371/journal.pone.0022839)
Supplement: Table S6 — Table shows mRNA microarray fold change values of IFG or T2D vs healthy control. The values were used to construct the Principal Component Analysis (PCA) plot as in Table S7. Biotin-labelled complementary RNA probes were synthesized with the Illumina TotalPrep RNA Amplification kit (Ambion). Gene profiling was performed with Sentrix BeadChip Array HumanRef-8 v2 (Illumina). Data were analysed with the BeadStudio software. Differentially expressed genes were selected based on the following parameters as suggested by the manufacturer: p value <0.05, Diff score >20, Average signal >100. All array data can be accessed from Gene Expression Omnibus (GEO) with accession no. GSE21321; SuperSeries GSE26168. CTL, healthy controls; IFG, impaired fasting glucose; T2D, type 2 diabetes. (XLS) [file pone.0022839.s006.xls]

## Sheet: Sheet 1
S6: Table shows mRNA microarray fold change values of IFG or T2D vs healthy control. The values were used to construct the Principal Component Analysis (PCA) plot as in Supplemental Figure 1. Biotin-labelled complementary RNA probes were synthesized with the Illumina TotalPrep RNA Amplification kit (Ambion). Gene profiling was performed with Sentrix BeadChip Array HumanRef-8 v2 (Illumina). Data w…
PROBE ID	SYMBOL	1 IFG	2 IFG	3 IFG	4 IFG	5 IFG	6 IFG	Pooled IFG	1 T2D	2 T2D	3 T2D	4 T2D	5 T2D	6 T2D	7 T2D	8 T2D	Pooled T2D
ILMN_1762337	7A5	0.946269	0.853731	0.81791	0.802985	0.919403	0.934328	1.13632	0.876617	0.876617	0.867662	0.778109	0.878607	0.838806	0.917413	0.785075	1.13234
ILMN_2055271	A1BG	1.24378	1.08657	1.05672	1.0408	1.07662	1.21791	1.43284	1.0995	1.14428	1.09851	0.98408	1.18109	1.08557	1.21194	1.29552	1.2995
ILMN_2383229	A1CF	0.947264	1.02488	0.956219	0.98408	0.991045	0.999005	1.14229	0.933333	0.960199	0.900498	0.758209	0.785075	0.81393	0.905473	0.876617	1.28557
ILMN_1806310	A1CF	0.991045	0.932338	0.949254	1.05572	0.912438	0.918408	1.43483	0.99403	1.01493	1.00498	0.771144	1.00995	0.889552	0.80597	0.824876	1.0995
ILMN_1779670	A1CF	1.20995	1.0199	0.898507	1.03582	1.0995	1.07861	1.32836	0.978109	1.00498	0.942289	0.98806	0.981095	0.950249	1.02985	1.08557	1.3403
ILMN_2321282	A26A1	1.07662	1.02289	0.937313	0.959204	1.16119	1.01194	1.36617	0.847761	1.13035	1.04975	0.922388	0.944279	1.01592	0.915423	0.861692	1.24876
ILMN_1772582	A26B1	0.886567	0.8199	0.966169	0.880597	0.874627	0.973134	1.33632	0.907463	0.98408	0.918408	0.912438	0.947264	0.886567	0.893532	0.933333	1.2995
ILMN_1717783	A26C3	0.843781	0.828856	0.757214	0.80995	0.890547	0.897512	1.20199	0.876617	0.874627	0.895522	0.79005	0.965174	0.769154	0.961194	0.831841	1.11642
ILMN_1814316	A2BP1	0.98607	0.890547	0.934328	0.843781	0.871642	0.804975	1.20398	0.890547	0.868657	0.731343	0.731343	0.921393	0.778109	0.800995	0.828856	1.04279
ILMN_2359168	A2BP1	1.03284	0.894527	0.827861	0.914428	0.981095	0.903483	1.3592	0.906468	1.04876	0.869652	0.829851	0.851741	0.868657	0.916418	0.818905	1.03682
ILMN_1731507	A2BP1	0.862687	0.806965	0.804975	0.846766	0.939303	0.80796	1.35821	0.757214	0.758209	0.797015	0.711443	0.767164	0.816915	0.79204	0.850746	1.18209
ILMN_1787689	A2BP1	1.00697	0.895522	0.899502	0.997015	0.961194	0.923383	1.75323	0.916418	1.04776	0.849751	0.942289	1.00299	0.830846	1.10746	0.955224	1.52637
ILMN_1745607	A2M	0.911443	0.775124	0.79403	0.981095	0.938308	0.851741	1.24279	0.820896	0.887562	0.871642	0.852736	0.781095	0.810945	0.787065	0.888557	1.11841
ILMN_2136495	A2ML1	0.920398	0.847761	0.944279	0.896517	0.941294	0.935323	0.964179	0.853731	0.934328	0.939303	0.865672	0.977114	0.871642	0.948259	0.848756	1.18607
ILMN_1668111	A3GALT2	1.01393	0.949254	0.821891	0.874627	0.870647	0.781095	1.15423	0.80796	0.827861	0.772139	0.767164	0.942289	0.768159	0.834826	0.812935	1.13134
ILMN_2295559	A3GALT2	0.952239	0.917413	0.910448	0.934328	0.989055	0.964179	1.22488	0.916418	0.903483	1.04478	0.852736	0.924378	0.80199	0.864677	0.976119	1.08557
ILMN_1735045	A4GALT	0.933333	1.00796	0.916418	0.860697	0.954229	0.887562	1.15025	0.899502	0.972139	0.892537	0.841791	0.918408	0.770149	0.863682	0.892537	1.2199
ILMN_1680754	A4GNT	1.01592	1.01891	1.05174	1.03085	1.00498	0.972139	1.78706	1.02886	0.979104	1.03483	0.840796	1.06866	1.04378	1.04478	0.915423	1.60498
ILMN_2375184	AAA1	1.01493	0.967164	1.02886	1.12537	1.0209	1.01891	1.27761	0.972139	0.969154	0.966169	0.885572	0.940299	0.908458	0.99204	0.853731	0.976119
ILMN_1659452	AAA1	1.02687	1.00796	1.01294	1.04776	1.06468	1.04975	1.53035	0.958209	1.06766	1.01294	0.960199	1.01194	0.806965	0.973134	0.967164	1.35821
ILMN_1767388	AAA1	1.04975	1.26269	1.02886	1.07065	1.13134	1.11642	1.14627	1.0607	1.06667	0.969154	0.853731	0.947264	0.960199	1.01592	1.02289	1.39602
ILMN_1675204	AAA1	0.785075	0.758209	0.769154	0.824876	0.743284	0.695522	1.1194	0.866667	0.709453	0.772139	0.731343	0.737313	0.718408	0.881592	0.806965	1.09453
ILMN_1673870	AAA1	0.906468	0.78607	0.883582	0.820896	0.900498	0.838806	1.32139	0.899502	0.871642	0.858706	0.816915	0.866667	0.758209	0.867662	0.821891	1.08159
ILMN_1755321	AAAS	1.43483	1.28458	1.05373	1.43483	1.23284	1.28955	1.51343	1.29453	1.34925	1.18507	1.21194	1.39403	1.21194	1.25771	1.26866	1.49154
ILMN_1698554	AACS	1.58308	1.60199	1.44279	1.4607	1.71642	1.56517	2.38706	1.44876	1.45373	1.401	1.35124	1.78209	1.41791	1.60398	1.38507	2.33532
ILMN_1760414	AADAC	0.926368	1.01592	0.884577	0.959204	1.00597	0.968159	1.26567	0.971144	1.00199	0.871642	0.939303	0.909453	0.836816	0.940299	0.843781	1.06866
ILMN_2061446	AADACL1	1.83582	1.51144	1.2	1.37413	1.48955	1.7602	2.09552	1.41493	1.41891	1.5791	1.24279	1.80199	1.37811	1.63085	1.4597	2.03881
ILMN_1752884	AADACL2	1.04876	0.931343	0.897512	0.913433	0.926368	0.882587	1.09254	0.952239	0.849751	0.945274	0.824876	0.946269	0.845771	0.974129	0.922388	1.16219
ILMN_1668851	AADACL4	1.03383	0.917413	1.35124	0.912438	0.911443	0.916418	1.47861	1.38507	0.841791	1.04179	0.948259	0.867662	0.974129	0.948259	0.830846	1.3801
ILMN_2270015	AADAT	0.99602	1.02189	0.901493	1.02985	1.0806	1.16318	1.07662	0.99005	1.00995	1.05473	0.79005	1.01592	0.922388	1.10249	0.970149	1.36318
ILMN_1809959	AADAT	0.890547	0.958209	0.935323	0.878607	0.896517	0.873632	1.31045	0.881592	0.854726	0.936318	0.763184	0.948259	0.820896	0.80995	0.854726	1.22587
ILMN_2357031	AADAT	1.09652	0.907463	0.880597	0.920398	0.915423	0.901493	1.20498	0.842786	0.750249	0.850746	0.683582	0.963184	0.78806	0.901493	0.827861	1.14527
ILMN_1688755	AAK1	2.90746	2.39204	1.51343	2.07861	1.89851	2.47463	1.76617	2.69652	3.93234	1.76816	2.28856	4.03682	2.31542	2.92239	2.37711	1.93532
ILMN_1689211	AAK1	0.957214	0.893532	0.910448	0.866667	0.995025	0.907463	1.10149	0.977114	0.891542	1.02886	0.869652	0.910448	0.856716	0.915423	0.938308	1.04279
ILMN_1653165	AAMP	2.64179	2.23881	1.45572	2.24876	2.08159	2.2597	3.29055	2.38109	2.44677	1.90846	1.61095	2.2	1.61194	2.26667	1.9194	2.98905
ILMN_1729835	AANAT	0.885572	0.963184	0.848756	0.841791	0.905473	0.862687	1.17413	0.874627	0.824876	0.881592	0.7801	0.894527	0.79602	0.851741	0.824876	1.09055
ILMN_1662364	AARS	10.591	9.69751	4.5602	11.3632	8.64478	10.7065	8.88358	8.40597	11.7831	6.31542	8.44876	14.1095	7.59403	7.7602	9.37811	9.22985
ILMN_1674698	AARS2	1.55721	1.66965	1.12338	1.92736	1.60398	1.65274	2.28955	1.62488	2.11443	1.11841	1.44179	1.55721	1.5403	1.46667	1.70945	1.94129
ILMN_1700461	AARSD1	2.28159	2.55025	1.33632	2.25473	2.05572	2.00199	2.95622	2.83085	3.0398	1.73831	2.04975	2.98607	2.21891	2.08955	2.59005	2.67761
ILMN_1784269	AASDH	2.23582	1.65274	1.23881	2.42786	1.87065	2.16617	2.18905	2.37114	2.30249	1.43781	1.79303	2.9592	1.82587	1.78408	2.11741	2.07761
ILMN_2096191	AASDHPPT	2.79104	1.51841	1.3602	2.61891	1.77711	2.5005	2.001	1.77512	2.12935	1.65174	1.65572	3.5393	1.70846	1.74527	1.93831	1.94726
ILMN_2157219	AASS	1.2806	1.0209	1.00896	1.09055	1.00896	1.00199	1.24378	1.09552	1.08557	0.908458	0.918408	0.970149	0.917413	1.00498	0.913433	1.31343
ILMN_1703743	AATF	10.4378	10.2577	6.52537	7.62687	8.72239	9.33532	9.89851	8.01393	10.008	7.28955	8.5005	10.8776	7.11642	9.01592	7.41095	8.72836
ILMN_1687609	AATK	1.68358	1.49254	1.21393	1.17214	1.61294	1.32438	2.33333	1.45572	1.43781	1.35323	1.27761	1.21891	1.21891	1.58308	1.19303	2.07363
ILMN_2068874	AATK	0.950249	0.884577	0.928358	0.892537	0.938308	0.853731	1.11244	0.851741	0.943284	0.79005	0.873632	0.958209	0.78408	0.910448	0.902488	1.03682
ILMN_1670117	ABAT	1.0199	0.869652	0.98806	0.804975	0.843781	1.14627	1.34627	0.978109	0.940299	0.971144	0.812935	1.04876	0.878607	0.918408	0.909453	1.399
ILMN_1805104	ABAT	1.16418	1.02488	0.946269	1.18408	1.06269	1.26468	2.3602	1.02189	1.13035	1.17512	0.944279	1.12736	0.897512	1.1592	0.836816	1.85473
ILMN_2404407	ABAT	1.06269	0.918408	0.919403	1.19701	0.985075	0.999005	1.09254	0.962189	0.889552	0.866667	1.08358	1.21592	0.899502	0.964179	1.03682	1.12736
ILMN_1766054	ABCA1	6.48557	4.97015	3.05771	8.17214	4.11343	3.75622	8.58408	7.30746	5.27065	5.34229	5.2199	11.2418	9.59104	10.5493	3.78507	10.992
ILMN_2070570	ABCA10	0.899502	0.910448	0.942289	0.961194	0.898507	0.903483	1.19801	0.915423	0.892537	0.874627	0.81791	0.935323	0.844776	0.991045	0.899502	1.09751
ILMN_2232084	ABCA11	1.05871	0.863682	1.01194	1.02985	1.03383	1.05075	1.34428	0.99204	1.0398	0.931343	0.865672	1.08458	0.981095	0.931343	0.989055	1.08856
ILMN_1750250	ABCA12	0.959204	0.955224	1.01592	1.04776	1.08458	0.925373	1.4607	0.917413	0.863682	0.874627	0.904478	1.01294	0.977114	0.833831	0.849751	1.12139
ILMN_2361400	ABCA12	1.14726	0.974129	0.968159	1.00597	0.99602	0.969154	1.71443	1.05174	0.968159	0.844776	0.846766	1.10249	0.904478	0.913433	0.974129	1.66866
ILMN_1704579	ABCA13	0.825871	1.19204	1.11642	0.861692	0.933333	1.0796	1.20995	0.857711	1.38706	0.976119	0.983085	1.30149	0.907463	1.00796	1.35622	1.02587
ILMN_1687636	ABCA2	1.09652	1.03881	1.03781	1.0398	1.08657	1.07264	1.50348	1.14229	1.1592	1.00995	0.886567	1.06766	0.874627	0.950249	1.09055	1.25473
ILMN_1747627	ABCA2	1.84179	1.70149	1.1801	1.35622	1.72935	1.42289	2.16318	1.21791	1.58109	1.37214	1.63284	1.65672	1.34527	1.31343	1.36816	1.90746
ILMN_1758523	ABCA3	1.27463	1.29353	1.09652	1.18308	1.08955	1.21592	1.31542	1.01592	1.22189	1.12338	1.24478	1.30547	1.02587	0.954229	1.13433	1.3005
ILMN_1794965	ABCA4	1.33532	1.22587	1.16119	1.15124	1.22985	1.19303	1.79801	1.30746	1.21692	1.23184	1.21294	1.31144	1.15721	1.26766	1.29552	1.64876
ILMN_1722286	ABCA5	0.99403	1.05075	0.965174	1.07065	1.08955	1.02886	1.83085	1.00896	0.947264	0.877612	0.781095	1.00597	0.944279	0.979104	0.936318	1.54527
ILMN_1784176	ABCA5	0.900498	0.98209	0.872637	0.963184	0.937313	0.976119	1.28856	1.0597	0.936318	0.914428	0.930348	1.0209	0.737313	0.936318	0.879602	1.28358
ILMN_1749001	ABCA5	1.05473	0.939303	0.931343	1.04179	0.969154	1.05174	1.54826	0.956219	0.846766	0.862687	0.827861	1.14925	0.875622	0.899502	0.939303	1.33234
ILMN_1701551	ABCA6	1.02189	0.933333	0.917413	0.962189	0.864677	1.04179	1.1403	0.882587	0.878607	0.824876	0.781095	0.930348	0.818905	0.921393	0.939303	1.07761
ILMN_1795507	ABCA6	1.14925	1.0398	1.13134	1.20697	1.20697	1.13532	1.30348	1.14328	1.08657	1.07662	0.962189	1.06269	0.99602	1.10547	1.10945	1.30647
ILMN_1729894	ABCA7	0.850746	0.848756	0.853731	0.857711	0.898507	0.80796	1.35622	0.868657	0.915423	0.872637	0.719403	0.873632	0.863682	0.808955	0.971144	1.11045
ILMN_1743205	ABCA7	6.72736	8.40896	3.84876	5.5791	6.63383	3.66368	5.91741	6.31741	10.9572	4.26667	12.4418	12.7781	4.38308	5.46866	6.85274	7.21294
ILMN_2259319	ABCA7	0.99204	1.01592	0.944279	0.939303	0.971144	1.03284	1.02886	0.944279	0.995025	0.905473	0.889552	0.98209	0.884577	0.98806	0.952239	0.962189
ILMN_2129886	ABCA8	0.975124	0.892537	0.892537	0.914428	0.849751	0.978109	1.25373	0.79801	0.856716	0.864677	0.771144	0.80995	0.761194	0.928358	0.842786	1.18706
ILMN_1720501	ABCA9	1.0995	1.06965	1.06866	1.31542	1.11542	1.52239	1.85871	1.10647	1.01891	1.03284	0.892537	1.10846	0.968159	1.10249	0.943284	1.41891
ILMN_1668446	ABCA9	1.00597	0.927363	0.902488	0.98607	0.936318	0.932338	1.59701	0.873632	0.779104	0.79403	0.704478	1.00796	0.907463	0.876617	0.81393	1.42786
ILMN_2094875	ABCB1	1.38806	1.15522	0.923383	1.18408	1.22289	1.29851	1.71045	1.04677	1.03184	1.20697	1.399	2.11144	1.10547	1.56318	1.33532	1.44677
ILMN_1665730	ABCB10	1.8	1.26866	1.37413	2.35025	1.50149	2.14328	2.71642	1.64975	1.7791	1.30448	1.56119	2.66468	1.55721	1.5194	1.52239	2.3204
ILMN_2232066	ABCB11	0.995025	1.01493	0.991045	1.03184	1.07264	0.959204	1.05771	1.05672	1.02587	0.934328	1.05373	1.02687	0.893532	1.05672	1.06368	1.07164
ILMN_1767349	ABCB4	1.17413	1.06269	0.922388	1.0209	0.938308	0.957214	1.29055	0.962189	0.938308	1.00398	0.869652	1.02886	0.908458	0.888557	0.858706	1.29751
ILMN_1658257	ABCB5	0.875622	0.850746	0.887562	0.834826	0.955224	0.902488	0.961194	0.909453	0.893532	0.854726	0.736318	0.871642	0.910448	0.759204	0.8199	1.06269
ILMN_2193980	ABCB6	1.55323	1.30846	1.34328	1.29453	1.31343	1.30448	1.75323	1.47861	1.60697	1.32338	1.25174	2.32736	1.27463	1.51045	1.4	1.92338
ILMN_1687840	ABCB7	2.34229	1.62886	1.28159	2.06567	1.9005	2.17313	2.61095	2.17811	2.31443	1.50945	1.50149	2.58806	1.78706	2.16119	1.91542	2.3791
ILMN_2102422	ABCB8	1.12935	1.27662	1.01194	1.0796	1.02786	0.975124	1.25075	1.01791	1.17512	0.995025	0.985075	1.19303	1.001	0.937313	1.001	1.26667
ILMN_1788928	ABCB9	0.947264	0.888557	1.03582	0.906468	0.983085	0.968159	1.20697	0.939303	0.913433	0.935323	0.730348	0.893532	0.912438	0.872637	0.920398	1.05473
ILMN_2343047	ABCB9	1.26169	1.14726	1.03781	1.04179	1.14129	1.06567	1.44179	1.24179	1.84577	0.993035	1.17512	1.32637	1.04975	1.11045	1.18806	1.46667
ILMN_2343048	ABCB9	1.69851	1.34627	1.05672	1.24677	1.22488	1.1602	1.59502	1.51045	2.1592	1.36816	1.46368	1.47264	1.20299	1.32338	1.25572	1.68259
ILMN_2335302	ABCC1	0.960199	0.973134	0.937313	0.956219	0.933333	0.945274	1.14428	1.0209	0.937313	0.899502	0.893532	0.924378	0.837811	0.920398	0.890547	1.11045
ILMN_1802404	ABCC1	1.2995	1.09055	1.1403	1.13234	1.26269	1.35721	1.34627	1.12836	1.38806	1.25174	1.17413	1.58806	1.22289	1.17114	1.2607	1.201
ILMN_1776119	ABCC10	1.46965	1.14925	1.08358	1.33433	1.49751	1.40896	2.44279	1.46766	1.69055	1.24577	1.26368	1.52139	1.21194	1.22786	1.31642	1.93035
ILMN_2358714	ABCC11	0.848756	0.778109	0.761194	0.78209	0.927363	0.910448	1.03284	0.79602	0.831841	0.951244	0.764179	0.888557	0.849751	0.900498	0.828856	0.952239
ILMN_1732140	ABCC11	1.28159	1.10149	0.99403	1.10448	1.18905	0.99005	1.23085	1.0796	1.04776	1.03582	0.98408	1.12935	0.938308	0.922388	0.941294	1.24478
ILMN_1713008	ABCC11	1.0209	0.968159	1.0796	0.999005	1.03881	1.08458	1.12338	0.968159	0.993035	1.04776	0.876617	1.10348	0.970149	1.01493	0.99005	1.08856
ILMN_1762093	ABCC12	1.23184	1.01393	0.899502	1.05672	0.99403	0.99204	1.27662	1.08557	1.12338	0.98607	0.944279	1.05871	0.849751	0.976119	1.13035	1.37413
ILMN_1709092	ABCC13	2.09652	1.93731	2.45075	1.72935	1.92537	2.2398	2.47264	2.17612	2.23383	2.46965	1.36915	5.65672	1.77811	1.80299	1.79502	2.46766
ILMN_1774344	ABCC13	1.20697	1.16219	1.17214	1.14129	1.11045	1.10149	1.30547	1.15323	1.19005	1.15025	0.951244	1.12836	1.01294	1.14627	1.09453	1.27861
ILMN_1676278	ABCC2	1.34925	1.13035	1.12935	1.25274	1.11244	1.05174	1.36219	1.06766	1.22985	0.99801	0.983085	1.45473	1.10846	0.958209	1.19502	1.15522
ILMN_1677814	ABCC3	4.89254	5.40995	6.86667	5.92537	4.24378	4.55224	7.50448	4.92338	9.31741	6.91343	4.7403	5.14627	4.49353	6.4796	9.15721	6.89552
ILMN_2194009	ABCC4	1.5005	1.24478	1.31244	1.31642	1.21294	1.66468	1.7194	1.81692	1.22985	1.49353	0.99602	1.86965	1.01891	1.30647	1.69154	1.53234
ILMN_2302358	ABCC5	1.00299	0.929353	0.873632	1.03881	0.917413	0.927363	0.981095	0.935323	0.773134	0.762189	0.79204	1.06766	0.908458	0.924378	0.856716	0.958209
ILMN_1706531	ABCC5	2.94925	3.40796	2.38408	4.30249	3.50149	3.52836	3.29652	3.70945	3.8199	2.56219	3.57214	5.64179	2.10746	4.12537	3.02289	3.3592
ILMN_1651964	ABCC5	2.24975	2.10448	1.68657	2.58209	2.46468	2.32637	3.05871	2.61393	2.06667	2.001	2.35224	3.97512	1.72736	2.37512	1.90547	2.89851
ILMN_1778352	ABCC6	1.08657	1.04876	0.850746	0.960199	1.08458	0.916418	1.61393	0.960199	0.871642	0.849751	0.81194	0.911443	0.839801	0.985075	0.860697	1.15224
ILMN_1725414	ABCC6	1.21791	1.04378	0.930348	1.16318	1.2607	1.0806	2.62189	1.04378	1.01891	1.03483	0.99005	1.11841	0.874627	0.977114	0.917413	2.48358
ILMN_2293902	ABCC6	0.943284	0.816915	0.770149	0.808955	0.875622	0.797015	0.957214	0.836816	0.833831	0.847761	0.749254	0.868657	0.724378	0.80796	0.746269	0.979104
ILMN_1801521	ABCC6	0.884577	0.930348	0.891542	0.943284	0.947264	0.875622	1.58706	0.814925	0.851741	0.826866	0.793035	0.955224	0.818905	0.823881	0.914428	1.32139
ILMN_2406654	ABCC6	1.13134	1.05075	1.11045	1.15124	1.03582	1.04279	1.24776	1.13433	0.946269	1.0597	0.957214	1.12139	1.02488	1.0796	0.937313	1.28955
ILMN_1767129	ABCC8	0.938308	0.951244	0.875622	0.895522	0.985075	0.937313	1.21194	0.948259	0.870647	0.833831	0.867662	0.880597	0.81592	0.935323	0.81791	1.03284
ILMN_1751453	ABCC9	0.928358	0.848756	0.966169	0.932338	0.922388	0.903483	1.13831	0.920398	0.939303	0.901493	0.919403	0.894527	0.917413	0.79602	0.864677	1.12935
ILMN_2366473	ABCC9	1.14826	1.09552	1.04975	1.06269	1.14627	1.04279	1.76517	1.05075	1.02786	1.01692	0.867662	1.14627	1.199	1.18308	1.05075	1.72537
ILMN_1772189	ABCD1	2.32836	2.23284	1.27761	1.60995	1.77512	1.51841	2.401	2.08358	2.14129	1.61692	1.70746	1.95622	1.8398	1.94129	1.74129	2.47761
ILMN_2198897	ABCD2	0.926368	0.891542	0.907463	0.864677	0.957214	0.927363	1.25871	0.863682	0.856716	0.851741	0.842786	0.883582	0.761194	0.901493	0.844776	0.967164
ILMN_2343917	ABCD4	1.09552	0.976119	0.927363	1.07264	1.06567	1.06866	1.28557	0.921393	0.914428	1.02488	0.879602	1.0607	0.935323	0.959204	0.943284	1.19303
ILMN_1651501	ABCD4	1.17711	1.16617	1.1403	1.21194	1.24677	1.17811	1.35622	1.19303	1.1592	1.24577	0.989055	1.18507	1.00199	1.0607	1.12338	1.29154
ILMN_2330267	ABCE1	3.10348	1.79701	1.27662	2.62388	2.26866	2.2408	2.86965	2.34328	2.67761	1.69055	2.08657	3.84577	2.24478	2.24677	2.09851	2.88557
ILMN_1676846	ABCE1	2.7204	2.33632	1.32736	2.45174	2.1005	2.15025	3.00199	2.71741	2.64776	1.58308	1.999	3.60299	2.31642	2.34925	2.4796	2.80498
ILMN_2392635	ABCF1	5.91642	6.56716	2.22587	4.16119	4.94328	3.30746	4.73134	5.48557	6.76716	3.41692	5.21592	7.15622	4.20398	5.44179	5.12637	4.49751
ILMN_1763875	ABCF1	12.4816	11.0269	4.55522	9.56219	9.94328	10.5552	11.0955	11.8965	14.5204	7.79801	10.1423	14.0955	9.55821	10.7323	9.9592	10.7602
ILMN_2284941	ABCF2	1.26965	1.11343	0.816915	0.978109	1.03085	1.30846	1.2199	1.33433	1.27164	1.04975	1.18209	1.36816	1.10149	1.13731	1.30348	1.23881
ILMN_1781999	ABCF2	2.68955	2.26866	1.52537	2.14129	2.1791	2.55323	2.43483	1.76816	2.21294	2.12338	2.52338	3.33532	2.30945	2.36318	2.05274	2.23881
ILMN_1669201	ABCF2	1.36517	1.2995	0.925373	1.0597	1.21891	1.0209	1.93632	1.28756	1.27065	0.970149	0.930348	1.33831	1.13731	1.21393	1.16119	1.59204
ILMN_1810085	ABCF3	1.87662	1.97015	1.12736	1.54428	1.5403	1.2398	1.92736	1.62886	1.72637	1.16119	1.30448	1.66368	1.15025	1.30249	1.38806	1.9791
ILMN_1658176	ABCG1	1.52438	1.60398	1.56517	1.7204	1.24876	1.76219	2.21891	1.93532	1.76617	1.66866	1.73433	2.08358	1.23085	1.44577	1.51841	2.02786
ILMN_2262362	ABCG1	1.06766	0.922388	1.09055	1.00796	1.11542	1.01791	1.22587	1.03582	0.989055	0.917413	0.858706	0.997015	0.985075	0.985075	0.993035	1.16716
ILMN_1743638	ABCG1	0.985075	0.979104	0.954229	1.16816	1.12338	0.962189	1.67761	1.07662	0.970149	0.989055	1.01692	0.903483	0.917413	0.887562	0.872637	1.34328
ILMN_2329927	ABCG1	2.09453	2.58905	1.47065	1.77811	1.81493	1.81592	1.85771	2.3393	1.88358	2.1791	2.40299	4.76915	2.88259	2.94129	1.38607	2.0408
ILMN_1794782	ABCG1	1.57612	1.57413	1.27363	1.27264	1.41493	1.11741	2.37313	1.47065	1.48259	1.19502	1.22388	2.13731	1.36617	1.34527	1.001	2.69751
ILMN_1695968	ABCG1	1.21891	1.10149	0.967164	0.972139	1.16716	1.02587	1.86169	1.00498	1.10249	1	0.886567	1.07463	1.20498	1.0398	0.974129	1.79602
ILMN_1789641	ABCG2	0.9801	0.866667	0.866667	0.894527	0.9801	0.81791	1.42985	0.883582	0.872637	0.871642	0.929353	0.8	0.741294	0.825871	0.893532	1.1005
ILMN_1779470	ABCG4	1.06866	1.1204	0.923383	0.955224	1.03582	0.955224	1.10945	0.911443	0.841791	0.98806	1.05274	1.00597	0.900498	1.02886	0.962189	1.12736
ILMN_1716592	ABCG5	1.05473	1.02587	1.01692	1.01393	1.23881	1.02985	1.42886	1.1393	0.947264	1	1.04776	1.05075	0.938308	1.04876	1.05572	1.41791
ILMN_1680309	ABCG8	1.04179	0.955224	0.955224	0.921393	0.943284	1.00199	1.20995	0.969154	1.05771	0.896517	0.839801	0.897512	0.886567	0.976119	0.940299	1.14527
ILMN_1743371	ABHD1	1.03781	0.888557	0.902488	0.883582	1.05871	0.972139	1.70647	0.922388	1.02289	0.930348	0.78607	0.883582	0.886567	0.908458	0.857711	1.41592
ILMN_1770031	ABHD10	2.53731	2.49154	1.5801	2.52139	2.41692	1.84677	2.65771	2.73234	2.60697	1.88756	1.79005	2.71443	1.62289	2.18905	2.00498	2.81393
ILMN_2338268	ABHD11	1.03881	0.913433	1.02985	1.23184	1.001	1.07861	1.44677	0.855721	1.03284	0.974129	0.927363	1.30249	0.860697	0.930348	0.965174	1.23781
ILMN_1753912	ABHD11	0.949254	0.859701	0.787065	0.960199	0.822886	0.955224	1.20697	0.883582	0.887562	0.877612	0.871642	0.846766	0.783085	0.831841	0.894527	1.07562
ILMN_1737475	ABHD11	1.04677	0.814925	0.915423	1.18209	1.06468	1.201	1.22488	0.857711	0.890547	0.885572	0.914428	1.35721	1.07264	0.748259	0.954229	1.17313
ILMN_1745116	ABHD12	1.15323	1.12736	1.11443	1.18806	1.09453	1.22587	1.37114	1.00796	1.08458	1.08159	0.907463	1.13134	0.941294	1.05075	0.993035	1.36318
ILMN_2318685	ABHD12	1.3005	1.3602	1.00896	1.29254	1.4995	1.35721	1.55224	1.31841	1.399	1.27861	1.25871	1.29552	1.47264	1.21891	1.38607	1.41891
ILMN_2245305	ABHD12	2.19204	2.24876	1.45572	2.1791	2.17313	1.78507	2.07463	2.0806	2.72836	1.84677	1.87861	2.00896	1.8199	2.03781	1.80597	1.96517
ILMN_1698311	ABHD12B	1.02786	0.930348	1.00398	1.13532	0.958209	0.960199	1.29652	1.00796	0.948259	1.10448	0.983085	1.04179	0.876617	0.972139	0.955224	1.3592
ILMN_2367487	ABHD12B	0.853731	0.935323	0.921393	0.962189	0.98607	0.910448	1.16219	0.914428	0.923383	0.879602	0.8	0.821891	0.874627	0.887562	0.876617	1.02687
ILMN_2073969	ABHD13	0.971144	0.928358	0.846766	0.857711	0.940299	0.925373	1.10846	0.826866	0.828856	0.857711	0.827861	0.905473	0.808955	0.880597	0.831841	1.18209
ILMN_1794213	ABHD14A	3.75323	3.08358	1.6398	3.00796	3.21294	2.30547	3.73134	2.48955	2.83184	2.16915	2.43184	2.93433	2.5592	2.73632	2.54527	3.51244
ILMN_2227533	ABHD14B	2.62786	2.74527	1.48557	1.55622	2.36716	1.90945	2.40398	3.18507	3.09552	1.8398	1.48955	1.81692	2.10746	2.38706	2.21692	2.2607
ILMN_2403446	ABHD2	2.34726	2.00697	1.8398	1.79303	1.77413	1.97811	2.61393	1.57114	1.92438	2.26468	1.66169	2.68856	1.62985	1.97612	1.43582	2.51443
ILMN_1787618	ABHD2	0.887562	0.891542	0.821891	0.734328	0.912438	0.947264	1.26468	0.938308	0.895522	0.921393	0.78209	0.854726	0.791045	0.860697	0.863682	1.11443
ILMN_1723662	ABHD2	1.8209	1.39801	1.55124	1.29552	1.31642	1.59204	3.16716	1.08557	1.30448	1.40597	1.31144	1.93831	1.31542	1.49353	1.27363	2.74925
ILMN_1801767	ABHD3	6.25075	2.29851	3.03184	7.34726	2.81493	7.13234	3.87761	2.59701	3.22786	3.97612	3.90547	10.9274	4.3005	3.82488	3.35124	3.26965
ILMN_1700633	ABHD4	2.29453	2.37313	1.70647	1.59502	1.93333	2.0806	2.2796	1.93433	2.17214	1.91244	2.10647	3.54527	1.67065	2.48657	1.75721	2.27662
ILMN_1655702	ABHD5	4.62886	3.0398	3.6607	4.25473	3.73632	5.4	6.50647	2.80398	3.22388	3.56418	5.11642	11.5532	2.81294	4.80498	3.39801	5.57114
ILMN_1706344	ABHD6	1.76219	1.62886	1.42886	1.66269	1.66965	1.46866	2.20796	1.81493	1.93035	1.22488	1.06866	1.77114	1.55124	1.51144	1.40995	2.08458
ILMN_1719498	ABHD7	1.17711	0.905473	1.00697	1.01592	1.04876	1.02189	2.98408	1.02886	1.21095	0.872637	0.878607	0.978109	0.936318	1.10647	0.912438	2.19801
ILMN_1712707	ABHD8	4.03483	3.84279	2.21095	3.40697	2.87264	4.1403	3.58905	3.03085	4.24776	2.92239	3.13532	5.34726	2.79204	3.12338	3.44378	3.6398
ILMN_1699750	ABHD9	1.26468	1.12637	1.08159	1.19204	1.33035	1.1791	1.52537	1.00597	1.12637	1.12338	0.999005	1.09552	1.09254	1.08259	1	1.3801
ILMN_1739081	ABI1	0.99403	0.974129	0.944279	0.945274	1.10249	1.01095	1.30846	0.915423	0.941294	0.954229	0.851741	0.99204	0.976119	0.951244	0.99204	1.39204
ILMN_2329958	ABI1	5.08955	2.83085	3.18209	4.21194	3.14826	4.7602	5.74527	3.03184	3.82587	3.6597	2.70149	7.82985	2.93134	4.32338	2.95821	5.05373
ILMN_1775944	ABI2	1.21592	1.09751	1.16418	1.14527	1.10249	1.10448	1.46766	1.03781	1.17612	0.995025	0.899502	1.23085	0.987065	1.06169	1.05473	1.35423
ILMN_1724497	ABI2	1.46567	1.48657	1.10746	1.27065	1.35423	1.57015	1.95821	1.65373	1.62488	1.29154	1.23881	2.03184	1.14826	1.28657	1.23483	2.03881
ILMN_1720988	ABI2	1.32637	1.11244	1.01791	1.1204	1.00498	1.19602	1.31443	1.08159	1.19104	0.99403	0.972139	1.08458	1.01791	1.05075	1.05871	1.41095
ILMN_1755658	ABI3	3.68756	3.49353	1.83483	4.27761	2.75821	3.38905	5.2	2.85274	3.5204	2.89055	2.95323	3.85771	2.68358	3.00597	2.55622	5.72637
ILMN_1673639	ABI3BP	1.0199	0.940299	0.906468	0.98607	0.958209	0.944279	2.15721	0.871642	1.16816	0.873632	0.865672	1.08458	0.839801	0.960199	0.763184	1.63682
ILMN_1713732	ABL1	3.63881	2.75622	1.64776	3.48557	2.73532	3.38607	2.90846	2.89453	3.61095	2.45473	2.21891	4.07463	2.74925	3.01194	2.59602	2.70746
ILMN_1708922	ABL1	1.07662	1.001	0.999005	1.00199	1.07363	1.09652	1.24378	1.03881	1.03184	1.06766	0.974129	1.14925	1.02985	1.00896	1.10746	1.1602
ILMN_2268241	ABL1	1.08955	0.951244	0.910448	0.859701	0.991045	1.01791	1.19403	0.938308	0.971144	0.876617	0.900498	0.99602	1.05672	0.933333	0.881592	1.07861
ILMN_1741628	ABL2	1.06468	0.968159	1.001	1.00498	1.00299	0.98806	1.24378	1.00597	1.1194	0.965174	0.887562	0.961194	0.860697	1.05572	0.932338	1.46468
ILMN_1657870	ABL2	1.0209	0.941294	0.883582	0.891542	0.956219	0.978109	1.07463	0.918408	0.876617	0.98209	0.889552	0.808955	0.833831	0.894527	0.889552	1.05672
ILMN_2240003	ABL2	1.10846	1.15622	0.975124	1.05274	1.01791	1.10149	1.17711	1.15025	1.03284	0.975124	0.899502	1.18507	0.965174	0.967164	1.01194	1.19104
ILMN_1785424	ABLIM1	17.3433	18.2338	6.23781	13.6806	13.8527	11.2358	15.2378	23.1811	24.4746	7.78905	14.7184	22.9373	12.3274	14.4677	21.1124	15.3582
ILMN_1731610	ABLIM1	1.43383	0.995025	1.08358	1.74328	1.06368	1.71045	1.26667	1.21592	1.28358	1.01393	0.960199	1.4	1.2209	1.04677	1.22886	1.24677
ILMN_1696682	ABLIM1	0.987065	0.941294	0.905473	1.08458	1.0199	0.908458	1.52637	0.932338	0.849751	0.881592	0.868657	0.945274	0.857711	0.962189	0.896517	1.44179
ILMN_2396672	ABLIM1	3.17711	1.63085	1.74129	3.401	1.92637	3.42786	2.11244	3.09254	3.01194	1.84577	2.09353	5.86468	2.72836	1.99303	2.9592	1.99701
ILMN_1758825	ABLIM2	1.10647	1.13333	0.924378	1.02786	1.06567	0.975124	1.46567	1.0199	0.967164	1.09552	0.930348	1.08458	0.838806	0.977114	1.04876	1.36617
ILMN_1656940	ABLIM3	2.4398	2.1393	1.38706	1.52438	2.17015	1.63085	2.34229	3.09851	3.40398	1.78607	1.15622	1.73632	1.34428	2.20896	2.27164	2.67761
ILMN_1656979	ABO	1.01791	0.882587	0.859701	0.936318	0.940299	0.915423	1.32537	0.842786	0.921393	0.80995	0.735323	0.933333	0.872637	0.878607	0.842786	1.23383
ILMN_1731433	ABP1	1.4995	1.02488	1.27264	1.09055	1.31144	1.15821	1.87065	1.24478	1.27463	1.11642	1.46567	1.20896	1.09055	1.06567	0.903483	1.59104
ILMN_1672878	ABR	13.5682	11.7154	8.74428	13.7085	9.24478	16.6766	11.7721	8.9204	11.3174	11.2398	13.3532	21.1831	10.0507	12.0667	9.53831	12.1343
ILMN_1655114	ABR	1.27065	1.04179	1.17214	1.2796	1.16219	1.38209	1.64179	1.16219	1.23781	1.18706	1.04179	1.2796	1.19104	1.03881	1.27264	1.38806
ILMN_1657045	ABR	0.897512	0.842786	0.869652	1.03582	1.01791	0.848756	1.58905	0.953234	0.939303	0.981095	0.849751	0.81791	0.974129	0.968159	0.918408	1.27264
ILMN_1766991	ABRA	1.01095	0.876617	0.978109	0.925373	0.936318	1.04677	1.29751	1.01692	1.07562	0.905473	0.872637	0.977114	0.933333	1.02189	0.912438	1.18905
ILMN_1658083	ABT1	1.21592	1.0806	0.964179	1.21493	1.12935	1.0199	1.32637	1.05075	1.21891	1.09055	0.905473	1.13831	1.11741	1.0597	1.00796	1.23085
ILMN_1802096	ABTB1	32.4945	24.4985	25.2239	27.2776	22.3114	29.4318	36.6667	29.7264	35.6458	24.6846	35.6617	50.7234	15.1333	23.2468	31.0289	32.2985
ILMN_2367165	ABTB1	35.6299	28.6935	24.3174	14.5562	24.408	26.0358	24.0119	23.6308	26.792	25.6199	31.7294	48.2219	15.1652	31.4567	25.792	23.1313
ILMN_1753370	ABTB2	0.947264	0.907463	0.924378	1.03881	0.888557	0.974129	1.44378	1.12836	0.949254	0.973134	0.825871	1.20199	0.836816	0.929353	0.895522	1.34129
ILMN_1738921	ACAA1	8.56716	6.73234	4.90945	9.62886	6.80597	8.90746	7.6	6.90448	8.75025	6.39701	9.45174	13.3423	6.65771	6.51642	7.09652	7.16418
ILMN_1660199	ACAA2	2.55423	1.54328	1.32338	2.20398	1.58706	2.44577	2.30846	1.96219	2.26567	1.65274	1.85075	3.16318	1.72736	2.06468	1.81592	2.4597
ILMN_2331636	ACACA	2.00995	1.8806	1.3592	2.39801	1.92239	2.25572	2.10249	1.99502	2.37114	1.71443	1.64478	2.43582	1.96716	1.75522	1.77114	2.42687
ILMN_1772123	ACACA	1.5801	1.47363	1.15323	1.69353	1.44279	1.98408	1.71144	1.56816	1.62886	1.37114	1.24577	1.92239	1.51343	1.37214	1.66368	1.82189
ILMN_1667641	ACACA	0.977114	0.960199	0.961194	0.838806	0.922388	0.928358	1.24577	0.857711	1.00597	0.950249	0.827861	0.904478	0.866667	0.978109	0.896517	1.05672
ILMN_1763852	ACACB	2.41294	2.22587	1.22985	2.55821	2.2796	2.12338	2.78706	3.65672	2.87264	1.91741	1.29353	2.45075	2.12438	1.8408	2.1005	2.21592
ILMN_1687303	ACAD10	1.599	1.53035	1.36119	1.78308	1.64975	1.90348	1.84776	1.64279	1.88657	1.54229	1.65672	1.94925	1.38109	1.3005	1.65771	2
ILMN_1761058	ACAD11	1.83582	2.01294	1.32836	3.02289	1.72338	2.52537	2.29055	2.67363	3.04478	1.40796	2.1194	2.71741	1.85771	1.48458	2.399	2.56816
ILMN_2225595	ACAD8	3.2806	2.82786	1.95423	3.56418	2.82189	3.36816	3.26368	3.0806	3.62886	2.38806	3.25572	5.61891	2.59403	2.75423	2.96915	2.94726
ILMN_1775579	ACAD9	3.0796	3.13831	1.9393	3.36418	2.71144	3.08657	3.39701	2.91642	3.66667	2.68159	2.71343	3.58209	2.63781	2.54925	2.71542	3.45672
ILMN_1660890	ACADL	0.872637	0.877612	0.925373	0.938308	0.783085	0.841791	1.31741	0.935323	0.847761	0.833831	0.753234	0.852736	0.736318	0.873632	0.881592	1.01592
ILMN_2053679	ACADM	4.57313	3.40796	2.38905	5.33035	3.45771	4.56517	5.87861	4.09552	4.49154	3.39204	2.6806	6.67662	4.11144	4.21592	3.78209	5.1592
ILMN_1795104	ACADS	2.05274	2.48358	1.82587	1.76119	1.94129	1.56517	2.33134	1.97612	1.89055	1.72537	2.25572	2.12537	1.57711	2.13731	1.55323	2.43781
ILMN_1740920	ACADSB	1.13234	1.07264	0.99005	1.07562	1.06169	1.09552	1.35124	1.08955	1.00398	1.06866	1.02985	1.14726	1.06667	1.04975	1.01294	1.13035
ILMN_2263466	ACADVL	1.20796	0.968159	1.0607	1.16617	1.09652	1.35522	1.10746	0.965174	1.04478	1.02786	0.908458	0.98209	0.995025	0.862687	1.2209	1.02687
ILMN_1806408	ACADVL	19.591	19.8249	11.3632	23.4647	17.0647	22.205	22.1582	18.603	24.0109	16.4109	30.2139	37.2318	14.3572	18.9453	17.6209	22.0169
ILMN_2352009	ACADVL	6.99204	8.77413	4.37711	7.05771	7.1005	6.65672	6.95522	5.93632	8.93134	6.28458	10.6229	11.9751	5.28557	6.92139	6.80498	7
ILMN_1693148	ACAN	0.985075	0.799005	0.81194	0.849751	0.814925	0.81791	1.11343	0.808955	0.848756	0.79005	0.822886	0.848756	0.878607	0.825871	0.7801	1.06468
ILMN_1808395	ACAP1	13.7075	18.4677	6.49652	12.2806	12.5692	10.5323	11.392	16.9313	19.1373	9.01692	17.7154	20.792	8.91841	9.84577	15.6557	13.9114
ILMN_1743847	ACAP3	0.993035	1.0995	0.937313	0.99403	1.07264	1.01393	1.40995	1.02189	1.01891	0.853731	0.851741	1.21294	0.867662	0.938308	1.09254	1.30945
ILMN_1800008	ACAT1	4.53134	3.92935	2.29552	4.4408	3.54229	4.34726	4.001	4.21095	6.52637	3.37512	3.39701	5.67065	4.22786	4.12537	3.89751	3.83383
ILMN_2133799	ACAT2	0.898507	0.936318	0.876617	1.02189	0.885572	0.919403	1.14826	0.921393	0.985075	0.912438	0.8199	0.906468	0.876617	0.956219	0.810945	0.974129
ILMN_1665945	ACBD3	4.29453	3.2199	1.94726	3.14826	2.90746	3.24677	5.46368	4.07861	4.15522	2.79502	2.89353	5.86169	3.49751	4.44975	3.2796	5.00597
ILMN_1676288	ACBD4	1.201	0.974129	1.03184	1.03781	1.06965	1.19204	2.66667	1.06866	1.13632	0.99204	0.971144	0.929353	0.99005	0.941294	0.958209	2.01294
ILMN_1693250	ACBD5	1.09154	1.03284	1.02189	1.06965	1.06766	1.08756	2.08955	0.824876	1.03085	0.969154	0.867662	1.1204	0.895522	0.965174	1.01692	1.60597
ILMN_2295980	ACBD5	1.00995	0.961194	0.911443	0.939303	0.9801	0.918408	1.18308	0.830846	0.923383	0.882587	0.889552	0.827861	0.844776	0.856716	0.841791	1.11244
ILMN_2410362	ACBD5	1.12836	1.09254	1.04279	0.938308	1.0796	1.06468	1.0607	1.13333	0.957214	1.06866	0.893532	1.0209	1.0209	1.06766	0.987065	1.08458
ILMN_1684271	ACBD6	1.73731	1.47065	1.23781	1.401	1.75821	1.41393	2.01095	1.88259	1.87562	1.21791	1.10945	1.99602	1.35224	1.73333	1.49353	1.80995
ILMN_1726388	ACBD7	0.977114	0.770149	0.778109	0.847761	0.856716	0.79204	1.08856	0.793035	0.774129	0.799005	0.822886	0.867662	0.736318	0.945274	0.916418	1.06269
ILMN_2106002	ACBD7	1.0408	0.960199	0.861692	0.838806	0.941294	0.932338	1.35423	1.00398	0.947264	0.828856	0.908458	0.946269	0.904478	0.854726	0.877612	1.20697
ILMN_1779685	ACCN1	0.879602	0.925373	0.942289	0.968159	0.947264	1.00697	1.13731	0.999005	0.830846	0.848756	0.909453	1.02189	0.877612	0.908458	0.924378	1.11741
ILMN_1769694	ACCN2	1.05672	1.08159	1.03483	1.10149	1.1204	1.09552	1.41592	0.995025	1.12139	0.975124	0.944279	1.27463	1.02886	0.983085	0.974129	1.32338
ILMN_1727251	ACCN2	0.970149	0.828856	1.00299	1.05572	0.956219	0.99204	1.24577	0.867662	0.955224	0.834826	0.931343	0.862687	0.924378	0.911443	0.964179	1.14229
ILMN_1734479	ACCN3	1.3602	1.25572	1.03284	1.35025	1.23383	1.13831	1.76219	1.32537	1.5204	1.199	0.947264	1.28159	1.0995	1.27264	1.15522	1.83383
ILMN_2368728	ACCN3	1.04677	1.0796	0.897512	0.936318	1.08955	0.949254	1.32637	1.05274	1.19104	0.879602	0.802985	0.923383	0.961194	1.01692	0.907463	1.15622
ILMN_2394902	ACCN4	1.07463	1.08358	0.946269	1.02488	0.961194	0.929353	2.14925	1.07363	0.981095	0.964179	0.936318	0.900498	1.01891	1.06667	1.06766	1.92139
ILMN_2394897	ACCN4	0.959204	0.894527	0.840796	0.951244	0.872637	0.99005	1.13433	0.903483	1.00398	0.889552	0.758209	0.997015	0.823881	0.99602	0.849751	1.05473
ILMN_2287535	ACCN4	0.985075	0.960199	0.987065	0.969154	0.911443	0.889552	1.33632	0.957214	0.879602	0.895522	0.844776	1.01493	0.919403	0.976119	0.953234	1.15124
ILMN_1750295	ACCN5	0.903483	0.969154	1.01294	0.952239	0.949254	0.942289	1.48259	0.881592	0.893532	0.914428	0.887562	0.929353	0.856716	0.856716	0.945274	1.34726
ILMN_1716480	ACD	3.71741	3.24776	2.06766	2.89851	2.08955	3.39701	4.66567	2.98706	3.37711	2.3791	2.87861	3.89353	2.53831	2.67662	2.58905	3.9194
ILMN_1715192	ACE	0.888557	0.98408	0.99005	0.973134	0.983085	0.968159	1.19204	0.960199	0.960199	0.907463	0.910448	0.971144	0.933333	0.916418	0.923383	1.26965
ILMN_2339410	ACE	0.924378	0.822886	0.812935	0.837811	0.860697	0.824876	1.27065	0.834826	0.892537	0.849751	0.821891	0.978109	0.743284	0.913433	0.851741	1.27065
ILMN_1779984	ACE	0.950249	0.916418	0.881592	0.889552	0.903483	0.928358	1.12438	0.918408	0.901493	0.8	0.903483	0.878607	0.810945	0.793035	0.776119	1.13134
ILMN_1667018	ACE2	0.908458	0.882587	0.823881	0.942289	0.991045	0.966169	1.59403	0.868657	0.928358	0.922388	0.81791	0.953234	0.894527	1.00498	0.816915	1.21493
ILMN_2333219	ACHE	0.927363	0.970149	0.844776	0.920398	0.881592	0.868657	1.23881	0.855721	0.880597	0.874627	0.871642	0.936318	0.736318	0.939303	0.755224	1.18109
ILMN_1780485	ACHE	1.0408	1.1403	1.19502	1.02587	1.17214	0.939303	1.25572	1.06965	1.00796	1.04179	0.915423	1.02687	1.02488	1.07164	1.05174	1.18308
ILMN_1699636	ACIN1	8.78905	9.38607	3.82886	6.73333	7.6	5.30647	8.4199	8.71343	8.90448	5.55821	7.10647	9.24577	5.09055	7.92637	6.74229	9.93532
ILMN_2371379	ACLY	9.90846	7.80796	4.61194	9.89353	7.42886	10.0816	12.4517	9.06269	10.6119	6.60498	8.04478	12.8577	7.93134	9.83184	8.26667	12.0965
ILMN_1727091	ACMSD	1.35224	1.23483	1.20498	1.38109	1.32537	1.28557	2.31443	1.5403	1.42189	1.26567	1.14527	1.6607	1.23284	1.4806	1.32139	2.05274
ILMN_2134039	ACN9	2.87065	2.0995	1.8199	2.92537	2.3592	2.47463	4.71841	2.3801	3.23284	2.399	2.56915	4.00299	2.54328	2.99303	2.10647	5.03781
ILMN_1750800	ACO1	4.05174	3.32239	2.06468	3.57811	2.80995	4.17612	3.63682	2.86269	3.39701	2.96915	2.45771	5.01592	2.81592	3.72637	3.20995	3.43284
ILMN_1654861	ACO2	2.97114	3.00995	2.00597	3.06766	2.75522	2.74428	2.11343	2.44776	2.48159	2.52239	2.67662	4.11841	2.18308	2.80995	2.34129	2.17413
ILMN_2121389	ACOT1	1.12836	0.939303	1.01393	0.99005	0.938308	0.929353	1.73234	1.03383	1.01692	0.909453	0.848756	1.00896	0.833831	0.98408	0.886567	1.50249
ILMN_1715543	ACOT1	1.3602	0.956219	0.993035	1.18507	1.04577	1.36219	1.66468	1.03582	1.21095	0.885572	0.841791	1.12537	1.16219	0.99403	0.98408	1.41791
ILMN_1739594	ACOT11	1.10547	1.04876	1.02587	1.17015	1.16617	1.15423	1.39801	1.36816	1.09254	1.19502	0.862687	1.12239	1.01891	1.02886	1.06667	1.43682
ILMN_2353978	ACOT11	1.24776	1.08756	1.10647	1.01194	1.00498	1.04975	1.21891	1.04279	1.09254	1.1592	0.967164	1.09055	1.03781	1.06866	1.03284	1.21294
ILMN_1785474	ACOT12	1.05672	0.98607	0.943284	1.00796	1.03483	0.99602	1.599	1.06368	1.03483	0.981095	0.940299	1.01891	0.99403	0.920398	1.05871	1.17512
ILMN_2188959	ACOT2	0.931343	0.888557	0.848756	0.865672	0.911443	0.892537	1.17612	0.877612	0.928358	0.856716	0.874627	0.947264	0.808955	0.838806	0.892537	1.1393
ILMN_1764321	ACOT4	1.2796	1.30846	0.869652	1.12239	1.32637	1.31443	1.71045	1.18209	1.53532	1.07463	1.12935	1.51045	1.34129	1.09055	1.35622	1.5592
ILMN_2156699	ACOT6	0.860697	0.891542	0.929353	0.864677	1.02189	0.730348	1.18706	0.856716	0.879602	0.80995	0.778109	0.826866	0.753234	0.882587	0.783085	1.07164
ILMN_1788078	ACOT7	0.943284	0.902488	0.927363	0.914428	1.001	0.820896	1.69453	0.970149	1.00597	0.850746	0.79403	1.00896	0.810945	0.900498	0.872637	1.20498
ILMN_1784756	ACOT7	0.9801	0.864677	0.884577	0.976119	0.838806	0.907463	1.21891	1.04179	0.907463	0.80995	0.715423	0.826866	0.940299	0.855721	0.886567	1.10448
ILMN_1740265	ACOT7	3.60796	4.01791	2.53333	2.87861	3.32239	2.8806	3.71144	3.58308	4.62189	2.96915	2.22786	3.70348	2.41493	2.81493	2.7005	3.95323
ILMN_2252621	ACOT7	0.885572	0.910448	0.802985	0.921393	1.02985	0.846766	1.90945	0.910448	0.850746	0.931343	0.932338	0.961194	0.898507	0.867662	0.879602	1.65075
ILMN_2332250	ACOT7	1.6398	1.85572	1.6408	1.44179	1.59502	1.45871	2.1005	1.57512	2.2	1.52338	1.5801	1.91045	1.43085	1.54826	1.61891	1.78507
ILMN_1719178	ACOT7	1.00199	0.911443	0.845771	0.974129	0.950249	0.99204	1.7194	0.844776	0.850746	0.858706	0.765174	0.834826	0.793035	0.892537	0.842786	1.53831
ILMN_1679600	ACOT8	1.84776	1.70746	1.30945	1.55622	1.39104	1.71443	1.53532	1.30348	1.75522	1.54328	1.25771	1.7194	1.38607	1.60995	1.36517	1.63881
ILMN_2367070	ACOT9	1.62786	1.18507	1.23085	1.91542	1.29751	1.53831	1.93632	1.26667	1.7801	1.24975	1.3005	2.1393	1.2398	1.20995	1.38209	1.999
ILMN_1658995	ACOT9	3.06468	1.6995	1.87463	4.4806	1.97413	3.88159	3.17512	1.93035	2.48657	2.72736	2.2408	4.97313	2.94627	2.41294	2.52338	2.62189
ILMN_1750158	ACOX1	3.39801	2.90846	2.98607	3.26965	2.44279	3.65473	3.9801	1.68756	2.84179	3.23881	3.95622	9.67264	3.06766	4.49751	2.60299	3.80697
ILMN_1668839	ACOX1	1.05771	1.00796	1.01891	1.04776	1.02886	1.1801	1.23582	0.98408	1.04577	1.12139	0.952239	1.13731	0.997015	0.978109	0.916418	1.04876
ILMN_1765767	ACOX1	1.02587	0.897512	1.08557	1.09851	0.925373	1.13433	1.001	0.853731	0.922388	0.953234	0.879602	1.18706	0.981095	0.892537	0.79204	1.10746
ILMN_1685703	ACOX2	0.960199	0.860697	0.865672	0.989055	0.889552	0.978109	1.23284	1.03682	0.893532	0.909453	0.893532	0.940299	0.759204	0.848756	0.875622	1.10945
ILMN_1743396	ACOX3	2.28756	1.85771	1.3393	1.99104	1.71443	2.199	2.30746	1.91144	2.31741	1.60995	1.92139	2.35522	1.6995	1.62388	1.72836	2.82488
ILMN_1743680	ACOXL	0.98408	0.926368	0.905473	0.875622	0.846766	0.895522	1.2607	0.80199	0.907463	0.876617	0.810945	0.963184	0.764179	0.887562	0.876617	1.03483
ILMN_1669633	ACP1	4.57313	2.47562	2.82786	5.05274	3.1393	5.36517	3.29652	3.74428	4.29851	4.48955	2.84776	8.13532	4.20697	3.36816	3.53134	3.11841
ILMN_2344956	ACP1	7.60299	4.48358	10.604	12.2597	4.77413	13.9284	5.73035	5.3791	7.17214	18.3075	3.59204	10.5284	7.91642	7.21692	5.90149	5.93731
ILMN_2104830	ACP2	2.07463	1.49353	1.12935	2.01493	1.53234	1.80299	2.24378	1.62886	2.38706	1.52736	1.71642	1.56716	1.68955	1.76716	1.68756	2.14726
ILMN_2078599	ACP5	3.04677	2.0398	1.54129	2.23483	2.70647	2.45771	2.49154	2.00896	2.05075	1.73333	1.73433	2.78706	2.67662	2.58507	2.01891	2.41791
ILMN_2234343	ACP6	1.49453	1.31841	1.199	1.23483	1.2398	1.5403	1.51741	1.3801	1.4209	1.199	1.17711	1.32239	1.30547	1.49055	1.25075	1.45373
ILMN_2306955	ACPL2	1.92935	1.04776	1.31841	1.67562	1.53234	1.85672	1.87264	1.37313	1.48657	1.27065	1.37811	2.62886	1.47164	1.54925	1.38607	1.65174
ILMN_1758323	ACPP	2.10448	1.25274	1.75025	1.73035	1.64876	1.94428	2.33035	1.7204	1.76617	1.62687	1.18806	2.34627	1.56816	2.08856	1.33035	2.13433
ILMN_1728331	ACPT	4.54328	4.66169	4.42488	2.76816	5.20995	4.68458	7.31542	3.48955	2.76617	3.67861	2.4796	2.59005	3	4.19502	2.66866	7.6199
ILMN_2351906	ACPT	0.99801	0.958209	0.918408	0.806965	0.868657	0.924378	1.46368	0.831841	0.910448	0.845771	0.852736	0.995025	0.81393	0.880597	0.975124	1.01294
ILMN_1705637	ACR	1.14925	1.2796	1.23881	1.05672	1.15622	1.14726	1.57214	1.20597	1.1194	1.11144	0.997015	1.14129	0.973134	1.13831	0.940299	1.54726
ILMN_1784203	ACRBP	9.69055	11.208	8.06368	8.67164	12.9692	9.36816	10.1861	17.8129	12.195	10.9721	7.63483	12.806	8.18607	11.0876	13.2368	10.9622
ILMN_1666690	ACRC	1.56816	1.37512	1.17512	1.52338	1.52637	1.40299	2.03682	1.4398	1.71443	1.401	1.22388	1.73234	1.35522	1.53333	1.65075	1.84179
ILMN_1654468	ACRV1	1.2607	1.09552	1.16219	1.24378	1.2	1.1194	1.48159	1.1801	1.14129	1.08259	1.02886	1.29652	1.00398	1.10547	1.08259	1.36219
ILMN_2320277	ACRV1	1.10945	0.918408	0.947264	0.967164	1.01194	0.912438	1.29851	0.976119	0.953234	0.898507	0.935323	1.0398	0.895522	0.956219	0.880597	1.19403
ILMN_2227011	ACSBG1	1.88159	1.95423	2.09055	1.42488	1.601	1.24876	1.74826	1.86766	1.96418	2.49751	1.24577	2.15124	1.27363	1.74129	1.59005	1.9393
ILMN_1730002	ACSBG2	1.05871	1.03085	0.960199	0.921393	1.04975	0.981095	1.54726	1.02587	1.09652	0.924378	0.880597	1.07662	0.941294	0.941294	0.919403	1.11741
ILMN_1716832	ACSF3	1.22886	1.76617	1.36318	0.983085	1.0597	0.970149	1.5602	1.01791	0.99204	1.54328	1.75622	0.997015	0.909453	1.62587	1.01095	1.53433
ILMN_1684585	ACSL1	16.9104	10.5144	12.5801	10.8368	8.86965	19.5542	13.2915	8.79104	7.40896	16.0786	21.6368	39.6905	8.22388	17.208	11.7413	16.5224
ILMN_2360705	ACSL3	3.6806	2.39701	2.03582	4.19204	2.74328	4.25373	3.69154	3.28358	2.8995	3.00896	2.5403	7.12935	3.1005	3.16318	3.04776	3.0806
ILMN_1654414	ACSL3	1.25572	0.967164	0.98806	1.2209	1.03682	1.42587	1.37015	0.960199	1.08955	1.14428	0.937313	1.3403	1.0607	1.08358	1.08856	1.32239
ILMN_1666096	ACSL3	1.95224	2.46766	1.8607	3.97114	1.40796	1.66667	2.88358	3.02587	4.57612	3.29851	2.07562	7.94826	2.94925	3.08358	3.37612	3.39403
ILMN_2391458	ACSL4	1.23881	1.05373	1.00697	0.973134	1.09154	1.09254	1.92239	0.937313	0.878607	1.06468	0.946269	1.0607	0.941294	1.03383	0.960199	1.58706
ILMN_2285506	ACSL4	1.56517	1.1791	1.19801	1.61791	1.37015	1.73632	2.47861	1.36318	1.68657	1.30448	1.25274	1.86468	1.35622	1.28955	1.35124	2.24179
ILMN_1691714	ACSL4	0.916418	0.911443	0.891542	0.925373	0.942289	0.864677	1.11244	0.774129	0.850746	0.818905	0.829851	0.901493	0.870647	0.872637	0.862687	0.943284
ILMN_1683598	ACSL4	5.35721	3.62189	4.1801	6.13632	3.42886	6.25274	6.3204	3.70945	3.79303	5.31542	6.20597	15.4876	4.37512	5.59104	4.14129	6.94328
ILMN_2370882	ACSL5	2.2209	1.43284	1.29751	2.23781	1.6408	1.999	1.79303	1.48458	1.59204	1.36418	1.69055	3.18408	1.799	1.58308	1.68259	1.6398
ILMN_2273911	ACSL5	1.02587	1.19303	1.01294	0.966169	1.05672	0.843781	1.23383	1.09254	0.914428	0.840796	0.8199	1.06766	0.964179	0.943284	0.785075	1.17114
ILMN_1807914	ACSL5	0.952239	0.868657	0.838806	0.891542	0.903483	0.893532	1.07662	0.869652	0.886567	0.850746	0.891542	0.916418	0.857711	0.835821	0.923383	1.11443
ILMN_1678517	ACSL5	0.972139	0.899502	1.0199	0.945274	0.850746	1.06766	1.34925	0.8	0.905473	0.943284	0.870647	0.939303	0.844776	0.917413	0.848756	1.10149
ILMN_1705247	ACSL5	10.6547	8.2398	3.51542	10.2418	7.50149	10.202	9.55025	8.11542	9.9602	5.70348	7.00299	13.9463	7.51841	8.0806	7.3403	9.08657
ILMN_2278242	ACSL6	1.06866	0.829851	0.859701	0.911443	1.11343	0.886567	1.52438	0.844776	1.00398	0.973134	0.831841	0.891542	0.863682	0.869652	0.863682	1.11741
ILMN_1730025	ACSL6	0.876617	0.79602	0.846766	1.08856	0.924378	0.901493	1.27662	0.848756	0.932338	0.899502	0.776119	1.05771	0.876617	0.897512	0.929353	1.00498
ILMN_2378555	ACSL6	1.1005	1.11045	1.00199	1.10746	0.970149	1.11045	1.37214	1.1194	1.10647	1.02289	0.922388	1.14527	0.893532	1.01095	1.03184	1.17214
ILMN_1661434	ACSM1	0.957214	0.930348	0.868657	0.929353	0.905473	0.859701	1.01194	0.889552	0.843781	0.850746	0.866667	1.01493	0.901493	0.833831	0.912438	0.959204
ILMN_1765912	ACSM2B	0.952239	0.959204	0.850746	0.877612	0.853731	0.945274	1.20995	0.926368	0.981095	0.900498	0.842786	0.99204	0.855721	0.795025	0.900498	1.09154
ILMN_1746128	ACSM2B	0.877612	0.888557	0.816915	0.889552	0.877612	0.876617	1.27463	0.872637	0.919403	0.772139	0.884577	0.867662	0.816915	0.936318	0.974129	1.07264
ILMN_1685952	ACSM3	1.11642	0.854726	1.02388	1.02985	0.941294	1.03881	1.57413	1.14627	0.941294	0.884577	0.843781	1.01592	0.856716	0.923383	0.850746	1.24279
ILMN_1662738	ACSM3	1.06866	0.890547	0.905473	0.99005	0.920398	1.00199	1.08557	1.07463	1.10846	0.974129	0.950249	0.939303	0.732338	0.883582	1	1.1801
ILMN_1771084	ACSM3	1.3801	1.27562	1.04478	1.50448	1.40199	1.23483	1.60299	1.48955	1.41791	1.31841	1.05871	2.0199	1.1194	1.21194	1.17114	1.56915
ILMN_2070792	ACSM5	1.14826	1.1592	1.1393	1.29751	1.22687	1.14925	1.57015	1.24179	1.19104	1.23483	0.98408	1.1801	1.08259	1.36418	1.02985	1.84478
ILMN_1752269	ACSS1	5.40299	6.00796	2.21393	4.14826	4.29453	2.69453	4.46766	5.98408	7.39801	3.1801	4.6408	6.601	4.12438	4.17114	4.04279	4.79602
ILMN_1697510	ACSS2	1.14826	0.838806	0.818905	0.960199	1.13831	1.03582	2.21393	0.929353	0.810945	0.825871	0.776119	0.926368	0.864677	0.806965	0.857711	1.94229
ILMN_2254962	ACSS2	1.05075	1.0398	0.952239	1.03184	1.06169	0.889552	1.36716	0.893532	0.868657	0.896517	0.912438	1.01891	0.848756	0.882587	0.947264	1.39403
ILMN_2336595	ACSS2	10.5443	8.76119	5.95124	9.61791	6.85373	11.0388	10.2866	8.13632	10.4597	7.0209	9.26667	15.9443	6.84677	8.79204	9.45672	9.9403
ILMN_1714197	ACSS2	14.1254	11.0826	6.66667	13.6209	9.41791	15.39	13.2866	11.7572	14.1582	10.191	11.805	20.3821	10.0706	12.7254	11.1383	13.0498
ILMN_1659885	ACSS3	0.991045	0.867662	0.935323	0.916418	1.08955	0.99403	1.31244	1.00398	1.00597	0.977114	0.770149	0.868657	0.824876	1.05075	0.820896	1.41294
ILMN_2125869	ACTA1	0.983085	0.955224	0.878607	1.04975	0.954229	0.895522	0.995025	0.954229	0.917413	0.961194	0.833831	0.932338	0.793035	0.871642	0.9801	1.06269
ILMN_1671703	ACTA2	7.58706	6.70846	3.54527	3.25771	3.80995	10.0836	6.399	5.81891	3.25075	4.87861	3.24677	5.54726	7.40199	5.1791	5.69254	5.99303
ILMN_2152131	ACTB	575.283	500.305	307.485	373.145	430.524	470.555	465.685	540.753	501.226	417.226	317.047	534.967	348.775	496.563	388.535	495.216
ILMN_2038777	ACTB	391.338	347.659	213.313	244.988	340.753	338.834	365.722	327.454	398.746	318.431	230.055	393.364	253.942	349.347	252.093	349.915
ILMN_1658660	ACTC1	0.913433	0.99204	0.905473	0.836816	0.924378	0.858706	1.28856	0.818905	0.902488	0.758209	0.743284	0.902488	0.812935	0.804975	0.800995	1.33134
ILMN_2053178	ACTG1	425.933	342.349	228.027	311.151	305.317	401.075	328.984	335.647	386.364	319.89	386.656	595.667	329.484	375.27	343.292	312.681
ILMN_1795325	ACTG2	0.958209	0.925373	0.930348	1.00995	1.01891	0.939303	1.28159	0.863682	0.898507	0.872637	0.939303	0.933333	0.78209	0.959204	0.856716	1.08159
ILMN_1749297	ACTL6A	4.83284	2.73035	2.28856	5.58706	3.0408	5.05274	4.88259	3.99403	4.02587	3.51045	3.38706	8.33333	4.32935	3.67164	3.78607	4.26468
ILMN_2328280	ACTL6A	2.46468	1.66169	1.58408	2.72338	1.77811	2.73532	2.26965	1.98308	2.10846	2.0199	1.49751	3.37711	2.401	1.89254	1.89254	1.98706
ILMN_1657855	ACTL6B	1.24975	0.98408	0.955224	0.962189	0.989055	1.01891	1.29154	0.968159	0.957214	0.995025	0.981095	1.04677	0.889552	1.00896	0.970149	1.201
ILMN_1717900	ACTL7A	0.950249	0.879602	0.910448	0.865672	0.961194	0.975124	1.16915	0.962189	1.03682	0.876617	0.756219	0.906468	0.823881	0.857711	0.859701	1.11144
ILMN_1796088	ACTL7B	1.06667	0.907463	0.952239	1.02587	0.833831	0.909453	1.18507	0.867662	1.00398	0.924378	0.941294	0.999005	0.823881	0.970149	0.993035	1.18905
ILMN_1704078	ACTL8	1.02388	0.913433	0.99602	1.01791	1.08259	1.07065	2.14925	0.940299	1.07264	0.928358	0.830846	0.958209	0.950249	1.04378	0.969154	1.86269
ILMN_2232177	ACTN1	81.5891	69.9303	60.8438	49.5383	58.6637	63.4438	61.6816	57.9562	75.2945	80.4269	66.3333	103.891	52.5851	76.8826	58.399	66.3224
ILMN_1654422	ACTN2	1.09453	1.00498	1.05174	1.19403	1.01891	1.11542	1.65174	1.30945	1.19403	0.972139	0.954229	1.27264	0.968159	1.09353	1.12438	1.62786
ILMN_1665691	ACTN3	1.00299	0.937313	0.890547	0.877612	0.942289	0.870647	1.16617	0.901493	0.872637	0.938308	0.846766	0.894527	0.880597	0.999005	0.877612	1.42886
ILMN_1725534	ACTN4	10.406	8.08358	5.62886	5.81692	7.71841	6.02886	10.9254	6.66567	9.87761	7.19303	7.65075	10.6259	6.14428	9.11045	6.67662	11.2308
ILMN_1798254	ACTR10	4.50547	3.33134	3.19303	4.49055	3.21791	4.71741	6.32935	3.5791	4.55522	3.18806	3.75721	7.93035	3.5791	3.90746	3.67562	5.81194
ILMN_1792314	ACTR1A	7.11343	6.93731	6.47264	8.29154	5.90348	10.4119	9.18905	6.08955	7.05771	6.53532	7.87264	16.0199	5.76816	6.2	6.23881	9.72537
ILMN_1695821	ACTR1B	3.69154	2.78408	2.02786	3.34925	3.44776	3.31045	4.00398	3.32139	4.46169	2.1791	2.85672	3.86169	3.17811	3.47562	3.26169	3.70945
ILMN_2388605	ACTR2	48.4697	36.1343	33.791	52.2677	30.7662	48.0756	48.598	37.801	37.7741	44.0607	39.6517	88.1433	39.2498	59.9134	38.8169	42.4617
ILMN_1657153	ACTR3	10.7174	7.3194	5.46468	10.7751	6.41692	10.8985	8.3403	9.18408	10.4716	7.79602	8.11741	22.1552	7.91443	9.57711	9.4209	8.84279
ILMN_2260392	ACTR3B	1.17413	1.03781	0.99403	1.0796	1.11642	1.24876	1.50547	1.03682	1.19701	0.929353	1.0597	1.36816	1.24876	1.09751	1.17512	1.2
ILMN_2346451	ACTR3B	1.09254	1.08358	0.840796	1.04478	0.953234	1.00498	1.0995	0.954229	1.07363	0.969154	0.864677	1.0796	0.884577	0.957214	0.969154	1.05274
ILMN_1787513	ACTR3B	0.953234	1.07463	1.07264	1.13134	1.0209	1.31244	2.3403	0.898507	0.842786	0.940299	0.912438	1.19104	0.871642	0.886567	0.963184	1.86368
ILMN_1652594	ACTR5	2.19502	2.14925	1.5194	2.75323	2.04776	2.42189	2.62985	2.33831	2.38706	1.70547	1.73333	2.60199	1.87562	1.72338	2.0209	2.76119
ILMN_1697585	ACTR6	2.9592	2.3801	1.44279	3.13731	2.3204	2.63582	3.92836	2.78507	3.12836	1.81592	2.22189	4.16816	2.43582	2.45373	2.09652	3.88557
ILMN_1689162	ACTR8	1.38905	1.24577	1.06667	1.25672	1.27363	1.42985	1.69154	1.08657	1.3602	1.1005	0.995025	1.59104	1.17413	1.22189	1.25871	1.61294
ILMN_1815392	ACTRT1	4.58806	4.43483	4.06667	1.69552	4.94627	3.78308	6.49851	1.8806	1.72338	3.13433	1.92736	1.54627	2.65373	3.26368	1.76716	6.67761
ILMN_1760490	ACVR1	3.74229	2.62985	2.11144	3.72935	2.50547	4.34229	4.36119	3.79502	3.801	3.14627	2.35423	5.07662	2.67363	3.19403	2.6796	4.02786
ILMN_1786544	ACVR1B	1.23383	1.13035	1.21692	1.13234	1.23184	1.21592	1.66368	1.0995	1.15025	1.17114	1.06368	1.12338	1.1801	1.25871	0.960199	1.54826
ILMN_1763916	ACVR1B	1.06567	0.917413	1.05871	0.916418	1.10746	1.05274	1.64478	0.908458	0.926368	0.957214	0.922388	1.1602	0.905473	0.906468	1.0408	1.33234
ILMN_2243308	ACVR1B	3.84975	2.97214	2.999	4.97015	3.87861	5.22985	4.01194	3.69552	3.72139	3.81592	3.4806	7.46169	3.99303	3.53234	3.28159	3.9592
ILMN_1766723	ACVR1B	0.99204	0.843781	0.868657	0.899502	0.961194	1.01692	1.3592	0.99602	0.852736	0.973134	0.800995	0.852736	0.852736	0.80796	0.846766	1.31443
ILMN_1689217	ACVR1C	0.821891	0.868657	0.915423	0.940299	0.928358	0.978109	1.43682	0.909453	0.961194	0.80995	0.835821	0.876617	0.793035	0.918408	0.99005	1.02886
ILMN_2152711	ACVR2A	1.80398	1.72338	1.56119	1.84378	1.69652	1.94627	2.26567	2.07363	1.89851	1.53632	1.47861	1.80995	1.50149	1.74826	1.87562	2.04876
ILMN_1668983	ACVR2B	1.03184	1.1393	0.904478	0.866667	0.964179	0.913433	1.37612	0.913433	0.945274	0.791045	0.822886	0.908458	0.828856	0.866667	0.846766	1.39005
ILMN_1807493	ACVRL1	0.948259	0.856716	0.908458	0.939303	0.915423	1.001	1.01294	0.898507	0.928358	0.840796	0.863682	0.932338	0.731343	0.905473	0.882587	0.951244
ILMN_1683883	ACY1	1.94129	1.64279	1.64378	1.78706	1.63284	1.73532	2.20896	1.78905	1.999	1.29254	1.66269	2.26766	1.56915	1.62289	1.45871	1.86468
ILMN_1670193	ACY3	0.846766	0.848756	0.806965	0.847761	0.933333	0.844776	1.40896	0.907463	0.898507	0.876617	0.765174	1	0.814925	0.836816	0.856716	1.47861
ILMN_2319825	ACYP1	1.24876	1.06866	0.989055	1.31841	1.18706	1.08657	2.22388	1.02388	1.20597	1.09154	0.898507	1.12139	0.943284	1.11343	1.0199	1.93035
ILMN_1694233	ACYP1	2.60896	2.08657	1.62488	3.24975	1.85473	3.12239	3.21791	3.37015	3.3005	1.88259	2.15323	3.72736	2.2408	2.10647	2.66269	2.87463
ILMN_1686432	ACYP1	0.978109	0.930348	0.967164	1.04577	1.00299	0.899502	1.21294	0.964179	0.971144	0.895522	0.789055	1.11642	0.906468	0.903483	0.985075	1.1393
ILMN_2158705	ACYP2	1.87363	1.23483	1.15124	2.24378	1.46965	1.63085	1.8796	1.35522	1.97811	1.60896	1.31144	2.19204	1.59303	1.51343	1.49652	1.72836
ILMN_1803686	ADA	5.31244	6.14129	2.78408	6.99602	5.91841	5.74428	5.96418	4.8398	7.13035	4.55224	6.19104	9.37612	5.51045	4.76716	4.84179	5.87164
ILMN_1745580	ADAD1	0.775124	0.830846	0.877612	0.885572	0.886567	0.849751	1.24577	0.800995	0.890547	0.821891	0.770149	0.883582	0.818905	0.791045	0.901493	1.14726
ILMN_1745108	ADAD2	0.924378	0.989055	0.933333	0.911443	0.949254	0.839801	1.65572	0.8	0.955224	0.933333	0.797015	0.810945	0.881592	0.845771	0.863682	1.21592
ILMN_1725043	ADAL	1.03682	1.09552	1.09055	1.12736	0.897512	1.14428	1.48557	1.09154	1.13234	0.929353	0.940299	1.38607	0.985075	1.12935	1.13731	1.29652
ILMN_2148360	ADAM10	1.20199	0.970149	0.918408	1.22786	0.9801	1.07065	1.37413	0.877612	1.06567	0.98607	0.878607	1.27463	0.804975	1.00697	0.858706	1.13134
ILMN_1711374	ADAM11	0.923383	0.931343	0.870647	0.890547	0.970149	0.857711	1.4995	0.872637	0.98607	0.859701	0.886567	1.02388	0.876617	0.901493	0.856716	1.44975
ILMN_1726266	ADAM12	1.07463	0.954229	0.911443	0.935323	1.09751	1.04577	1.55522	0.875622	0.936318	0.866667	0.80995	0.832836	0.854726	0.963184	0.919403	1.41791
ILMN_1705689	ADAM12	1.05075	0.98209	0.920398	1.04179	0.900498	0.921393	2.36716	0.910448	0.905473	0.876617	0.953234	0.842786	0.908458	0.971144	0.899502	2.03682
ILMN_1785393	ADAM12	0.876617	0.942289	0.865672	0.921393	0.895522	0.80398	1.26866	0.835821	0.893532	0.80796	0.78209	0.885572	0.810945	0.830846	0.778109	1.07761
ILMN_2384544	ADAM15	1.49751	1.4408	0.987065	1.14229	1.6398	1.2597	2.29154	1.33134	1.64677	1.22587	0.954229	1.30547	1.50547	1.50945	1.22587	1.74826
ILMN_1756920	ADAM15	14.3085	13.59	6.86368	14.6378	11.7701	18.4119	10.7144	11.7502	15.5224	13.7791	11.407	16.1274	12.3881	11.8119	15.3184	12.2537
ILMN_1751500	ADAM15	1.40299	1.39502	1.04478	1.17512	1.19502	1.19204	1.49453	1.2597	1.29552	1.19303	1.15423	1.22886	1.43881	1.34925	1.21194	1.61493
ILMN_2121068	ADAM17	3.10149	2.41692	1.88856	2.85174	2.50448	3.15423	4.20498	3.87065	3.59502	2.17811	2.19701	3.8806	1.99104	2.88756	2.28557	4.47363
ILMN_2201386	ADAM18	0.910448	0.913433	0.938308	0.934328	0.964179	0.949254	1.06368	0.933333	0.926368	0.910448	0.899502	0.944279	0.98408	0.875622	0.920398	1.01791
ILMN_1682225	ADAM19	1.16219	0.931343	0.928358	1.01592	1.1403	0.983085	2.05373	1.09353	0.934328	0.929353	0.878607	0.942289	0.870647	1.01194	0.910448	1.94129
ILMN_1788481	ADAM19	0.889552	1.03184	0.978109	0.910448	0.925373	0.952239	1.31642	0.935323	0.960199	0.932338	0.823881	0.867662	0.910448	0.919403	0.945274	1.16716
ILMN_1713751	ADAM19	28.59	17.396	17.9522	18.4458	18.61	20.4716	28.4617	23.1502	14.798	20.9841	19.8219	45.3323	16.0826	26.2418	14.8577	26.81
ILMN_1662675	ADAM2	1.10746	1.07065	1.05473	0.987065	0.912438	1.00299	1.40697	0.976119	1.03284	0.919403	0.863682	0.910448	0.861692	0.98607	0.965174	1.30448
ILMN_1737629	ADAM20	0.866667	0.816915	0.834826	0.867662	0.893532	0.927363	1.33532	0.841791	0.929353	0.78209	0.883582	0.920398	0.719403	0.910448	0.851741	1.10149
ILMN_1812112	ADAM21	1.22587	1.06567	1.09751	1.15622	1.22289	1.05274	1.35721	1.10846	1.04776	0.960199	0.892537	1.12239	0.978109	1.13632	1.00896	1.44975
ILMN_1675210	ADAM22	0.837811	0.901493	0.80597	0.882587	0.970149	0.941294	1.19801	0.850746	0.913433	0.841791	0.757214	0.966169	0.842786	0.946269	0.894527	1.12438
ILMN_1706302	ADAM22	0.951244	0.781095	0.853731	0.806965	0.889552	0.881592	1.16915	0.836816	0.843781	0.859701	0.748259	0.883582	0.922388	0.871642	0.877612	1.17612
ILMN_2351754	ADAM22	1.06368	1.10149	0.963184	1.0796	0.917413	0.901493	1.57512	0.821891	0.960199	0.806965	0.753234	1.16816	0.978109	0.865672	0.897512	1.93333
ILMN_2060086	ADAM23	1.11642	0.987065	0.919403	0.99403	1.02289	1.04378	1.09751	0.974129	1.00398	0.972139	0.886567	1.08756	1.0806	0.916418	0.972139	1.1194
ILMN_1664236	ADAM28	1.09254	1.07463	1.04378	1.3194	0.973134	1.13234	1.37114	1.25572	1.27363	1.01791	0.930348	1.27662	0.926368	1.01194	1.21095	1.1393
ILMN_1664631	ADAM28	0.985075	0.936318	0.842786	1.27662	0.904478	0.836816	1.87761	1.0806	1.001	0.858706	0.897512	1.01294	0.903483	0.931343	0.938308	1.4995
ILMN_1802100	ADAM28	1.06368	0.905473	1.04279	1.04478	0.958209	0.985075	1.46269	0.938308	0.960199	0.850746	0.814925	1.36617	1.02488	0.946269	1.08856	1.27264
ILMN_2194158	ADAM29	1.1592	0.940299	0.950249	1.0995	0.945274	0.918408	1.44577	0.957214	0.930348	0.945274	0.802985	0.838806	0.881592	0.927363	1.03582	1.39701
ILMN_2100871	ADAM30	1.02687	0.919403	0.947264	1.0199	0.950249	0.913433	1.00995	0.949254	0.924378	0.960199	0.893532	0.98408	0.882587	1.00299	0.958209	0.976119
ILMN_1806841	ADAM32	1.0607	0.953234	0.902488	0.99801	0.906468	0.9801	1.32537	1.02388	1.05174	0.944279	0.787065	0.98209	0.860697	0.932338	0.942289	1.24279
ILMN_2293012	ADAM32	0.934328	0.858706	0.739303	0.942289	0.852736	0.797015	1.77214	0.896517	0.80398	0.731343	0.717413	0.844776	0.710448	0.81393	0.878607	1.46567
ILMN_1651657	ADAM33	1.1602	1.09353	1.14527	1.23284	1.20498	1.2597	1.46965	1.37711	1.15423	1.19104	1.05075	1.06269	0.957214	1.09851	1.16915	1.31642
ILMN_1671297	ADAM33	1.05473	1.01095	1.05572	1.07562	1.10249	1.09652	1.76219	1.0398	1.12736	1.001	0.907463	1.0796	1.05672	1.01294	0.974129	1.54229
ILMN_1669486	ADAM3A	0.833831	0.956219	0.866667	0.80597	0.877612	0.806965	1.27463	0.8199	0.865672	0.741294	0.767164	0.750249	0.816915	0.79005	0.837811	1.0597
ILMN_2223911	ADAM3A	0.887562	0.933333	0.924378	0.893532	0.903483	0.954229	1.1204	0.850746	0.859701	0.861692	0.821891	0.852736	0.904478	0.880597	0.864677	1.09453
ILMN_2302214	ADAM5P	0.924378	0.912438	0.835821	0.864677	0.874627	0.854726	1.21592	0.973134	0.830846	0.835821	0.745274	0.907463	0.766169	0.847761	0.79204	1.05373
ILMN_2143210	ADAM6	1.07861	0.929353	1.01294	1.01891	0.975124	0.944279	1.49353	1.00199	0.941294	1.02388	0.891542	0.950249	0.964179	0.940299	0.999005	1.56617
ILMN_1750294	ADAM7	2.1602	1.38905	1.07363	1.24279	1.93433	1.71741	2.34627	1.55025	2.14627	1.15323	1.38308	2.17313	1.85373	2.4199	1.44478	2.52836
ILMN_1708348	ADAM8	22.4826	22.1045	11.4587	14.3741	17.9214	16.9891	19.0398	19.2567	17.6925	16.195	23.9881	26.6706	12.3622	20.6308	15.3313	19.4239
ILMN_1727524	ADAM9	1.35224	1.19801	1.18507	1.29851	1.21692	1.3403	1.77711	1.23781	1.11343	1.13035	1.02985	1.39701	1.01493	1.16816	1.15423	1.4
ILMN_2103107	ADAMDEC1	1.08358	0.941294	0.958209	0.919403	0.954229	0.958209	1.28458	0.888557	0.934328	0.80199	0.820896	0.936318	0.933333	0.947264	0.858706	1.20796
ILMN_1673566	ADAMTS1	1.06667	0.973134	0.929353	0.849751	1.06169	1.09254	1.71343	0.99602	0.913433	1.04677	0.872637	1.03184	0.896517	0.944279	0.957214	1.6796
ILMN_1751168	ADAMTS10	1.14826	1.19403	1.11741	1.0199	1	1.04577	1.56915	0.997015	0.943284	0.905473	0.860697	1.05771	1.04876	0.951244	1.13333	1.38607
ILMN_1660970	ADAMTS12	0.874627	0.873632	0.871642	0.833831	0.872637	0.889552	1.33831	0.877612	1.04876	0.791045	0.828856	1.00299	0.821891	0.981095	0.823881	1.1602
ILMN_1787386	ADAMTS13	0.934328	0.870647	0.795025	0.821891	0.976119	0.99204	2.18905	0.99403	0.916418	0.898507	0.829851	0.926368	0.830846	0.886567	0.826866	1.75423
ILMN_2286570	ADAMTS13	1.02488	0.821891	0.873632	0.79204	0.884577	1.02488	1.05174	0.905473	0.958209	0.870647	0.769154	0.966169	0.849751	0.827861	0.866667	0.891542
ILMN_2413732	ADAMTS13	1.37711	1.30647	1.18806	1.21791	1.21095	1.27463	2.05771	1.31542	1.29154	1.07761	1.12139	1.20995	1.31642	1.2199	1.11144	1.91343
ILMN_1676452	ADAMTS14	1.00498	0.844776	0.896517	0.880597	0.890547	0.80199	1.21194	0.865672	0.934328	0.875622	0.775124	0.888557	0.881592	0.947264	0.841791	1.30846
ILMN_2358134	ADAMTS14	0.894527	0.930348	0.773134	1.0199	0.884577	0.949254	1.80398	0.884577	0.959204	0.746269	0.78607	0.926368	0.80398	0.836816	0.848756	1.68259
ILMN_1683781	ADAMTS15	1.0398	0.918408	0.886567	0.98607	0.940299	0.909453	1.36716	0.79801	0.858706	0.754229	0.909453	0.868657	0.892537	0.900498	0.869652	1.34129
ILMN_1726247	ADAMTS16	1.07264	0.942289	1.21592	1.05871	1.08557	0.99602	1.19602	0.978109	1.01393	0.942289	0.909453	0.965174	1.02388	0.945274	1.06468	1.25274
ILMN_1682989	ADAMTS17	1.20299	1.28657	1.15423	1.07662	1.24279	1.31642	1.54527	1.13731	1.24677	1.06468	1.03582	1.07662	0.949254	1.09353	1.13333	1.51443
ILMN_1739872	ADAMTS18	1.04279	0.909453	0.981095	1.02985	1.02587	1.05871	2.11841	0.993035	1.08657	1.00697	0.966169	0.945274	0.861692	0.928358	1.05871	1.73035
ILMN_1770152	ADAMTS18	0.966169	0.872637	0.966169	0.812935	0.898507	0.958209	1.15522	0.849751	0.948259	0.837811	0.910448	0.847761	0.837811	0.831841	0.897512	1.22985
ILMN_1656171	ADAMTS19	1.07264	1.20796	1.12537	1.02587	1.09154	1.1403	1.54627	1.28955	1.05274	1.11045	1.05174	1.13433	1.0398	1.14229	1.17612	1.43284
ILMN_1796628	ADAMTS2	0.98408	0.999005	0.946269	0.926368	0.99801	0.933333	1.2398	0.997015	0.964179	0.928358	0.837811	0.985075	0.856716	1.00896	1.00697	1.27562
ILMN_1811765	ADAMTS2	0.916418	0.834826	0.867662	0.920398	0.864677	0.791045	1.18507	0.80398	0.79801	0.745274	0.80398	0.925373	0.81791	0.8199	0.902488	0.969154
ILMN_1787908	ADAMTS20	0.983085	1.01194	0.917413	1.02786	0.919403	1.0199	1.3602	0.98607	0.861692	0.910448	0.977114	0.826866	0.821891	0.933333	0.965174	1.52438
ILMN_1651717	ADAMTS20	0.899502	0.834826	0.822886	0.841791	0.851741	0.858706	1.22189	0.826866	0.887562	0.836816	0.732338	0.80995	0.740299	0.836816	0.79403	1.1204
ILMN_1703803	ADAMTS3	0.932338	0.785075	0.904478	0.9801	0.952239	0.875622	1.63085	0.848756	0.873632	0.901493	0.820896	0.874627	0.827861	0.869652	0.738308	1.37214
ILMN_2092933	ADAMTS4	1.51642	1.1602	1.41194	1.24776	1.21891	1.38209	1.07761	1.26965	0.975124	1.42985	0.898507	0.972139	1.4	1.39403	1.04776	1.21294
ILMN_1681886	ADAMTS5	0.945274	0.968159	0.959204	0.916418	0.995025	0.907463	0.939303	0.953234	0.899502	0.860697	0.855721	1.02587	0.80796	0.940299	0.915423	1.08557
ILMN_1767362	ADAMTS6	1.09652	1.06368	0.963184	1.01592	1.05672	0.917413	1.64179	1.11144	0.958209	1.06667	0.814925	1.02189	0.872637	0.957214	0.871642	1.50149
ILMN_2211790	ADAMTS7	0.98408	0.826866	0.881592	0.941294	0.837811	0.901493	1.61592	0.838806	0.915423	0.808955	0.793035	0.79602	0.845771	0.857711	0.822886	1.33831
ILMN_1672403	ADAMTS8	1.13234	0.931343	1.09254	0.978109	1.01294	1.0398	1.23582	0.99602	0.973134	0.995025	0.79403	1.00796	0.975124	0.875622	1.00896	1.12537
ILMN_1805543	ADAMTS9	0.937313	0.849751	0.854726	0.903483	0.962189	1.02587	1.2995	0.970149	0.999005	0.974129	0.743284	0.890547	0.840796	0.945274	0.999005	1.16816
ILMN_1706992	ADAMTSL1	0.960199	1.04975	0.944279	0.954229	0.877612	0.944279	1.37114	0.914428	0.913433	0.954229	0.933333	1.00995	0.956219	0.870647	0.854726	1.14627
ILMN_1684919	ADAMTSL1	0.795025	0.78806	0.964179	0.867662	0.865672	0.950249	1.19602	0.831841	0.80796	0.80199	0.78408	0.936318	0.800995	0.873632	0.829851	1.10647
ILMN_1705250	ADAMTSL1	0.983085	0.960199	0.866667	0.931343	0.854726	0.910448	1.24975	0.944279	0.897512	0.879602	0.872637	0.81791	0.823881	0.972139	0.897512	1.17214
ILMN_1722621	ADAMTSL1	0.885572	0.874627	0.885572	0.833831	0.879602	0.79602	1.22886	0.769154	0.837811	0.78408	0.78209	0.828856	0.831841	0.829851	0.857711	1.10945
ILMN_1721495	ADAMTSL2	0.897512	0.905473	0.902488	1.05473	0.825871	0.923383	1.19204	1.04776	1.02488	0.970149	0.864677	0.970149	0.844776	0.956219	0.879602	1.08358
ILMN_1798690	ADAMTSL3	0.985075	0.936318	0.907463	0.908458	0.945274	1.11144	1.66567	1.0199	1.28159	0.806965	0.708458	0.869652	0.831841	0.981095	1.01095	1.69154
ILMN_1687035	ADAMTSL4	1.13632	1.08955	1.13333	1.50249	1.17214	1.38308	1.68358	1.28259	1.24677	1.24378	1.16119	1.48856	1.09353	1.17214	1.0995	1.46169
ILMN_1777683	ADAMTSL4	1.02388	0.975124	0.923383	0.983085	1.04279	1.01393	1.32637	0.917413	1.04279	0.890547	0.938308	0.969154	0.975124	1.00697	0.933333	1.04876
ILMN_1762294	ADAMTSL4	1.2597	1.1204	0.997015	1.37313	1.07463	1.21095	1.35821	1.15323	1.21194	1.16119	1.13831	1.40995	1.02388	0.985075	1.06965	1.37512
ILMN_1793040	ADAMTSL5	0.976119	0.987065	0.941294	1.11343	1.19303	1.0806	1.52736	1.09552	1.06766	1.02289	0.926368	1.01095	1.01891	1.08955	1.18806	1.37214
ILMN_1763000	ADAP2	5.31443	4.66169	2.78507	9.59701	4.12338	7.34428	5.43284	4.399	4.44378	5.3204	4.63582	7.86866	5.21891	5.66269	3.44279	5.86269
ILMN_1776777	ADAR	51.0159	34.8706	28.9075	61.9871	29.7493	57.2219	45.6796	39.6308	38.4388	29.6119	38.1323	84.6388	40.6507	35.4836	35.0109	47.8856
ILMN_1706963	ADAR	1.09453	0.926368	0.939303	1.01294	0.855721	1.00398	1.74229	0.785075	0.887562	0.78408	0.736318	0.878607	0.874627	0.864677	0.847761	1.41294
ILMN_2320964	ADAR	25.7323	17.8269	15.7204	29.5602	16.9095	20.8	15.1751	19.5493	22.7821	18.9572	25.9662	57.8338	25.0587	21.9045	18.5095	14.6498
ILMN_1697628	ADARB1	1.09652	1.01692	0.935323	1.12836	1.001	1.06567	1.30647	0.974129	1.00498	0.859701	0.930348	0.949254	0.884577	0.949254	0.846766	1.25672
ILMN_2319326	ADARB1	2.42289	1.9801	1.49453	2.19204	1.72935	2.16219	1.79801	2.08756	2.29652	1.48557	1.53333	3.10149	1.73632	1.801	2.00995	1.5403
ILMN_1657442	ADARB1	1.0408	0.891542	0.810945	0.905473	0.889552	0.925373	1.14925	0.938308	0.913433	0.846766	0.908458	1.10547	0.881592	0.951244	0.897512	1.08756
ILMN_1679797	ADARB1	6.06169	5.53532	2.48358	6.41592	4.52338	5.34627	5.95522	6.08657	5.61095	3.80597	3.95224	9.15721	4.43184	5.17114	5.3403	5.59701
ILMN_1749493	ADARB2	1.04279	1.35025	1.08458	1.21393	1.04776	1.03483	1.95423	0.953234	1.21493	0.938308	0.864677	0.848756	0.769154	0.939303	1.04876	1.66667
ILMN_1657139	ADAT1	3.97811	3.0995	1.96418	3.26169	2.78209	4.02388	3.55622	3.17711	4.11144	1.96716	3.38806	5.89453	2.75124	3.61095	3.82985	2.7194
ILMN_1806275	ADAT3	1.37214	1.5592	0.888557	1.20896	1.31045	1.27065	1.53234	1.28856	1.60498	1.17015	1.44677	1.57313	1.17413	1.16219	1.12338	1.76418
ILMN_1659599	ADC	1.03781	1.1592	0.933333	1.12537	1.19104	0.939303	1.44975	1.00796	0.98209	0.981095	1.01294	0.930348	1.01294	0.979104	1.09353	1.16219
ILMN_1698777	ADCK1	1.66667	1.599	1.24478	1.65771	1.22886	1.47562	1.85572	1.58308	1.86368	1.24776	1.65672	1.71741	1.41095	1.51443	1.60398	1.79403
ILMN_1663132	ADCK2	4.57512	4.93532	1.8806	4.32836	3.55423	5.02189	2.60299	3.85672	5.61393	3.28955	3.38209	5.56716	3.37413	3.72438	3.67562	4.04776
ILMN_1700349	ADCK4	1.68358	1.71741	1.30945	1.44378	1.98308	1.39801	2.04478	1.7602	1.98109	1.41294	1.41891	2.09552	1.20199	1.39701	1.53433	2.42289
ILMN_1761309	ADCK5	1.45871	1.56716	1.14726	1.54726	1.33831	1.29552	1.80199	1.34229	1.55124	1.10746	1.19403	1.62189	1.26567	1.28557	1.35622	1.90348
ILMN_2120555	ADCY1	0.969154	0.930348	0.956219	0.885572	0.948259	0.79403	1.37512	0.831841	0.781095	0.836816	0.826866	0.878607	0.842786	0.859701	0.855721	1.25075
ILMN_1810691	ADCY2	1.24975	1.46965	1.35323	1.75323	1.33035	1.61692	1.92637	1.22388	1.29154	1.35323	1.21493	1.29055	1.19801	1.29751	1.01194	1.44776
ILMN_1676893	ADCY3	5.57612	4.89055	3.29851	5.24975	4.52239	5.57711	5.62488	5.30846	6.49254	3.38408	3.73333	5.03184	4.37313	3.85572	4.85572	5.00995
ILMN_2148944	ADCY4	1.89652	1.59801	1.57512	2.50149	1.64478	1.8398	2.11244	1.70348	2.38209	1.57711	1.79801	3.25274	1.93831	1.54527	1.96517	2.1204
ILMN_1708588	ADCY5	0.955224	0.825871	0.824876	0.8	0.958209	0.860697	1.22488	0.862687	0.883582	0.78408	0.806965	0.943284	0.838806	0.894527	0.886567	0.995025
ILMN_2311674	ADCY6	1.07164	0.999005	1.01692	0.98209	1.0398	0.954229	1.16517	0.862687	1.04776	1.02388	0.979104	0.946269	0.897512	0.937313	0.864677	1.10249
ILMN_1685156	ADCY6	1.04975	0.907463	0.98209	0.962189	0.919403	0.966169	1.33433	1.07861	1.06866	1.01791	0.868657	1.02388	0.941294	0.987065	0.954229	1.31741
ILMN_1655935	ADCY7	2.99104	2.05174	2.06169	3.59502	2.48159	3.12537	3	2.32935	2.43383	2.45871	2.17612	4.40199	2.51244	2.08458	2.26368	2.83582
ILMN_1754440	ADCY8	0.983085	0.906468	0.985075	0.969154	0.930348	0.888557	1.12239	0.958209	0.975124	1.05075	0.859701	0.823881	0.929353	0.964179	0.975124	1.03582
ILMN_1654287	ADCY9	1.24378	1.09055	1.18408	1.24179	1.38806	1.25174	1.6398	1.13234	1.28557	1.00498	1.15224	1.63682	1.05871	1.14527	1.11045	1.61493
ILMN_1763344	ADCYAP1	1.09055	0.947264	0.979104	0.989055	0.977114	0.99403	1.35821	1.09652	0.955224	0.873632	0.943284	1.08259	0.897512	0.851741	1.04975	1.11542
ILMN_1711736	ADCYAP1R1	0.961194	0.908458	0.963184	0.948259	0.98607	0.978109	1.53234	0.919403	0.938308	0.914428	0.888557	1.15622	0.841791	0.919403	0.991045	1.3393
ILMN_2356786	ADD1	2.00199	2.11443	1.3801	1.29353	1.76915	1.49154	2.58607	1.65075	2.26169	1.51244	1.58408	1.97114	1.4199	1.73831	1.62189	2.15522
ILMN_1759252	ADD1	49.7025	42.5333	34.2239	42.2527	37.8458	54.9542	56.1771	46.803	51.7433	41.1323	39.593	69.4199	36.2557	49.3761	36.4557	68.7821
ILMN_1678791	ADD2	0.972139	0.874627	0.863682	0.898507	0.884577	0.894527	1.41393	0.901493	0.886567	0.864677	0.822886	0.806965	0.808955	0.926368	0.78209	1.24478
ILMN_2336146	ADD2	1.28756	0.920398	0.856716	0.839801	0.979104	0.970149	1.17114	0.949254	0.896517	0.959204	0.773134	0.965174	0.886567	1.11443	0.827861	1.22388
ILMN_2286339	ADD2	1.11045	1.06866	0.856716	0.932338	0.974129	0.910448	1.2607	0.866667	0.825871	0.838806	0.81194	0.934328	0.879602	1.06766	0.865672	1.49552
ILMN_1694133	ADD2	1.27264	0.956219	0.929353	0.918408	1.001	0.925373	1.5592	0.914428	0.925373	0.892537	0.906468	0.949254	1.00398	1.06468	0.978109	1.58905
ILMN_1678501	ADD3	1.0597	0.99005	0.888557	1.01393	0.967164	0.948259	1.32537	0.995025	1.04577	0.966169	0.887562	0.951244	0.947264	0.954229	0.959204	1.17413
ILMN_1787378	ADD3	8.09353	3.97214	4.29055	8.46766	4.12338	8.94428	5.12935	6.95821	5.83781	4.36816	6.87065	15.4637	6.42886	6.27065	6.53632	5.16219
ILMN_1814526	ADD3	11.7672	7.72637	5.7602	13.3682	8.09851	11.5095	15.2259	13.2418	10.6607	7.27065	7.95721	17.21	9.37313	9.24279	9.61891	14.61
ILMN_2311278	ADD3	4.82985	2.06468	3.33134	7.30249	2.38905	8.2597	3.43881	3.4806	3.26766	4.05771	3.82786	10.5204	4.68159	3.68756	3.72139	2.76915
ILMN_2138765	ADFP	7.54627	4.07562	3.58905	6.37214	6.35323	7.22786	6.35821	7.09055	5.6199	6.14229	5.32139	11.0935	5.99204	7.96119	5.26965	6.03085
ILMN_1764309	ADH1A	0.916418	0.962189	0.825871	0.959204	0.884577	0.900498	1.31841	0.934328	0.937313	0.827861	0.863682	0.874627	0.771144	0.858706	0.882587	1.20896
ILMN_1811598	ADH1B	1.03284	0.969154	0.810945	0.902488	0.968159	0.848756	1.1403	0.892537	0.903483	0.892537	0.779104	0.890547	0.874627	0.847761	0.913433	1
ILMN_1740717	ADH1C	0.79602	0.859701	0.853731	1.06368	0.889552	0.919403	1.1393	0.871642	0.823881	0.810945	0.719403	0.930348	0.699502	0.857711	0.8199	1.08159
ILMN_2136010	ADH4	0.951244	0.891542	0.911443	0.951244	0.943284	1.01393	1.03383	1.05672	1.05373	0.79602	0.873632	0.946269	0.893532	0.919403	1.01891	1.09055
ILMN_1738604	ADH5	1.31841	1.01095	1.16219	1.12239	1.28856	1.23582	1.75721	1.01294	1.01095	0.922388	0.991045	1.26269	1.1393	1.13234	0.942289	1.81493
ILMN_1691175	ADH6	1.1801	1.21493	1.16219	0.960199	1.16816	1.01393	1.53731	1.02388	1.08159	1.07363	0.971144	0.898507	0.944279	1.09652	1.05174	1.30149
ILMN_2223359	ADH7	1.01493	0.911443	0.902488	0.795025	0.901493	0.915423	1.11841	0.823881	0.841791	0.852736	0.844776	0.927363	0.802985	0.904478	0.920398	1.25871
ILMN_1702858	ADHFE1	1.72239	1.52637	1.42189	2.78507	1.69453	2.79801	2.49453	2.38109	2.40995	1.27363	2.18408	2.63284	1.84677	2.04179	1.96517	2.55622
ILMN_2363634	ADHFE1	1.11741	1.06965	1.00398	1.42388	1.07662	1.45672	1.57512	1.36119	1.51741	0.929353	1.08259	1.27562	0.962189	1.16716	1.19801	1.40796
ILMN_1813975	ADI1	1.16418	1.09254	0.955224	1.10249	1.20896	1.1602	1.15025	1.13234	1.40995	1.12935	0.964179	1.25572	1.04179	1.2408	1.07363	1.25871
ILMN_1743331	ADIG	1.10647	1.04478	1.02587	1.09751	1.03483	1.04478	1.28557	1.04179	1.03085	1.02587	0.887562	1.12537	0.967164	0.959204	0.950249	1.26866
ILMN_1775045	ADIPOQ	1.28856	1.23284	1.17313	1.47065	1.19701	1.31144	1.71642	1.19502	1.36318	1.0209	0.997015	1.22587	0.991045	1.11642	1.06965	1.4806
ILMN_2096322	ADIPOR1	53.8448	39.7174	55.1512	41.0159	44.0239	58.9493	59.0209	50.5134	65.7224	63.995	37.5045	134.132	40.2289	72.598	73.4826	64.996
ILMN_2224833	ADIPOR2	8.07264	5.91343	5.05771	6.97413	6.23284	7.46965	7.52338	7.08259	9.3592	5.49851	6.44975	14.2328	5.73035	6.69254	6.37512	7.51542
ILMN_1768062	ADK	0.967164	0.889552	0.856716	0.894527	0.938308	0.865672	1.50547	0.865672	0.860697	0.99602	0.898507	1.02886	0.902488	0.840796	0.929353	1.17214
ILMN_2358628	ADK	0.920398	0.916418	0.849751	0.832836	1.01493	0.905473	1.45473	0.838806	0.911443	0.81592	0.844776	0.899502	0.78408	0.883582	0.79801	1.13035
ILMN_1801020	ADK	1.26169	1.17512	1.0408	1.40498	1.05771	1.49154	1.53632	1.04975	1.41891	1.31343	1.03881	1.58408	1.39701	1.06169	1.17512	1.29254
ILMN_1708934	ADM	23.6269	18.2507	18.9095	25.1443	17.6537	28.2667	23.1164	16.7005	15.7353	35.7751	38.6179	65.1085	18.3652	16.9015	20.0428	32.0756
ILMN_1702933	ADM2	1.79104	1.56617	1.32637	1.52736	1.39801	1.49751	1.91144	1.6	1.56915	1.42985	1.2796	1.45871	1.40498	1.599	1.54229	1.85373
ILMN_1657993	ADNP	2.91642	2.09652	1.82886	2.74428	2.14925	3.5194	2.98109	1.89254	2.10149	2.13831	1.99104	4.39005	2.3403	2.73433	1.76318	2.39204
ILMN_1666019	ADNP	1.41692	1.03582	1.13035	1.51841	1.14129	1.35821	1.41891	1.2408	1.51642	0.970149	1.16119	2.73234	1.15124	1.21493	1.60697	1.32736
ILMN_2080751	ADNP2	3.21294	2.25672	1.96418	3.71045	2.88159	3.79204	3.12239	2.68856	2.79801	2.14826	2.40796	3.73831	2.65373	2.73532	2.44975	2.69552
ILMN_1690352	ADO	2.68358	2.17612	1.28358	2.53532	1.85672	2.07065	3.44677	2.30249	2.44975	1.73632	2.1204	3.3801	1.99403	2.44577	1.82488	3.12438
ILMN_2275396	ADORA1	0.915423	0.979104	0.909453	0.79403	0.920398	0.831841	1.24478	0.694527	0.81194	0.942289	0.834826	0.816915	0.866667	0.887562	0.939303	1.19403
ILMN_2373444	ADORA1	0.964179	0.886567	0.795025	0.908458	1.02587	0.859701	1.32239	0.872637	1.04776	0.895522	0.821891	0.864677	0.922388	0.958209	0.934328	1.34627
ILMN_1807372	ADORA2A	7.22985	7.1592	3.04577	3.57313	5.9393	4.51443	4.81592	6.66567	8.63582	5.49851	7.67761	7.63781	5.61592	6.55522	5.80796	4.46965
ILMN_1703946	ADORA2B	1.1403	1.06567	0.975124	1.0796	1.10945	1.37114	1.57015	1.19303	1.17413	1.07363	0.880597	1.22687	1.04478	1.02289	1.05174	1.64279
ILMN_1733259	ADORA3	1.18109	1.11343	0.963184	1.2607	1.65672	1.43682	1.65572	1.41891	1.15025	1.19403	0.851741	1.26567	1.05672	1.6199	1.03881	1.65075
ILMN_1730710	ADORA3	1.81592	1.399	1.7403	1.75124	1.92935	1.72338	2.40796	2.4607	1.6398	1.76119	1.42289	3.31045	1.58806	1.39104	1.43284	2.10448
ILMN_1793959	ADPGK	6.74925	5.45771	4.05274	7.62687	5.18308	7.11343	7.50448	6.97214	6.41194	4.25672	6.55124	11.7512	5.54328	7.66866	5.82587	6.19801
ILMN_1794512	ADPRH	1.1592	1.22687	1.02687	1.15622	1.09851	1.15821	3.93333	1.06766	1.16915	0.912438	0.920398	1.3592	0.954229	1.09851	1.05373	2.8408
ILMN_1795788	ADPRHL1	1.0209	0.908458	0.947264	0.953234	0.945274	0.870647	1.28358	0.890547	0.98607	0.828856	0.797015	0.911443	0.947264	0.863682	1.00299	1.21194
ILMN_1760335	ADPRHL1	0.987065	1.0209	0.909453	1.06468	0.98806	0.931343	1.21791	1.11244	1.001	0.865672	0.916418	1.00199	0.928358	0.946269	0.960199	1.2199
ILMN_1788530	ADPRHL1	1.1204	1.0398	1.03881	1.03781	0.978109	1.02985	1.55025	1.23383	1.10249	0.98408	0.909453	1.17711	1.01393	0.983085	1.08856	1.48756
ILMN_1811480	ADPRHL2	3.90547	2.86866	2.15821	3.40597	2.70249	3.27861	4.18209	2.59801	3.0995	2.34726	3.16617	5.1791	2.60498	2.66965	2.71443	3.42786
ILMN_1813598	ADRA1A	0.827861	0.816915	0.873632	0.80796	0.876617	0.831841	1.11841	0.835821	0.891542	0.78607	0.856716	0.79602	0.781095	0.904478	0.883582	1.1602
ILMN_1653821	ADRA1A	0.952239	0.906468	0.993035	0.938308	1.01891	0.892537	1.00398	0.917413	0.863682	0.838806	0.847761	1.01294	0.901493	0.860697	0.962189	1.12139
ILMN_1780551	ADRA1A	1.07761	0.894527	0.920398	0.991045	0.965174	1.16915	1.78706	1.07463	0.902488	0.81592	0.845771	0.916418	0.903483	0.864677	0.896517	1.49652
ILMN_1669227	ADRA1A	1.07363	1.22388	1.14925	1.29055	1.23383	1.10647	1.4796	1.15522	1.17811	1.10746	0.981095	1.1393	1.02289	1.16219	1.10348	1.37015
ILMN_1709167	ADRA1A	1.07363	0.99403	0.989055	1.14428	1.06269	0.985075	1.46169	0.906468	1.00597	0.864677	0.98408	1.02687	0.919403	1.07164	0.918408	1.38507
ILMN_1679754	ADRA1B	1.20597	1.15522	1.05174	1.0607	1.25572	1.00597	1.38109	1.19403	1.04975	1.02189	0.899502	1.07761	1.03781	1.12139	0.99403	1.25274
ILMN_1716421	ADRA1D	1.73035	1.27363	1.16318	1.70846	1.49851	1.56617	1.90746	1.38408	1.56816	1.30647	1.29453	1.80299	1.50746	1.24776	1.40398	1.94428
ILMN_1659371	ADRA2A	1.36318	1.5592	1.50945	1.14527	1.36119	1.2995	1.8995	1.58607	1.28458	1.27562	1.17313	1.1801	1.36219	1.4408	1.15721	1.90945
ILMN_1677868	ADRA2B	1.2209	1.11343	1.07363	1.01393	1.13234	1.15323	2.69154	1.11443	1.22488	1.0209	1.07264	0.99005	1.04478	1.20796	1.05871	1.9204
ILMN_1733963	ADRA2C	5.11841	4.65572	5.32338	2.53234	6.22189	4.5204	7.18806	4.57114	4.21194	4.6806	2.67861	2.54428	4.51443	6.33134	2.999	7.63781
ILMN_1804255	ADRB1	0.882587	1.00896	0.928358	0.937313	0.858706	0.923383	1.42189	0.890547	0.897512	0.81393	0.80398	0.967164	0.764179	0.888557	0.832836	1.07065
ILMN_1695590	ADRB2	7.4597	5.35124	3.06667	7.1602	5.59502	9.11343	8.1005	5.46667	7.99403	5.48557	5.83682	10.7801	5.66468	8.29453	5.36816	8.8199
ILMN_1694007	ADRB3	1.00697	0.975124	1.07065	0.924378	0.99801	0.905473	1.62786	0.915423	0.930348	0.913433	0.910448	0.98806	0.883582	1.06766	0.944279	1.40199
ILMN_1673330	ADRBK1	0.841791	0.893532	0.79403	0.837811	0.802985	0.836816	1.11741	0.7801	0.799005	0.827861	0.756219	0.913433	0.700498	0.797015	0.81393	0.947264
ILMN_1668900	ADRBK2	1.0597	0.7801	0.922388	0.880597	0.949254	0.959204	1.59403	0.902488	0.916418	0.806965	0.854726	1.05871	0.814925	0.925373	0.933333	1.26567
ILMN_2389013	ADRM1	4.13134	3.65473	2.19801	3.06866	3.47264	3.34428	4.09453	3.30249	3.63284	3.03881	3.22587	4.54527	2.82687	3.25473	3.02488	3.79005
ILMN_1760143	ADRM1	8.71045	7.56318	5.05075	6.99602	6.32736	8.53731	10.3692	6.14428	7.78209	5.73731	7.46567	11.4876	5.58607	7.00398	5.47264	10.1413
ILMN_1790757	ADSL	13.6229	9.59104	6.02388	12.5015	9.80896	10.2159	11.7751	12.0279	13.9204	9.56318	8.5801	15.2756	11.4856	10.8905	11.1095	11.0388
ILMN_2092664	ADSS	7.34826	5.46169	3.40896	7.15323	5.15622	8.60896	9.96318	6.98607	9.54129	4.25871	5.6597	11.1383	6.14328	8.42886	7.97811	8.27861
ILMN_1749804	ADSSL1	0.99204	1.00498	1.10846	0.955224	1.0408	0.940299	1.51841	1.0398	1.07363	0.901493	0.908458	0.936318	0.937313	0.953234	1.04577	1.43682
ILMN_1720235	ADSSL1	1.26368	1.05572	0.965174	1.13831	1.13333	1.04677	1.48557	1.06468	1.18607	0.983085	1.20896	1.04279	1.03582	1.15323	1.02886	1.50149
ILMN_2240009	ADSSL1	1.21791	0.975124	0.98408	1.06667	1.04677	1.06766	1.14726	0.953234	0.943284	1.02388	0.878607	1.03383	0.966169	0.960199	1.1791	1.14826
ILMN_1736178	AEBP1	1.45174	1.05572	0.897512	1.15124	1.02886	1.1602	1.96915	1.37811	1.15821	0.888557	0.81592	1.11045	0.987065	1.12836	1.20498	1.59801
ILMN_1803376	AEBP2	1.53234	0.966169	1.03582	1.35622	1.1393	1.1393	1.89652	1.30448	1.15323	0.968159	1.10547	1.61194	0.9801	1.17114	1.21194	1.69154
ILMN_1712944	AES	31.201	30.6378	7.57114	17.2607	26.391	20.9383	27.3512	26.0607	28.0955	13.9811	16.1811	21.81	18.9672	19.9821	19.7393	31.1264
ILMN_2333107	AES	15.2308	13.793	4.67761	9.50945	11.0965	10.8726	8.28358	10.5114	12.005	7.41493	9.04677	11.9015	9.72239	9.83284	8.84776	8.16318
ILMN_1707958	AES	0.964179	0.909453	0.938308	0.969154	0.869652	1.04975	1.13532	0.861692	1.01294	1.02488	0.876617	1.03682	0.969154	0.826866	1.00597	1.43284
ILMN_1660424	AFAP1	0.937313	0.855721	0.885572	0.970149	0.869652	0.833831	1.15124	0.877612	0.920398	0.898507	0.887562	0.888557	0.808955	0.883582	0.895522	1.03781
ILMN_1701998	AFAP1	1.47264	1.26567	1.23582	1.39602	1.52537	1.66368	1.60995	2.20796	1.72438	1.4199	1.1592	1.93134	1.17612	1.14428	1.38109	1.55622
ILMN_1651235	AFAP1	0.969154	0.991045	1.00796	0.950249	0.965174	0.866667	1.4199	1.001	0.932338	0.966169	0.835821	0.853731	0.872637	0.844776	0.914428	1.41891
ILMN_1694140	AFAP1L1	1.10945	1.09055	1.0607	1.10846	1.03383	1.01194	1.54129	1.09552	1.09453	0.973134	0.878607	0.936318	1.00597	1.05871	0.929353	1.46866
ILMN_1730995	AFAP1L2	1.71244	1.73731	1.34229	1.37711	1.80597	1.89254	1.8607	2.29851	1.77512	1.25274	1.31642	2.03184	1.43682	1.62587	1.44975	2.03284
ILMN_2404917	AFAP1L2	1.25572	0.983085	0.941294	1.1602	1.18806	1.24577	1.8995	1.11045	1.05473	1.08259	0.793035	1.31443	0.977114	0.942289	1.05871	1.37512
ILMN_1702696	AFAR3	1.20199	0.968159	0.953234	1.01095	1.05572	1.08657	2.51542	0.999005	1.09751	1.01891	0.907463	0.896517	1.01194	1.06368	1.07562	1.80398
ILMN_2084562	AFARP1	0.896517	0.99005	0.937313	1	0.969154	0.972139	1.31841	0.912438	1.04876	0.905473	0.706468	0.981095	0.889552	0.98209	0.966169	1.39701
ILMN_1769563	AFARP1	0.954229	0.943284	0.884577	0.834826	1.00498	0.893532	1.31244	0.947264	0.940299	0.898507	0.802985	0.921393	0.921393	0.838806	0.889552	1.19204
ILMN_2129015	AFF1	2.42786	1.33433	1.42488	2.80398	1.76617	2.94627	1.80498	2.12438	1.86567	2.16517	2.48657	4.74627	1.72338	1.67861	2.07562	1.58308
ILMN_1725889	AFF2	1.03682	1.01493	1.02189	1.04776	1.03184	1.05473	1.65174	1.09652	1.14428	0.969154	0.851741	0.966169	1.04179	1.00896	1.05075	1.44478
ILMN_1775235	AFF3	2.63184	1.54826	1.20597	2.12139	1.51144	1.6995	2.52935	1.90348	1.42587	1.42488	1.2209	2.12836	1.4209	1.5791	1.36318	1.93632
ILMN_1677951	AFF3	1.09353	0.850746	0.906468	1.04876	0.961194	0.806965	0.98209	0.899502	0.80398	0.900498	0.886567	0.943284	0.728358	0.844776	0.940299	1.17612
ILMN_1708502	AFF4	2.03881	1.31443	1.70149	2.63881	1.23483	2.35622	3.16915	1.55124	1.55522	1.36517	1.2607	3.0607	1.6209	1.35622	1.54627	2.65075
ILMN_1705447	AFG3L1	1.98408	1.55323	1.45771	2.83682	1.95423	2.30945	2.20697	2.55622	2.82687	1.78607	2.0209	3.35025	2.02886	2.04478	2.5204	2.05672
ILMN_1699172	AFG3L1	0.993035	0.987065	0.904478	1.14627	0.901493	1.16119	1.23383	1.07562	1.23184	0.956219	0.951244	1.22388	1.02985	0.946269	1.23483	1.19104
ILMN_2409898	AFG3L1	1.07562	0.959204	0.946269	0.9801	0.938308	0.920398	1.45473	0.950249	0.860697	1.00597	0.755224	0.915423	0.938308	0.861692	0.922388	1.27861
ILMN_2295698	AFG3L1	0.945274	0.918408	0.832836	0.901493	0.908458	0.993035	1.43582	0.787065	0.872637	0.970149	0.827861	0.887562	0.824876	0.976119	1.06965	1.30547
ILMN_2066124	AFG3L2	4.76816	4.85274	2.0597	4.3393	4.37811	3.76517	4.59602	4.51741	5.71841	3.61294	3.89254	5.1602	3.92637	4.18607	3.82587	4.28159
ILMN_1777797	AFM	0.779104	0.877612	0.81791	0.770149	0.831841	0.80995	1.04378	0.903483	0.712438	0.802985	0.756219	0.766169	0.764179	0.848756	0.78806	0.978109
ILMN_2095653	AFMID	3.0597	2.39005	2.39403	2.05174	2.43682	2.32438	2.74129	1.27463	1.63284	4.01891	1.16915	1.4607	2.5791	2.03284	1.35821	1.92836
ILMN_1782204	AFP	0.866667	0.946269	0.99403	0.966169	1.03184	1.03184	1.61592	1.02985	0.939303	0.962189	0.816915	1.02289	0.887562	0.879602	0.850746	1.40299
ILMN_2402766	AFTPH	6.80199	4.54527	3.47562	3.82687	4.6607	4.33731	5.50647	3.70249	4.55423	4.52537	3.59303	7.78408	4.01493	5.71343	3.63184	5.09652
ILMN_1767722	AFTPH	1.78706	1.29851	1.30945	1.61294	1.47861	1.62189	2.03383	1.34328	1.43682	1.45672	1.47463	2.74627	1.39005	1.61592	1.45572	1.71443
ILMN_2342841	AFTPH	1.76418	1.26368	1.2398	1.51443	1.40796	1.60597	1.77811	1.66866	1.44279	1.35124	1.17612	2.24279	1.26567	1.39104	1.47065	1.55025
ILMN_1802631	AGA	2.54925	1.72338	1.21493	2.2597	1.84677	2.11741	2.90945	1.74726	2.11144	1.49254	1.59005	2.76318	1.8	1.84577	1.91343	2.58408
ILMN_2318481	AGAP1	1.0607	0.922388	1.01393	0.935323	0.957214	0.926368	1.52438	0.914428	0.895522	0.884577	0.959204	0.872637	0.910448	0.905473	0.946269	1.43284
ILMN_2245223	AGAP1	0.933333	0.812935	0.869652	0.855721	0.882587	0.925373	1.23881	0.878607	0.949254	0.877612	0.773134	0.81592	0.806965	0.854726	0.812935	1.04577
ILMN_1735591	AGAP2	1.05572	0.976119	0.920398	1.00995	1.01493	1.00995	1.4209	1.07761	0.9801	0.930348	0.830846	0.888557	0.859701	0.869652	1.01592	1.47264
ILMN_2362126	AGAP3	1.05871	0.950249	0.893532	0.973134	0.983085	1.13035	1.38706	0.937313	1.08756	1.03483	0.789055	1.03582	0.993035	0.888557	0.907463	1.30348
ILMN_2269136	AGAP3	1.18706	1.02587	1.12935	1.18607	1.05373	1.17413	1.7801	1.14826	1.07562	1.06169	0.972139	1.19303	0.924378	1.0408	1.01692	1.79104
ILMN_2120103	AGAP7	1.06169	1.04577	0.985075	1.10746	1.19104	1.0199	3.16119	0.869652	0.939303	1.01692	0.896517	0.860697	0.902488	1.01194	1.02587	2.24179
ILMN_2100055	AGBL1	0.80995	0.81592	0.81393	0.895522	0.824876	0.80398	1.07761	0.960199	0.878607	0.763184	0.808955	0.821891	0.7801	0.847761	0.78607	1.02289
ILMN_1688627	AGBL2	1.04876	0.989055	0.991045	0.929353	0.882587	0.973134	1.28856	0.975124	0.905473	0.826866	0.8	0.951244	0.865672	0.857711	0.846766	1.13333
ILMN_2196642	AGBL4	0.954229	0.81592	0.896517	0.975124	0.831841	0.79005	0.977114	0.899502	0.860697	0.878607	0.746269	0.940299	0.737313	0.80398	0.883582	0.970149
ILMN_2308689	AGBL5	2.44975	2.54925	1.62388	1.77313	2.28756	2.19005	2.39801	2.86667	2.50945	2.50149	1.96318	3.3005	2.36219	2.41393	2.04577	2.67164
ILMN_2290776	AGBL5	1.37612	1.31741	1.1602	1.02985	1.32338	1.28657	1.60398	1.33134	1.41891	1.21194	0.985075	1.49751	1.12637	1.21692	1.1791	1.44677
ILMN_1777182	AGC1	1.16617	1.24378	1.10945	0.965174	1.10746	1.10547	1.29652	1.20995	1.08458	1.14925	1.03085	1.18408	1.00498	1.13731	1.17214	1.41592
ILMN_1729777	AGER	1.05771	0.846766	0.930348	1.01493	1.0607	0.907463	2.29552	0.951244	1.16915	0.995025	0.808955	0.99801	0.961194	0.971144	0.920398	2.11542
ILMN_2257015	AGER	1.66866	1.43184	1.19104	1.56318	1.59303	1.399	1.86368	1.83483	1.77015	1.28856	1.401	1.76617	1.24577	1.3791	1.32537	1.80398
ILMN_1652023	AGFG2	1.04478	1.08259	0.968159	0.892537	0.961194	0.928358	1.2398	0.850746	1.05473	1.00697	0.901493	0.900498	0.885572	1.02587	0.957214	1.19204
ILMN_1703228	AGFG2	1.46667	1.38806	1.17313	1.19204	1.40498	1.23483	1.74129	1.19303	1.50647	1.06269	1.37612	1.50846	1.1791	1.3801	1.16816	1.85771
ILMN_2064917	AGGF1	3.36716	2.12637	2.05075	3.64776	2.41294	3.5194	3.50846	2.62189	3.08756	2.18408	2.53731	5.17612	2.81493	3.0199	2.34726	3.13731
ILMN_1772645	AGK	2.28955	1.73532	1.37413	2.5194	2.19602	2.53632	2.90348	2.33134	2.56915	1.81791	2.41095	3.53731	2.02388	2.22388	2.05572	2.41692
ILMN_1680343	AGL	1.09453	1.1393	0.935323	0.930348	0.989055	0.808955	1.95124	0.882587	0.891542	0.965174	0.857711	1.08458	0.978109	0.923383	0.858706	1.63881
ILMN_2277492	AGL	0.98806	0.920398	0.897512	0.978109	1.03582	0.909453	1.37413	0.918408	0.913433	0.833831	0.879602	0.906468	0.865672	0.928358	0.963184	1.31741
ILMN_2371825	AGL	2.8209	2.18905	1.41791	2.60498	2.45075	2.27463	4.67662	3.02488	3.14328	1.74229	2.1801	4.0597	2.41592	2.38109	2.84179	4.33532
ILMN_1717468	AGL	0.981095	0.928358	0.873632	1.01194	0.977114	0.891542	1.59303	0.888557	0.936318	0.778109	0.895522	1.03881	0.898507	0.912438	0.914428	1.41095
ILMN_2274377	AGL	1.02687	0.99005	0.882587	0.974129	0.910448	0.905473	1.37214	1.06667	1.09055	0.868657	0.789055	0.951244	0.847761	0.966169	0.948259	1.34428
ILMN_1664006	AGL	1.28259	0.952239	1.0199	1.20597	1.0806	1.23483	1.3592	1.18806	1.36716	0.978109	0.952239	1.57313	0.98408	1.12239	1.17313	1.32438
ILMN_1707169	AGMAT	1.36915	1.20796	0.989055	1.46368	1.11841	1.27363	1.47562	1.30846	1.64478	1.17114	1.09652	1.44577	1.14229	1.11741	1.35323	1.49851
ILMN_1779109	AGPAT1	0.80199	0.80995	0.808955	0.846766	0.906468	0.8199	1.31144	0.755224	0.829851	0.845771	0.740299	0.835821	0.827861	0.765174	0.802985	1.24776
ILMN_1697790	AGPAT1	0.880597	0.79801	0.894527	0.870647	0.893532	0.874627	1.0398	0.864677	0.818905	0.963184	0.771144	0.887562	0.858706	0.883582	0.884577	1.08358
ILMN_1679520	AGPAT1	3.43582	3.76517	1.93632	2.38109	3.23582	2.21692	3.28358	3.70647	4.799	3.26567	2.95522	3.51343	2.68856	3.32438	3.08756	3.80299
ILMN_1732176	AGPAT2	2.97313	3.09851	2.16716	2.80896	2.8199	2.63184	2.6995	2.46169	3.16617	2.21791	2.88557	3.36617	2.47363	2.57413	2.53433	2.58806
ILMN_1681081	AGPAT2	2.35721	1.86468	1.5791	2.45771	1.62786	2.43881	1.96517	1.49751	2.19005	1.65572	2.0607	2.73632	1.57612	1.69851	1.3791	1.4
ILMN_2377430	AGPAT2	1.73035	2.16517	1.20896	1.87761	1.52139	1.62687	2.41095	1.94925	2.44776	1.65672	1.89552	2.1791	1.98308	1.88557	1.83383	2.82786
ILMN_1661373	AGPAT3	1.2408	0.98607	0.99403	1.16716	1.06567	1.18209	2.68358	0.955224	1.03085	1.1204	0.901493	1.08458	0.964179	0.983085	1.07662	2.48657
ILMN_2288175	AGPAT3	1.04677	1.00995	1.1204	1.0806	1.07861	1.15622	1.31045	0.946269	1.17214	1.06866	0.834826	1.09353	0.903483	1.08358	0.943284	1.32637
ILMN_1654010	AGPAT3	1.51443	1.51443	1.44577	1.9204	1.24776	2.08458	1.26766	1.50348	1.77413	1.99502	1.27861	2.29751	1.63483	1.58408	1.62388	1.19701
ILMN_1730504	AGPAT4	2.08557	1.90846	1.199	2.18507	1.7791	2.32836	2.44478	1.89751	2.09652	1.26667	2.11343	3.69851	1.58109	1.49751	1.90746	2.4806
ILMN_1662049	AGPAT5	1.60796	1.12139	1.05373	1.64378	1.17811	1.68159	1.51642	1.22687	1.34328	1.32935	1.13134	1.84677	1.33134	1.25373	1.34726	1.28458
ILMN_1740752	AGPAT6	1.15622	1.10746	1.13234	1.12338	1.02886	1.21194	1.66965	1.03582	1.04179	0.918408	0.969154	1.2199	0.967164	0.993035	0.918408	1.43483
ILMN_1794875	AGPAT9	6.91343	4.85174	4.20199	4.76219	5.03184	5.70945	7.11144	5.03085	5.7801	5.03881	4.52935	10.9741	3.89851	8.71542	3.82687	6.72537
ILMN_1698209	AGPS	2.33532	1.99204	1.66468	2.84677	2.17313	2.83085	2.30348	2.16318	2.88557	2.2607	1.7592	3.9005	2.47761	2.09453	2.20796	2.22189
ILMN_1814151	AGR2	1.36915	0.98209	1.06368	0.950249	1.01294	0.915423	2.61891	0.913433	1.01592	0.909453	0.878607	0.974129	0.81592	0.99005	0.956219	2
ILMN_2050246	AGR3	0.965174	0.882587	1.01692	0.827861	0.900498	0.956219	1.41891	0.869652	0.795025	0.894527	0.840796	0.908458	0.935323	0.889552	0.910448	1.18408
ILMN_2234605	AGRN	0.9801	0.907463	0.968159	0.7801	0.906468	0.880597	1.49453	0.78806	0.908458	0.917413	0.750249	0.927363	0.785075	0.842786	0.957214	1.14925
ILMN_1770336	AGRP	1.01692	0.900498	0.850746	0.895522	0.9801	0.966169	1.97711	0.870647	0.902488	0.821891	0.789055	0.949254	0.822886	1.0398	0.80199	1.66866
ILMN_1714253	AGRP	1.1602	0.963184	1.02289	0.987065	1.02587	0.934328	1.34229	1.08856	0.993035	0.952239	0.901493	1.00995	1.001	0.868657	0.99602	1.3393
ILMN_1813530	AGT	0.882587	0.857711	0.837811	0.757214	0.836816	0.868657	0.961194	0.79602	0.865672	0.704478	0.883582	0.848756	0.631841	0.883582	0.79801	0.946269
ILMN_2223922	AGTPBP1	1.23284	0.974129	0.909453	1.01791	0.993035	0.99602	1.68756	0.937313	1.03184	1.01294	0.927363	1.23383	0.889552	0.965174	0.950249	1.38408
ILMN_1814327	AGTR1	0.876617	0.892537	0.928358	0.924378	0.908458	0.836816	1.1194	0.856716	0.961194	0.81194	0.797015	0.919403	0.78209	0.869652	0.934328	1.01294
ILMN_2341343	AGTR1	1.001	0.894527	0.953234	1.03483	1.02985	0.942289	1.35622	0.845771	0.99005	0.979104	0.843781	0.951244	0.905473	0.900498	0.888557	1.28955
ILMN_1775634	AGTR2	1.28557	1.15124	1.04577	1.16617	1.12537	1.0199	2.59801	1.27363	1.11642	0.961194	1.09154	1.17015	1.14428	1.16418	1.001	2.06766
ILMN_1802458	AGTRAP	5.9194	5.76816	3.97413	3.84478	5.5403	5.08756	7.46269	4.18905	4.79204	5.65672	4.63682	6.15522	4.76219	5.12438	3.82687	7.73731
ILMN_2307656	AGTRAP	5.06169	4.82488	3.39204	3.61095	4.67761	4.11642	4.86269	3.35821	3.89453	4.75124	4.4995	6.47463	3.61692	4.4806	3.24776	5.29254
ILMN_1709796	AGXT	1.05771	1.02985	0.898507	0.867662	1.04677	0.955224	1.27861	1.02985	1.00199	0.905473	0.850746	1.05771	0.939303	1.05274	0.827861	1.26965
ILMN_1783963	AGXT2	0.886567	0.903483	0.947264	0.957214	0.909453	0.914428	1.23483	0.812935	0.882587	0.81393	0.824876	0.822886	0.765174	0.899502	0.880597	1.24876
ILMN_2134801	AGXT2L1	0.955224	0.918408	0.829851	0.962189	0.948259	0.806965	1.55821	0.766169	0.950249	0.828856	0.734328	0.776119	0.833831	0.8199	0.78806	1.26169
ILMN_1673529	AGXT2L2	3.92338	3.78706	1.93433	4.47861	3.9005	3.9204	3.83284	3.91343	5.07463	3.60995	3.59502	4.19005	3.90945	3.4199	4.17711	4.24776
ILMN_1686370	AGXT2L2	1.57512	1.35124	1.10149	1.88159	1.19303	1.39204	2.01692	1.30547	1.76318	1.47861	1.26866	1.55622	1.36318	1.34627	1.31244	1.68458
ILMN_1809139	AHCTF1	5.30547	3.72139	3.23881	4.07164	4.01493	4.46965	6.58209	3.801	3.83682	3.52338	5.54129	7.88756	3.50149	6.08856	3.53333	6.30746
ILMN_1747504	AHCTF1	4.85572	2.34726	3.64876	4.06766	3.16716	5.10547	2.62786	2.7204	2.98209	3.97313	3.6398	14.208	3.5801	4.24378	3.07363	2.90746
ILMN_1657862	AHCY	4.2806	3.80498	1.83284	3.9403	3.52338	1.96219	3.68358	3.71741	5.54925	3.25075	3.42587	6.68159	3.22886	3.58607	4.12139	3.26169
ILMN_1770412	AHCYL1	12.7493	10.8488	5.26169	9.43881	9.43383	9.7403	11.4418	10.4786	12.4716	7.3194	8.01294	15.9284	7.81393	11.1682	8.33831	11.5184
ILMN_1712786	AHCYL2	1.54129	1.30547	1.00199	1.52338	1.32537	1.31045	1.52935	1.39403	1.39801	1.17612	1.24179	2.47164	1.22886	1.30945	1.24378	1.72239
ILMN_1680111	AHDC1	1.48756	1.52935	1.24478	1.22786	1.2796	1.38209	1.45572	1.51045	1.47264	1.13532	1.10547	1.31343	1.14129	1.38408	1.31741	1.5204
ILMN_1791006	AHI1	1.17015	1.06269	0.905473	1.21294	1.01095	1.07065	1.33632	1.40299	1.29254	0.883582	0.965174	1.46766	1.0607	0.879602	1.10348	1.54129
ILMN_1714567	AHNAK	34.5741	27.2428	9.48955	34.7373	24.0517	37.4786	38.8846	25.3224	28.8408	20.9493	16.5791	24.4896	23.6478	27.3612	19.4985	39.0776
ILMN_1792495	AHNAK	2.15821	1.60398	1.42488	2.55025	1.53433	2.81194	2.11045	1.45373	1.63184	1.54726	1.50746	1.69652	1.82587	1.44876	1.63682	1.67861
ILMN_1752159	AHNAK	1.32338	1.46965	1.19403	1.51144	1.46866	1.47164	1.59204	1.36816	1.52239	1.21592	1.23085	1.29254	1.19104	1.28557	1.3801	1.60896
ILMN_2162799	AHR	1.35821	1.09154	1.03682	1.26368	1.12836	1.30647	1.38209	0.956219	1.09353	0.9801	0.983085	1.36318	0.989055	1.21592	1.10945	1.21194
ILMN_1782679	AHRR	0.916418	0.915423	0.888557	0.928358	0.907463	0.908458	1.3204	0.905473	0.923383	0.857711	0.870647	0.81791	0.783085	0.849751	0.974129	1.07662
ILMN_1703617	AHSA1	6.34826	5.84577	3.1791	5.1602	5.23582	5.29353	5.15522	4.69751	5.74925	3.77512	4.09552	7.93234	4.25174	5.47562	4.31841	4.91741
ILMN_1798308	AHSA2	2.29254	1.41592	1.25373	2.27562	1.56617	2.55025	3.40398	2.85672	1.95124	1.58209	2.05473	2.49751	1.69154	1.6607	2.23184	3.10746
ILMN_1730625	AHSG	1.13134	0.997015	0.963184	1.08557	1.19005	1.10945	1.57313	1.11443	0.911443	0.983085	0.963184	1.05274	0.931343	1.07463	0.944279	1.37313
ILMN_2164164	AICDA	0.937313	0.862687	0.875622	1.05771	1.01393	0.864677	0.99005	1.0398	0.929353	0.866667	0.922388	1.03184	0.841791	0.920398	0.81791	1.01393
ILMN_1703538	AIF1	40.3692	18.0945	17.2697	39.4229	19.9891	31.0229	22.796	15.597	27.7333	22.6607	14.8458	22.0846	24.8169	38.9761	27.5403	15.006
ILMN_1792473	AIF1	98.1493	80.1075	48.208	66.5642	64.9114	55.3801	111.975	69.1313	69.9254	96.1721	55.1801	66.5522	63.4726	120.914	65.0657	104.002
ILMN_1771827	AIF1	1.19602	1.06965	0.885572	0.949254	0.961194	1.07363	1.41194	1.07065	1.14826	0.953234	1.05672	1.14129	0.922388	1.13433	1.00597	1.34527
ILMN_2313821	AIFM1	4.23881	3.41692	2.15323	4.23284	3.58109	4.14527	3.82388	4.13532	5.47662	2.84378	3.28657	4.77612	3.44677	4.04478	3.33333	3.94627
ILMN_1717357	AIFM1	1.23284	1.09652	1.02886	1.46468	1.23483	1.42488	1.99701	1.23881	1.16517	1.16517	0.880597	1.24179	1.201	1.26269	1.09851	1.63781
ILMN_1668408	AIFM1	2.04179	1.66667	1.21692	1.83682	1.56219	1.77711	2.4995	1.80299	2.18607	1.53831	1.45473	2.09552	1.63881	2.0796	1.49055	2.21692
ILMN_1667183	AIFM1	0.962189	0.98806	0.906468	0.933333	0.923383	0.863682	1.88756	0.857711	0.79005	0.898507	0.814925	1.001	0.843781	0.825871	0.912438	1.64876
ILMN_1712639	AIFM2	1.03881	0.929353	0.935323	1.08557	1.14129	1.01592	1.28756	1.08657	1.06965	0.916418	0.932338	1.11343	0.909453	1.02587	0.942289	1.13433
ILMN_1704173	AIFM3	0.918408	0.895522	1.01791	0.98607	1.1592	0.897512	2.18507	0.956219	0.981095	1.02886	0.920398	1.07264	0.859701	1.03284	1.05075	2.30448
ILMN_1797974	AIG1	1.65274	1.40995	1.32438	1.45473	1.22388	1.45174	1.63483	1.29851	1.63881	1.46567	1.39104	1.61592	1.26866	1.26269	1.40597	1.75522
ILMN_1688625	AIM1	1.93333	1.67264	1.32537	1.84378	1.71045	1.93433	2.76219	1.65174	1.78507	1.42289	1.25373	2.25174	1.4806	1.85672	1.41493	2.39602
ILMN_1776916	AIM1L	0.947264	0.867662	1.0199	0.905473	1.00995	0.98806	1.14328	0.897512	0.961194	0.98607	0.861692	0.929353	0.814925	0.750249	0.872637	1.08358
ILMN_2113340	AIM1L	0.955224	1.10547	0.924378	1.03383	1.06368	1.04279	1.60597	0.99005	0.98607	0.939303	0.881592	0.985075	0.883582	1.07363	1.001	1.31741
ILMN_1669557	AIM1L	1.1393	1.05174	0.960199	0.968159	0.927363	0.991045	1.75124	0.930348	0.907463	0.773134	0.8199	1.08955	0.874627	0.891542	0.862687	1.45871
ILMN_2214232	AIM2	1.03085	1.00398	0.911443	1.07164	0.945274	0.958209	1.56716	0.991045	0.950249	0.947264	0.971144	0.944279	0.875622	0.946269	1.01294	1.57413
ILMN_2103841	AIP	17.5184	16.1692	6.83582	10.6199	12.8338	11.7453	17.0398	13.1861	17.3264	10.3373	10.808	15.9672	12.3851	14.5652	11.7592	17.8458
ILMN_2368268	AIPL1	0.948259	1.10348	0.987065	1.01891	1.07164	1.06368	1.07562	0.993035	0.955224	0.933333	0.750249	1.0995	0.932338	1.00498	0.99801	1.18209
ILMN_2415292	AIPL1	1.06468	1.0597	1.10547	0.929353	0.974129	0.99005	1.1403	1.00697	1.01194	1.01791	0.968159	0.960199	1.01194	1.12637	0.915423	1.15124
ILMN_1670282	AIRE	1.13234	1.07662	1.00199	1.15721	0.935323	1.05075	1.54925	1.09652	0.944279	1.00398	0.921393	1.00498	0.928358	0.917413	0.977114	1.52139
ILMN_2261519	AIRE	144.942	94.7542	95.7274	208.453	92.1851	229.971	120.902	163.192	191.957	119.621	109.748	191.037	97.7493	125.219	170.918	122.43
ILMN_1723521	AJAP1	0.945274	0.937313	0.831841	0.842786	0.940299	0.81393	1.01393	0.868657	0.816915	0.849751	0.822886	0.866667	0.830846	0.785075	0.814925	0.9801
ILMN_2242299	AJAP1	1.02985	0.865672	0.937313	0.883582	0.904478	0.911443	1.73433	0.99801	0.906468	0.873632	0.879602	0.888557	0.78607	0.858706	0.920398	1.45771
ILMN_2312764	AJAP1	1.11642	1.13333	1.13831	1.06667	1.15025	1.14328	1.71144	1.09353	1.19801	1.15522	0.834826	1.02985	0.979104	1.16119	1.11045	1.68159
ILMN_1779965	AK1	1.89652	2.56915	2.54826	2.41294	1.83184	2.87363	2.38109	2.22488	1.95124	2.18706	1.88259	3.31045	1.83483	2.42488	2.13035	2.50945
ILMN_1670542	AK2	2.04378	1.56716	1.11045	1.80896	1.76915	1.68756	2.68657	1.79204	2.30149	1.76219	1.26866	2.05075	1.42985	1.52637	1.54328	2.35423
ILMN_1655645	AK2	1.39403	1.25871	1.2806	1.54328	1.34627	1.40199	2.03085	1.4796	1.50846	1.30149	1.3005	1.86766	1.19403	1.35224	1.45075	1.81294
ILMN_1716053	AK2	5.22985	3.799	2.39701	4.82488	3.83881	4.17512	5.25572	3.92438	4.47065	3.71244	2.95323	6.1801	4.46766	4.21294	3.33632	4.95423
ILMN_1778173	AK3	4.74428	4.25672	2.63682	4.23284	4.15522	4.55522	5.77612	5.64179	6.48159	3.60498	4.24776	6.61692	4.14328	5.17811	5.5194	6.20199
ILMN_2338038	AK3L1	1.14129	1.15622	1.06269	1.15323	1.05771	1.16816	1.52239	1.00597	1.10547	0.951244	1.01493	1.27065	1.07761	1.25373	1.04478	1.49751
ILMN_1686522	AK3L1	0.766169	0.842786	0.838806	0.877612	0.893532	0.890547	1.48159	0.907463	0.831841	0.820896	0.80796	0.826866	0.836816	0.767164	0.861692	1.07463
ILMN_1656593	AK5	1.03383	0.902488	0.880597	1.01095	1.02388	0.955224	1.10746	0.876617	1.01393	0.918408	0.874627	0.968159	0.849751	0.863682	1.05075	1.11841
ILMN_2283473	AK5	0.937313	0.914428	0.98209	0.889552	0.750249	0.802985	1.04179	0.870647	0.775124	0.882587	0.777114	0.864677	0.890547	0.952239	0.894527	1.05075
ILMN_2387712	AK5	1.06269	1.01891	0.885572	1.10846	0.995025	1.001	1.25373	1.1403	1.07363	0.893532	0.98209	1.07065	1.0398	0.978109	1	1.10448
ILMN_1684305	AK7	0.98408	0.920398	0.810945	0.972139	1.0209	0.900498	1.45274	0.81592	0.911443	0.882587	0.869652	0.939303	0.878607	0.897512	0.844776	1.28856
ILMN_1712530	AKAP1	1.33731	1.18308	0.9801	1.19303	1.23383	1.14627	1.25075	1.23184	1.17214	1.25075	1.01294	1.20199	1.0796	1.09552	1.0796	1.3204
ILMN_1718808	AKAP10	2.00498	1.57313	1.44876	2.20896	1.74229	2.35323	1.88159	2.21692	1.55124	1.47164	1.79403	3.11841	1.79403	1.64179	1.5393	1.66567
ILMN_1783818	AKAP11	0.899502	0.833831	0.862687	0.869652	0.892537	0.783085	1.19602	0.884577	0.793035	0.869652	0.779104	0.844776	0.78408	0.80995	0.955224	1.11144
ILMN_2293758	AKAP11	3.16219	2.19801	1.48458	3.4398	2.04179	3.48557	3.40299	3.20896	3.29154	1.85373	2.30647	4.50647	2.60498	2.61393	2.52338	2.8
ILMN_2280189	AKAP11	1.06567	1.0796	0.933333	1.95124	1.03383	1.39502	1.25771	1.62189	2.10846	0.903483	1.24478	1.39303	1.03781	1.00398	1.88458	1.22687
ILMN_1715532	AKAP12	1.0408	1.08358	0.962189	1.04179	0.933333	0.985075	1.15224	0.928358	1.03284	1.00498	0.897512	1.04378	0.870647	1.00796	0.971144	1.11144
ILMN_1686846	AKAP12	0.947264	1.19403	0.962189	0.956219	0.934328	0.954229	2.21791	1.01891	0.929353	0.826866	0.740299	0.898507	0.859701	0.799005	0.845771	1.75522
ILMN_2308950	AKAP12	0.954229	1.01294	0.921393	1.0408	1.03682	0.953234	1.2796	0.860697	0.970149	0.936318	0.806965	1.00299	0.844776	0.932338	1.0398	1.31741
ILMN_1752247	AKAP13	5.2607	3.11642	3.0796	5.30149	3.38806	4.95423	3.84478	3.04776	4.31045	3.09552	3.22786	7.399	3.62985	3.46468	3.52139	3.1592
ILMN_2396956	AKAP13	17.1035	13.808	9.72935	16.2318	14.2289	20.4876	13.4975	12.0418	14.8209	14.2955	14.4985	29.9682	12.392	16.8169	13.2448	13.794
ILMN_1679987	AKAP14	0.857711	0.918408	0.850746	0.885572	0.871642	0.932338	1.12139	0.962189	0.80597	0.933333	0.787065	0.931343	0.729353	0.879602	0.839801	0.991045
ILMN_1673542	AKAP14	0.852736	0.886567	0.841791	0.845771	0.907463	0.814925	1.12736	0.859701	0.908458	0.81194	0.847761	0.876617	0.826866	0.841791	0.859701	1.12637
ILMN_1802537	AKAP14	0.917413	0.933333	0.912438	0.966169	0.939303	0.821891	1.16418	0.898507	0.98209	0.965174	0.791045	0.964179	0.80995	0.881592	0.885572	1.21692
ILMN_1737754	AKAP2	1.00896	0.874627	0.893532	0.847761	0.907463	0.981095	1.31144	0.824876	0.907463	0.861692	0.827861	0.864677	0.857711	0.936318	0.894527	1.08657
ILMN_1808905	AKAP3	1.93134	1.66468	1.70448	1.19204	1.84378	1.50547	2.4398	1.3403	1.50149	1.71542	1.06965	1.32736	1.5005	1.87463	1.25871	2.34726
ILMN_2268556	AKAP4	1.01791	0.947264	0.913433	0.962189	0.960199	0.923383	1.08159	0.910448	1.12438	0.904478	0.887562	1.0408	0.959204	1.03284	0.981095	1.0796
ILMN_2253207	AKAP4	1.05075	1.02488	1.10348	1.01393	1.01692	0.977114	1.16716	1.11045	0.978109	0.964179	0.939303	0.929353	0.98806	0.948259	1.01393	1.14527
ILMN_1734794	AKAP4	1.0607	1.10149	0.914428	1.10448	1.18209	1.12537	1.71542	1.03781	0.952239	0.946269	0.860697	1.01493	0.973134	1.04677	0.964179	1.63184
ILMN_1690818	AKAP5	1.02289	0.99602	0.939303	0.826866	0.883582	0.863682	1.33831	0.909453	0.882587	0.79801	0.918408	0.913433	0.847761	0.920398	0.787065	1.17114
ILMN_1770758	AKAP6	0.932338	0.950249	0.870647	0.874627	0.862687	0.864677	1.03881	0.908458	0.902488	0.8199	0.799005	0.733333	0.81592	0.808955	0.820896	0.99005
ILMN_2293529	AKAP7	0.889552	0.935323	0.888557	0.875622	0.955224	0.862687	0.928358	0.855721	0.98806	0.763184	0.714428	0.78209	0.791045	0.882587	0.79801	0.98607
ILMN_1703049	AKAP7	15.206	10.0279	4.58308	5.24378	17.8886	4.55323	7.33831	10.6507	17.5761	11.5721	8.17214	19.9134	9.00299	26.7831	12.4905	11.4826
ILMN_1733690	AKAP7	3.22289	2.6209	1.49055	4.02985	2.75224	2.9204	3.80697	3.3602	3.0995	2.2796	2.57413	5.54925	3.23184	3.40896	2.86866	3.66866
ILMN_2410406	AKAP7	0.937313	0.870647	0.920398	1.0199	0.852736	0.976119	1.3194	0.883582	1.01891	0.78806	0.848756	0.99204	0.888557	0.840796	0.885572	1.1791
ILMN_1741572	AKAP8	3.36816	3.16418	1.94428	3.40597	3.37612	3.08159	3.99204	3.75124	3.82488	2.3592	2.95025	5.21692	3.1592	2.99104	2.99602	3.96915
ILMN_1768962	AKAP8L	3.96517	5.3194	2.12438	2.84776	4.41393	2.74627	3.85373	5.32438	5.19403	2.86965	4.97413	4.63284	2.52139	3.95522	3.77015	3.99701
ILMN_2400663	AKAP9	1.0607	0.896517	0.859701	0.874627	0.937313	0.949254	1.38507	0.973134	0.966169	0.851741	0.728358	0.99801	0.78607	0.81194	0.956219	1.24577
ILMN_2396691	AKAP9	1.13433	1.12637	0.924378	1.09453	1.11841	1.07662	1.37015	1.01592	1.09453	1.00398	0.79602	1.12736	0.903483	1.03483	1.19005	1.37313
ILMN_1802799	AKIRIN1	8.91343	7.56517	5.40597	5.09254	6.36119	6.92935	5.9204	5.73333	9.40796	6.56816	6.57811	11.8139	6.02289	7.20597	5.50149	7.32438
ILMN_1679383	AKIRIN1	1.04378	1.00199	1.33035	1.17114	0.978109	1.65871	1.74826	1.17015	1.09055	1.18209	1.14428	1.42786	1.04677	0.887562	0.942289	1.76418
ILMN_1658337	AKIRIN1	3.96219	1.66368	4.39403	5.78308	2.27264	7.31144	2.29254	1.91542	2.65473	4.94826	2.55124	9.04975	4.10448	3.15323	3.04776	2.19502
ILMN_2148847	AKIRIN2	13.6876	10.3333	9.64478	12.4458	9.26269	14.0567	17.9542	11.0129	11.1871	13.7055	11.7015	31.4269	10.6746	15.7144	10.9801	15.3582
ILMN_1770673	AKNA	27.8358	27.4816	14.9104	20.5502	24.1254	24.3015	27.0517	18.8597	23.3403	18.6418	23.5323	37.6667	17.0866	22.5771	18.1383	24.3672
ILMN_1728047	AKR1A1	8.93831	8.55622	3.61194	8.72935	6.73134	7.601	9.13532	7.69254	9.80896	6.90149	6.65075	12.1363	6.45672	7.84776	6.29552	8.01493
ILMN_1774938	AKR1A1	0.99005	0.838806	0.917413	0.81791	0.892537	1.05572	1.27562	0.902488	0.829851	0.869652	0.772139	0.946269	0.791045	0.944279	0.883582	0.99801
ILMN_2380771	AKR1A1	8.55622	6.74627	3.62985	8.05672	5.8995	7.93333	8.66169	7.07164	8.60199	5.98607	5.86766	10.8169	6.66667	7.43881	5.93433	8.77711
ILMN_1701731	AKR1B1	9.68856	9.01791	4.08159	8.42587	9.13731	10.1055	7.2	8.4995	10.8876	6.67761	8.00896	12.2478	8.09851	7.86965	8.43682	7.19005
ILMN_1672148	AKR1B10	0.904478	0.842786	1.04677	0.808955	0.99403	0.908458	1.25174	0.737313	0.79801	0.862687	0.881592	0.830846	0.715423	0.895522	0.908458	1.06368
ILMN_1662507	AKR1C1	0.931343	0.972139	0.806965	0.842786	0.849751	0.858706	1.23881	0.760199	0.766169	0.733333	0.868657	0.891542	0.776119	0.81194	0.821891	1.1204
ILMN_2412336	AKR1C2	0.854726	0.928358	0.7801	0.785075	0.898507	0.895522	1.07463	0.930348	0.867662	0.810945	0.952239	0.743284	0.814925	0.887562	0.712438	1.07363
ILMN_1713124	AKR1C3	3.89154	3.42488	1.78408	2.99602	5.65771	3.82786	3.73831	4.63383	3.61791	2.82587	3.35323	4.31045	1.93035	2.12736	3.33035	4.11741
ILMN_1668880	AKR1C4	0.974129	1.07264	1.02587	0.991045	1.04279	0.979104	1.36915	1.02886	1.07363	1.08159	0.964179	1.08955	0.903483	1.04577	0.931343	1.48259
ILMN_1685803	AKR1CL1	0.955224	0.906468	0.956219	1.0199	0.874627	0.882587	1.30547	1.06368	0.890547	0.989055	0.81791	0.918408	0.922388	0.951244	0.873632	1.04876
ILMN_1694985	AKR1CL2	0.887562	0.880597	0.883582	0.855721	0.993035	0.781095	1.17313	0.81393	0.868657	0.778109	0.765174	0.812935	0.767164	0.783085	0.950249	1.14229
ILMN_2157277	AKR1D1	163.966	117.218	127.52	320.681	117.47	293.917	183.782	210.155	217.523	119.724	145.927	205.729	113.896	129.581	193.183	174.82
ILMN_1677043	AKR7A2	12.2517	9.52537	5.23383	9.21393	8.60597	8.9393	10.1881	9.71244	10.3254	8.96816	7.53731	12.5652	8.58706	8.85373	8.63582	11.0935
ILMN_2145396	AKR7A3	2.97612	2.63085	1.70846	2.48657	2.4806	2.50448	3.28458	2.599	3.10149	2.18507	2.28955	3.60398	2.22886	2.37711	2.55522	3.25572
ILMN_2388507	AKT1	27.4726	22.1502	19.408	28.0458	24.9144	26.8915	25.3144	25.3711	25.0607	24.8279	26.7741	43.604	18.8706	28.5453	20.5751	27.6945
ILMN_2410909	AKT1	28.4766	25.9463	16.009	23.9652	26.0269	26.8826	22.3891	24.0756	20.6348	23.4468	30.0537	46.804	18.809	30.6806	18.194	22.9294
ILMN_1748661	AKT1	1.201	1.02488	0.976119	1.10547	1.08358	1.11045	1.90448	1.02289	1.11144	1.00796	0.883582	0.943284	0.98806	1.02687	0.985075	2.03383
ILMN_1726906	AKT1S1	1.32935	1.20299	1.11642	0.878607	1.2209	1.1393	1.25771	1.1005	1.18408	1.15522	0.979104	0.98209	1.20995	1.15622	1.02985	1.47463
ILMN_1743347	AKT2	1.27065	1.00299	1.96716	1.97612	1.09851	2.06169	2.19204	1.13632	1.03483	1.08657	0.895522	1.02786	0.928358	0.949254	0.99602	1.22488
ILMN_1733598	AKT3	1.01592	1.03383	0.959204	0.926368	0.970149	0.912438	1.3403	1.01692	0.949254	1.03085	0.947264	1.28955	0.853731	1.001	1.02985	1.26368
ILMN_1757130	AKT3	1.0607	0.999005	0.948259	0.971144	0.981095	1.05274	2.04279	0.947264	0.964179	0.877612	0.740299	1.00199	0.864677	0.974129	0.959204	1.50348
ILMN_2325610	AKT3	1.06368	0.974129	0.932338	0.948259	0.939303	1.19602	1.33433	1.01891	0.967164	0.909453	0.924378	1.05771	0.959204	0.997015	0.973134	1.25075
ILMN_2377240	AKTIP	5.79005	4.39502	3.21493	4.40697	4.15224	4.82786	5.97413	6.29851	6.27662	3.74726	5.16219	9.75323	4.64478	5.65373	5.8597	5.86468
ILMN_1665982	AKTIP	1.89154	1.24876	1.00597	1.39104	1.22189	1.40199	1.75224	1.83881	1.72637	1.13035	1.28756	2.31144	1.36219	1.58905	1.61095	1.83483
ILMN_2404657	ALAD	1.07164	1.11343	0.99801	1.12338	1.13532	1.01095	1.92338	1.10448	0.932338	0.926368	0.804975	1.03085	0.820896	1	1.06368	1.78408
ILMN_1747577	ALAD	3.5592	2.40995	2.00498	3.6199	2.99204	3.58109	3.68657	2.56418	2.98109	3.03483	2.06269	4.4597	2.94428	2.75025	2.85771	3.18706
ILMN_1679898	ALAD	0.878607	0.812935	0.897512	0.799005	0.903483	0.98209	1.10846	0.926368	0.886567	0.769154	0.80995	0.81592	0.929353	0.759204	0.910448	0.918408
ILMN_1700047	ALAS1	1.21294	1.10249	1.02886	1.02786	1.03085	1.10647	1.33831	1.0597	1.10945	0.985075	0.999005	1.3204	0.925373	1.10149	0.972139	1.21592
ILMN_2385647	ALAS1	1.11841	1.04378	1.13333	1.17114	1.1602	1.09453	1.55721	1.03881	1.31741	1.10348	2.30547	1.32935	1.01692	1.21692	1.16915	1.76915
ILMN_1728309	ALAS1	1.00796	0.972139	0.963184	1.02587	0.972139	0.946269	1.81692	0.983085	0.931343	0.879602	0.853731	0.848756	0.957214	0.976119	0.906468	1.47065
ILMN_1708323	ALAS2	7.79801	16.8498	33.4269	7.05373	9.73831	10.2557	17.599	10.4836	20.5493	33.7095	8.8199	9.46866	7.45871	17.7433	10.0557	22.6806
ILMN_2367126	ALAS2	239.254	404.164	702.081	316.845	310.206	432.101	581.05	295.825	572.422	667.651	336.212	362.394	275.92	493.502	375.911	592.893
ILMN_2271875	ALAS2	1.38806	1.12637	3.1204	1.99403	1.35821	2.54726	2.05274	1.25274	1.56219	2.87861	1.07363	1.96716	1.85672	1.54726	1.45871	1.8607
ILMN_1782939	ALB	0.913433	0.823881	0.821891	0.857711	0.859701	0.952239	0.938308	0.928358	0.904478	0.795025	0.753234	0.915423	0.778109	0.850746	0.888557	0.897512
ILMN_1670870	ALCAM	2.68955	1.8796	1.48259	1.7393	1.78308	1.71343	3.11144	2.04378	2.26269	1.47164	2.02786	3.00796	1.55423	2.01095	1.67264	2.77711
ILMN_2051381	ALDH16A1	2.47761	2.8398	1.35323	2.15025	2.27164	1.9791	2.38308	2.63881	3.22587	1.85572	2.59204	3.35522	1.72537	2.16617	2.47065	2.14726
ILMN_2302716	ALDH18A1	1.98607	1.82985	1.21891	1.70746	1.52935	1.6199	2.07562	1.88657	2.00498	1.16318	1.53035	1.73532	1.42587	1.7403	1.67463	1.93433
ILMN_2096372	ALDH1A1	2.35522	1.89055	1.30448	2.50547	1.86368	2.15721	2.83483	1.92438	2.42488	1.56816	2.15323	4.83781	2.09751	2.22786	1.69254	2.67363
ILMN_1748538	ALDH1A2	1.0995	0.944279	0.995025	0.98806	0.963184	0.961194	1.46965	1.04378	0.949254	1.08557	0.936318	1.06766	0.98607	0.924378	0.946269	1.33134
ILMN_2383707	ALDH1A2	1.13333	1.02587	1.001	1.04179	1.05771	1.07761	1.39104	1.08657	1.1194	1.05473	0.888557	1.06169	0.865672	0.99801	1.04478	1.43383
ILMN_2139970	ALDH1A3	0.852736	0.825871	0.821891	0.899502	0.860697	0.799005	1.43881	0.940299	0.78806	0.833831	0.773134	0.78806	0.773134	0.818905	0.822886	1.63383
ILMN_2150894	ALDH1B1	1.18607	1.07861	0.921393	1.06866	1.10846	1.16219	1.25771	1.08557	1.01493	0.939303	0.951244	1.16418	1.07065	1.12637	1.12537	1.25572
ILMN_1802167	ALDH1L1	0.883582	0.81791	0.835821	0.729353	0.828856	0.907463	1.29851	0.688557	0.78408	0.78408	0.79204	0.851741	0.888557	0.800995	0.783085	1.24179
ILMN_2182980	ALDH1L2	0.99005	1.05373	0.925373	0.991045	1.13433	0.902488	2.22189	0.885572	0.884577	0.836816	0.945274	0.891542	0.842786	0.851741	0.860697	2.0597
ILMN_1793859	ALDH2	6.84478	6.96219	4.5204	8.25174	4.31642	7.70149	7.61493	5.50448	7.07065	6.19303	7.49851	14.5682	6.50846	5.78308	5.48856	6.88856
ILMN_1702503	ALDH3A1	0.962189	0.891542	0.938308	0.840796	0.99204	0.871642	1.13433	0.866667	0.923383	0.808955	0.754229	0.924378	0.741294	0.965174	0.842786	1.0398
ILMN_1667564	ALDH3A2	1.07662	0.930348	0.835821	1.04179	0.849751	1.08458	1.33831	0.880597	1.11443	0.892537	0.935323	1.19204	0.879602	0.934328	0.954229	1.15522
ILMN_2401641	ALDH3A2	1.88756	1.54129	1.27164	2.10647	1.38905	2.07363	2.01393	1.79303	1.72139	1.47363	1.56617	2.61393	1.92139	1.58806	1.77015	1.95124
ILMN_1727965	ALDH3B1	0.99801	0.774129	0.968159	0.922388	0.848756	0.99801	1.38507	0.891542	0.879602	0.879602	0.749254	0.99005	0.7801	0.851741	0.874627	1.18706
ILMN_1728662	ALDH3B1	4.61393	4.12836	3.56318	5.46269	4.91741	6.02587	6.32836	4.48657	4.50647	4.88657	5.36915	6.41294	3.43085	4.79502	3.56219	6.18408
ILMN_2363880	ALDH3B2	0.948259	1.02886	0.906468	0.964179	0.991045	0.898507	1.86269	0.947264	0.871642	0.874627	0.767164	0.880597	0.958209	0.902488	1.01194	1.50547
ILMN_1761514	ALDH3B2	0.971144	0.902488	0.825871	0.904478	1.07463	0.878607	1.51144	0.971144	0.940299	0.824876	0.785075	0.966169	0.861692	0.875622	0.843781	1.16517
ILMN_1763666	ALDH3B2	0.963184	0.925373	0.912438	0.98408	0.897512	0.916418	1.2209	0.908458	0.868657	0.884577	0.7801	0.884577	0.923383	0.80796	0.98209	1.07264
ILMN_2244841	ALDH4A1	0.853731	0.833831	0.860697	0.799005	0.851741	0.80796	0.969154	0.832836	0.816915	0.718408	0.870647	0.851741	0.812935	0.752239	0.781095	0.862687
ILMN_1656368	ALDH4A1	1.13333	1.08856	0.876617	1.15622	1.11343	1.08458	1.55721	1.16418	1.19502	0.959204	1.00995	1.10149	0.98209	0.989055	1.08358	1.52935
ILMN_2406557	ALDH4A1	1.17512	1.1791	1.12935	1.06169	1.35323	1.16418	1.44577	1.07761	1.16318	1.10746	0.937313	1.29055	1.04478	1.04677	1.09254	1.4
ILMN_2372398	ALDH5A1	2.59602	1.80199	2.49254	3.38209	1.57711	3.5194	2.99801	2.86468	4.22189	2.05075	1.84876	6.001	1.98209	2.71244	2.32736	2.89353
ILMN_2096985	ALDH6A1	1.17811	1.23284	0.904478	1.17811	1.30448	1.07264	1.34129	1.2	1.19204	1.0209	0.876617	1.08756	1.10149	1.1801	1.09453	1.14328
ILMN_1687508	ALDH7A1	1.14527	1.13831	0.997015	1.07264	1.07761	1.12836	1.55522	0.985075	1.06269	0.935323	1.001	1.03582	0.944279	1.07264	1.01692	1.36816
ILMN_2365176	ALDH8A1	1.16915	1.17612	0.920398	1.23682	1.12438	1.1592	1.50945	1.21791	1.38209	1.11443	1.22388	1.41194	0.967164	1.23781	1.25871	1.39701
ILMN_1681938	ALDH8A1	0.861692	0.923383	0.893532	0.81592	0.98607	0.821891	1.06667	0.830846	0.80398	0.853731	0.777114	0.80597	0.79204	0.897512	0.872637	1.09851
ILMN_1761804	ALDH9A1	30.7214	18.9711	14.3751	22.7572	19.8716	33.9303	24.791	23.7771	24.9811	19.1592	18.8	41.4896	24.5771	29.8249	22.1274	26.6269
ILMN_1681374	ALDOA	1.11741	1.05672	1.08856	1.10547	1.19104	1.04577	1.99801	1.11343	0.973134	1.08159	0.977114	1.02388	0.940299	0.969154	1.11443	1.55622
ILMN_1736700	ALDOA	33.8876	16.7403	34.5841	43.5353	22.6279	68.3323	12.5433	11.5144	16.6338	39.9682	22.2687	60.5701	27.7891	17.7154	24.799	10.2716
ILMN_2251253	ALDOA	1.13731	1.04577	0.951244	1.03582	1.07264	1.10249	1.39303	1.02189	1.04279	1.13532	0.887562	0.983085	0.959204	0.916418	1.1602	1.36517
ILMN_1741148	ALDOA	50.0458	49.1413	26.5453	34.8169	41.3473	42.4249	42.5741	36.8189	37.8209	39.5622	42.3771	60.7095	29.8975	40.1512	34.7343	39.9602
ILMN_1747716	ALDOB	2.04677	1.69652	1.70746	2.3403	1.81493	2.09055	1.79602	1.66567	2.19303	1.7403	1.8607	2.199	1.12836	1.50249	2.34627	1.63582
ILMN_1755974	ALDOC	9.39801	6.87164	4.70746	5.36517	6.41194	5.80995	8.23881	5.73532	6.59701	5.13831	4.72537	8.25274	5.24577	6.13731	6.01592	6.78607
ILMN_1718093	ALG1	1.34129	1.05672	1.14925	1.24776	1.20995	1.23682	1.42289	1.08259	1.12239	1.07164	1.09353	1.38109	1.09055	1.17413	1.26667	1.16418
ILMN_1730304	ALG10B	0.977114	0.820896	0.913433	0.972139	1.01095	0.991045	1.29851	0.966169	1.04677	0.902488	0.80398	0.98607	0.936318	0.944279	0.949254	1.14229
ILMN_1666325	ALG10B	1.04179	0.958209	0.931343	0.983085	0.98408	1.01493	1.58308	0.918408	0.968159	0.854726	0.968159	1.14925	0.816915	0.946269	0.849751	1.21393
ILMN_2120982	ALG11	0.851741	1.599	0.889552	0.975124	1.38806	1.1801	1.09453	1.61692	0.906468	0.915423	1.27761	0.946269	1.31144	1.49254	0.909453	1.40597
ILMN_1743995	ALG12	1.2806	1.19403	1.07264	1.35821	1.14925	1.16418	1.72736	1.22985	1.17612	1.15622	0.840796	1.14229	1.07164	1.20697	1.08458	1.66567
ILMN_2147503	ALG13	1.04776	1.00199	0.861692	0.978109	1.16617	0.912438	1.18706	0.935323	1.02388	0.99403	0.783085	1.00896	0.882587	1.1194	0.999005	1.001
ILMN_2191822	ALG14	1.01294	0.916418	0.900498	1.03085	0.910448	0.993035	1.01095	0.981095	1.03483	0.896517	0.889552	1.14925	0.898507	0.894527	0.978109	1.07065
ILMN_1737945	ALG2	1.14527	1.04577	1.02388	0.926368	0.985075	0.953234	1.39801	1.03781	0.962189	0.900498	0.841791	1.02786	0.869652	1.03483	0.967164	1.21095
ILMN_1711886	ALG3	3.75323	3.18308	2.16219	4.12736	3.39701	4.01393	3.73234	3.65771	4.34826	2.9801	2.66567	4.93731	3.60597	3.64776	3.56219	4.15323
ILMN_1664449	ALG5	3.13134	2.6796	1.68458	3.24378	2.86866	2.68856	4.01095	3.0806	4.16716	2.55323	2.17313	3.54229	2.98209	2.91045	2.66269	4.34527
ILMN_1771411	ALG6	2.48657	2.2597	1.38905	2.51642	1.92239	2.799	3.86965	2.50945	2.69552	1.7403	2.27363	4.11045	2.14129	2.26866	2.5393	3.52338
ILMN_2365686	ALG8	2.14527	1.63881	1.24677	2.11343	1.65572	1.7403	2.32338	1.92935	2.48756	1.62687	1.54428	3.13632	1.85274	1.72935	1.80896	2.35721
ILMN_2271014	ALG8	1.08856	0.884577	0.904478	0.951244	0.960199	0.907463	1.13632	0.895522	1.06866	0.832836	0.966169	0.99204	0.842786	0.954229	0.974129	1.03682
ILMN_1685413	ALG8	3.4607	2.68856	1.64478	3.35025	2.82189	2.96617	3.8796	3.35323	4.05771	2.69652	2.03881	4.59403	3.14229	3.12338	2.9194	3.81095
ILMN_1732809	ALG9	2.08458	1.64478	1.1592	1.95124	1.52537	1.87065	3.26567	1.83881	2.01891	1.30945	1.49751	2.06667	1.55423	1.61393	1.60697	2.2
ILMN_1753135	ALK	1.11841	0.991045	1.04677	0.922388	0.946269	0.932338	1.42488	1.07662	1.05473	0.99403	0.942289	1.04179	1.02488	1.03085	0.932338	1.53333
ILMN_2276750	ALKBH1	1.02786	0.997015	1.02189	1.0607	1.15423	1.19104	1.22687	1.05473	1.05871	1.01791	0.911443	1.10348	0.921393	1	0.858706	1.53731
ILMN_1758038	ALKBH1	1.85373	1.36517	1.22587	2.1204	1.57512	1.98905	1.93532	1.66468	1.95323	1.50647	1.40796	2.64776	1.79701	1.78209	1.77612	1.80398
ILMN_2375973	ALKBH1	1.80199	1.52736	1.37114	2.19403	1.5403	2.27562	1.95622	1.84577	1.83483	1.49254	1.38507	2.79204	1.73632	1.73035	1.60398	1.83085
ILMN_1690252	ALKBH2	1.93035	1.95323	1.39204	2.06866	1.89055	1.67562	1.97612	2.21891	2.02388	1.45075	1.53134	2.09851	1.68756	1.86766	1.78905	2.02687
ILMN_2134062	ALKBH3	3.12736	2.80398	1.55622	2.99104	2.67861	2.45075	2.9393	2.98408	3.73632	2.10149	2.59403	3.83284	2.8	2.99502	2.71045	2.97114
ILMN_1805673	ALKBH4	1.45473	1.35721	1.05572	1.31144	1.48756	1.2796	1.62587	1.32239	1.3194	1.2597	0.993035	1.37512	1.14726	1.2199	1.36716	1.67562
ILMN_1657283	ALKBH5	58.1861	43.0985	27.6846	49.9055	41.9065	64.4398	43.3662	45.609	55.9095	40.5751	35.0577	75.1403	47.3393	50.0249	49.6537	39.5791
ILMN_1808792	ALKBH6	2.6796	2.11741	1.47363	2.62189	2.20597	2.44279	2.59403	2.52637	2.86468	1.7194	2.31841	3.01194	2.22587	1.97413	1.97214	2.55323
ILMN_1761764	ALKBH7	3.31542	2.51443	1.8	2.35622	2.79502	2.19701	2.95423	2.91045	2.60995	2.16418	2.05572	2.21493	2.50348	2.39204	2.25075	2.43582
ILMN_1779190	ALKBH8	1.5791	1.31841	0.950249	1.47363	1.31443	1.55622	1.63582	1.57413	1.51443	1.11343	1.17612	1.49751	1.40199	1.27065	1.49353	1.66269
ILMN_1796946	ALLC	0.949254	0.949254	0.896517	0.800995	0.916418	0.934328	0.993035	0.964179	1.01791	0.936318	0.861692	0.857711	0.742289	1.01393	0.944279	1.06667
ILMN_1784583	ALLC	0.912438	0.838806	0.826866	0.965174	0.903483	0.897512	1.12239	0.916418	0.80398	0.833831	0.895522	0.81592	0.905473	0.958209	0.883582	1.16318
ILMN_1681046	ALLC	1.06169	0.950249	1.08856	1.09652	1.05274	0.926368	1.33532	1.0199	1.01194	1.00796	0.877612	0.908458	0.98408	0.98806	0.875622	1.47662
ILMN_1709474	ALMS1	1.54527	1.63184	1.16617	1.59801	1.61891	1.65373	1.45572	1.66866	1.68259	1.62886	1.29652	1.87463	1.61095	1.42488	1.44378	1.61393
ILMN_1713731	ALOX12	2.99801	3.34328	2.78905	1.83582	2.37711	3.18706	3.84179	4.05075	3.51841	3.24478	1.98507	3.82587	2.00498	2.67761	2.76915	3.59801
ILMN_1692332	ALOX12B	1.03483	0.831841	0.873632	1.14925	1.06866	0.854726	1.5005	0.945274	0.907463	0.953234	0.858706	0.914428	0.842786	0.904478	0.800995	1.10149
ILMN_2137544	ALOX12P2	0.825871	0.759204	0.831841	0.878607	0.839801	0.816915	1.08756	0.79005	0.728358	0.877612	0.828856	0.78806	0.839801	0.810945	0.7801	1.17015
ILMN_1783443	ALOX15	1.30746	0.958209	1.27662	1.15622	1.30149	1.22488	1.67463	1.56418	1.28756	1.37114	0.854726	1.47761	1.18607	1.15721	1.02687	1.85373
ILMN_2403534	ALOX15	1.11244	0.9801	0.968159	0.954229	1.07363	0.997015	2.31244	1.20398	1.0806	1.02786	0.919403	0.974129	0.954229	1.10945	1.06269	1.87861
ILMN_2276904	ALOX15B	0.952239	0.835821	0.906468	0.852736	0.854726	0.871642	1.29851	0.869652	0.828856	0.841791	0.937313	1.00796	0.894527	0.802985	0.99801	1.2597
ILMN_1751975	ALOX15B	0.987065	0.983085	0.874627	0.913433	0.957214	1.02886	1.27463	0.950249	1.00597	0.928358	0.853731	0.895522	0.912438	0.942289	0.893532	1.13234
ILMN_2393149	ALOX15B	1.29055	1.0806	1.03085	1.11244	1.10846	1.0796	1.71443	1.01493	0.953234	0.889552	0.962189	0.99204	1.00498	1.14129	1.05174	1.78806
ILMN_1680996	ALOX5	108.985	76.5851	103.599	113.942	83.8318	135.407	91.591	69.1154	74.1323	117.303	105.5	244.199	68.8915	106.3	85.3721	89.5433
ILMN_1792150	ALOX5	0.989055	1.02289	1.01095	1.16915	1.03085	1.04776	1.60995	1.14428	0.875622	1.05174	0.917413	0.946269	0.900498	0.923383	0.975124	1.3403
ILMN_1797875	ALOX5AP	185.067	133.386	151.407	99.9801	114.115	98.609	174.645	120.519	123.272	148.498	139.07	269.318	128.905	209.789	125.673	170.766
ILMN_1678255	ALOXE3	1.03284	0.793035	1.04478	1.04378	1.11045	1.10746	1.25572	1.10348	1.08259	1.00697	0.80796	0.933333	0.881592	1.06667	0.935323	1.15224
ILMN_1752669	ALPI	1.1791	1.09552	1.10448	1.20299	1.07065	1.14925	1.57015	1.28856	1.13333	1.05672	1.0408	1.08756	1.06468	1.0995	0.963184	1.28856
ILMN_2078697	ALPK1	7.30249	5.01791	4.51642	5.87761	5.04478	5.9801	6.98905	4.47463	5.98507	5.2806	8.2995	12.1274	4.0199	6.20796	6.27264	7.16915
ILMN_1811238	ALPK2	1.07861	0.951244	1.01592	0.892537	0.918408	0.970149	1.74229	0.939303	0.919403	0.825871	0.991045	1.02189	0.78607	0.882587	0.991045	1.60896
ILMN_1734630	ALPK3	1.06468	0.877612	0.925373	0.946269	0.944279	0.880597	1.45075	0.810945	0.950249	0.901493	0.863682	0.872637	0.80796	0.785075	0.844776	1.26866
ILMN_1701603	ALPL	107.584	90.001	56.8279	51.209	32.6856	79.9512	69.1363	33.7095	45.5502	148.645	152.93	130.745	38.4299	98.1204	76.9761	105.746
ILMN_1693789	ALPP	27.8677	22.0856	20.2806	61.9303	22.1552	53.8876	39.8776	56.6159	72.9463	15.4458	33.5532	55.4109	19.9572	26.1025	48.5493	41.0249
ILMN_1801851	ALPPL2	1.4398	1.30348	1.40697	1.32537	1.39502	1.20498	1.71144	1.22886	1.399	1.17413	0.960199	1.17114	1.17612	1.18905	1.10547	1.7791
ILMN_1750256	ALS2	2.71045	1.92637	1.71741	2.55323	2.3791	2.57214	2.77612	3.001	2.70846	1.63881	2.30746	4.16517	2.19204	2.00697	2.22587	3.2209
ILMN_1700596	ALS2CL	1.14627	0.978109	1.04577	0.909453	1.12338	0.981095	1.44876	1.0398	0.970149	0.916418	0.904478	0.99801	1.01294	0.922388	1.04776	1.48756
ILMN_1702322	ALS2CL	0.983085	0.968159	0.863682	0.910448	0.901493	0.938308	1.18507	0.932338	0.905473	0.892537	0.924378	0.953234	0.919403	0.857711	0.866667	1.17711
ILMN_1690636	ALS2CL	0.891542	0.899502	0.999005	0.869652	0.967164	0.918408	1.22886	0.778109	0.874627	0.928358	0.888557	0.904478	0.79801	0.99403	0.856716	1.08856
ILMN_1792449	ALS2CR11	0.906468	0.913433	0.997015	0.957214	0.941294	0.891542	1.07065	0.926368	0.876617	0.944279	0.845771	0.909453	0.818905	0.864677	0.983085	1.00995
ILMN_1765674	ALS2CR12	1.01791	0.870647	0.851741	0.965174	0.9801	0.916418	1.73234	0.901493	0.920398	0.78408	0.769154	0.958209	0.847761	0.827861	0.906468	1.76915
ILMN_1739942	ALS2CR13	10.1194	6.8607	4.43881	10.3353	8.71045	11.6328	14.0378	9.46368	10.8328	6.95124	6.71542	18.1632	9.0408	9.64776	7.55025	14.21
ILMN_1663897	ALS2CR16	1.02388	0.922388	0.912438	1.09751	0.962189	1.02488	1.35025	1.0398	0.977114	0.947264	1.06965	1.18209	0.935323	0.912438	1.12637	1.14328
ILMN_1800958	ALS2CR4	0.970149	0.920398	0.804975	1.09751	1.04975	1.21493	1.51443	0.956219	1.05771	0.969154	0.959204	1.31741	0.964179	0.969154	0.99204	1.03781
ILMN_1760889	ALS2CR8	0.99801	0.893532	0.948259	1.08657	1.06368	1.1393	1.27065	1.02189	1.11045	0.854726	0.799005	1.0597	0.972139	0.958209	0.872637	1.30149
ILMN_2191902	ALX3	0.927363	0.909453	0.940299	0.857711	0.886567	0.970149	1.11642	0.834826	0.929353	0.877612	0.78408	0.956219	0.755224	0.910448	0.852736	1.21294
ILMN_1803384	ALX4	0.888557	0.899502	0.870647	0.841791	0.896517	0.834826	1.40398	0.953234	0.909453	0.842786	0.785075	0.883582	0.900498	0.880597	0.947264	1.30945
ILMN_1797432	AMAC1	0.997015	1.01592	1.04478	1.03582	1.05473	0.983085	1.98308	0.912438	1.00398	0.948259	1.05572	1.00199	0.79602	1.0597	0.916418	1.90945
ILMN_2194619	AMAC1L2	1.11144	1.00597	0.958209	1.02985	1.05274	0.99204	1.12935	1.14328	1.06766	0.969154	0.917413	0.970149	1.04975	0.928358	1.06667	1.06866
ILMN_1759670	AMACR	1.22189	1.31343	1.2796	1.36816	1.2209	1.38408	1.52736	1.15821	1.25174	1.28657	1.04975	2.08657	1.38607	1.37512	1.19801	1.31841
ILMN_2367172	AMACR	1.35522	1.12637	1.12239	1.17313	1.22687	1.31144	1.2597	1.10448	1.04876	1.11542	1.03881	1.66269	1.11045	1.44776	1.14527	1.23582
ILMN_1794384	AMBN	0.99403	0.932338	0.957214	0.941294	0.902488	0.879602	1.57512	0.896517	0.856716	0.949254	0.857711	0.911443	0.79005	0.828856	0.795025	1.32438
ILMN_1751092	AMBN	0.912438	0.845771	0.919403	0.899502	0.909453	0.936318	1.1592	0.845771	0.924378	0.901493	0.824876	0.941294	0.79801	0.872637	0.960199	1.05274
ILMN_1695446	AMBP	1.18507	1.15622	1.2199	1.25672	1.25871	1.18806	1.4398	1.201	1.27861	1.13831	1.00398	1.2408	1.09055	1.25075	1.2796	1.51144
ILMN_1662681	AMBRA1	1.10249	1.06567	1.03483	0.98408	1.08557	0.99005	1.82289	1.00995	1.17413	1.05871	1	0.934328	0.972139	1.14826	1.01095	1.53234
ILMN_1788462	AMD1	20.2209	15.609	13.0517	16.1851	15.01	21.5493	17.2587	18.6418	18.3781	15.4368	17.4119	47.8458	16.1343	25.5682	18.392	17.601
ILMN_1667994	AMD1	4.95821	2.56716	3.60498	5.79005	2.62886	9.53134	1.99602	2.58806	3.13831	4.35423	2.95124	10.7861	3.34826	3.95721	2.87562	2.0408
ILMN_1788239	AMDHD1	1.19303	1.14925	1.09751	1.1592	1.19204	1.42886	1.40398	1.16318	1.3005	1.01493	1.06866	1.26567	1.07761	1.04975	1.10249	1.57313
ILMN_1695759	AMDHD2	2.13433	2.21393	1.40299	2.1592	2.46965	1.64776	2.38706	2.4806	2.801	1.64378	2.31741	2.401	1.66567	2.1602	1.94428	2.14229
ILMN_2397406	AMELX	0.919403	0.931343	0.950249	0.911443	0.993035	0.938308	1.02488	0.907463	1.00199	0.850746	0.862687	0.942289	0.920398	0.894527	0.918408	0.967164
ILMN_1727258	AMELY	0.979104	0.907463	0.98607	1.01791	1.11343	1.04776	1.25473	1.01493	1.01393	1.01194	0.871642	0.912438	1.01393	1.05274	1.02388	1.22886
ILMN_1723116	AMFR	7.63483	5.60796	5.07463	3.71343	6.17015	5.22289	6.47761	8.58806	5.79801	6.13035	4.1801	10.6259	3.78905	7.68856	9.28259	6.48756
ILMN_1666258	AMFR	1.59204	1.12338	1.41393	1.70149	1.24677	1.59104	1.57015	1.33134	1.599	1.55025	1.12438	1.99602	1.39204	1.43781	1.47164	1.50647
ILMN_1660995	AMH	0.9801	0.913433	0.869652	0.917413	0.916418	0.874627	1.30746	0.916418	0.866667	0.974129	0.831841	0.883582	0.78607	0.913433	0.917413	1.13134
ILMN_1736412	AMHR2	0.935323	0.932338	0.828856	0.850746	0.903483	0.875622	1.22189	0.900498	0.830846	0.820896	0.832836	0.903483	0.879602	0.878607	0.876617	1.17811
ILMN_1778723	AMICA1	81.998	84.1811	47.6766	60.1851	71.609	72.8716	68.9831	70.7313	91.4328	69.7811	88.2	128.147	56.8	92.999	71.9184	76.201
ILMN_1765460	AMIGO1	1.12836	1.19403	0.972139	1.06468	1.17512	1.04876	1.83284	1.17413	1.12338	1.00697	0.881592	1.16617	0.956219	1.05274	0.985075	1.70348
ILMN_1725896	AMIGO2	1.30249	1.26269	1.32836	1.18806	1.35025	1.34328	2.13831	1.45373	1.32935	1.12637	0.981095	1.31045	1.04179	1.16318	1.28159	1.68657
ILMN_1738233	AMIGO3	1.13831	0.99801	0.904478	1.05871	0.974129	1.03184	1.32637	0.99204	0.981095	1.01294	0.967164	1.10647	0.937313	1.02886	0.854726	1.14328
ILMN_1670506	AMMECR1	1.11343	0.970149	0.981095	1.00896	1.03483	1.06965	1.16119	1.1602	1.10647	0.949254	0.842786	0.860697	0.904478	0.940299	0.887562	1.22189
ILMN_1779374	AMMECR1	1.53134	1.399	1.05373	1.66368	1.2995	1.65373	2.14229	1.4	1.6995	1.06866	1.12836	1.84677	1.27463	1.32637	1.27264	1.97015
ILMN_2394242	AMMECR1	1.03781	0.9801	0.955224	1.29552	1.1005	1.12438	1.63184	0.971144	1.22985	1.04179	0.967164	1.50448	1.04975	1.25075	1.19303	1.21393
ILMN_1727023	AMMECR1L	2.14925	1.56119	1.32239	1.91045	1.5194	2.09055	1.86468	1.97413	1.95224	1.38905	1.49851	2.6209	1.45075	1.50547	1.55622	1.87463
ILMN_1683901	AMN	1.03781	0.974129	1.10448	1.04478	1.15224	0.970149	1.10945	1.06965	1.05871	0.99403	0.947264	1.0607	0.9801	0.903483	0.98209	1.06468
ILMN_1750880	AMN1	1.17214	0.978109	1.11244	1.0607	0.983085	1.01294	1.50348	1.19005	1.13831	1.04179	0.942289	1.46667	1.03781	0.970149	1.11542	1.3403
ILMN_1792409	AMOT	1.31045	1.18507	1.13333	1.36517	1.18706	1.14328	1.58905	1.20995	1.25174	1.0806	0.957214	1.47562	1.06368	1.16318	1.12537	1.60697
ILMN_1778788	AMOTL2	1.13731	1.01692	0.932338	1.03483	0.98209	0.964179	2.29154	1.12438	1.11144	0.887562	0.806965	0.953234	0.966169	1.00796	0.824876	2.24279
ILMN_1759312	AMPD1	0.969154	0.867662	0.829851	0.853731	0.845771	0.857711	1.2398	0.935323	0.779104	0.822886	0.845771	0.826866	0.783085	0.858706	0.892537	1.12736
ILMN_1701589	AMPD2	1.04577	0.907463	0.99801	0.885572	0.99801	1.06468	1.4199	0.873632	1.00995	0.921393	0.758209	0.930348	0.932338	1.04776	0.856716	1.20498
ILMN_1696830	AMPD2	0.867662	0.804975	0.879602	0.875622	0.862687	0.960199	1.69353	0.80199	0.922388	0.830846	0.831841	0.847761	0.80398	0.709453	0.972139	1.44577
ILMN_1786899	AMPD2	1.03582	0.832836	0.904478	0.81791	0.858706	0.840796	1.6398	0.856716	0.904478	0.842786	0.748259	0.928358	0.841791	0.862687	0.948259	1.43085
ILMN_1774447	AMPD3	1.34925	1.199	1.13731	1.36219	1.10249	1.25572	1.87463	1.33035	1.44677	1.22985	1.29453	1.71542	1.1194	1.26866	1.14328	1.45771
ILMN_1660854	AMPD3	1.00398	1.26468	0.928358	0.903483	0.944279	0.997015	1.36318	0.958209	1.10348	0.924378	0.903483	0.909453	1.01294	0.976119	0.99602	1.38209
ILMN_1665307	AMPD3	0.99403	0.897512	0.927363	0.957214	1.06169	1.01095	1.15224	0.9801	0.806965	0.873632	0.852736	0.894527	0.890547	0.971144	0.821891	1.24975
ILMN_1731223	AMPD3	1.15323	0.995025	0.958209	0.985075	1.23184	1.01294	1.37612	0.866667	1.02886	1.02886	0.956219	1.05771	0.896517	0.98408	0.941294	1.15622
ILMN_1685834	AMPH	1.09652	1.01194	1.01294	1.001	1.12637	1.08557	1.71244	1.10647	1.11045	1.04577	0.865672	1	0.981095	1.15124	0.908458	1.37612
ILMN_1725297	AMPH	1.11841	0.951244	1.04677	1.03184	0.99204	0.978109	1.59801	1.0199	1.0607	1.17114	0.937313	1.00896	0.785075	1.04378	0.965174	1.23284
ILMN_1665331	AMT	1.98706	1.54925	1.31741	2.81791	1.48557	2.46766	2.27363	2.57214	2.59701	1.35025	1.80697	2.68557	1.68358	1.43284	2.01194	2.40597
ILMN_1713927	AMTN	0.928358	0.855721	0.855721	0.787065	0.81393	0.862687	1.16915	0.833831	0.915423	0.897512	0.743284	0.824876	0.869652	0.862687	0.851741	1.20398
ILMN_1797796	AMY1A	0.816915	0.907463	1.00597	0.828856	0.865672	0.882587	1.12836	0.952239	0.840796	0.862687	0.878607	0.908458	0.862687	0.981095	0.902488	1.1791
ILMN_2294762	AMY1A	3.97015	3.21692	2.13433	2.86766	3.08159	14.79	4.58109	4.54328	3.23085	3.76716	3.45373	6.04677	3.92537	3.76418	3.57811	4.82488
ILMN_2408219	AMY1A	0.925373	0.892537	0.915423	0.81393	0.880597	0.927363	1.07861	0.894527	0.885572	0.955224	0.838806	0.783085	0.878607	0.828856	0.830846	1.12935
ILMN_2094262	AMY1B	0.968159	0.79602	0.866667	0.953234	0.924378	0.98607	1.19303	0.959204	0.954229	0.80796	0.879602	1.02289	0.79005	0.924378	0.906468	1.06866
ILMN_2131123	AMY2A	0.941294	1.04279	0.937313	0.993035	0.951244	0.929353	1.19204	0.98408	0.944279	0.907463	0.814925	1.08955	0.883582	0.897512	0.906468	1.08856
ILMN_2073157	AMY2B	1.43582	1.19104	1.19502	1.5791	1.12438	1.46468	1.52637	1.55224	1.71841	1.10647	1.3403	1.68856	1.21194	1.39701	1.25274	1.66269
ILMN_1785742	AMZ1	1.05572	1.17015	1.0209	1.04776	1.03582	0.966169	1.3194	0.977114	0.991045	1.05672	0.889552	0.931343	0.843781	0.969154	1.02587	1.12836
ILMN_2309549	AMZ2	1.14726	0.99403	1.10647	1.03582	1.07662	1.06766	1.27463	0.995025	1.23383	0.961194	0.937313	1.22189	0.966169	1.07861	0.940299	1.16219
ILMN_1801606	AMZ2	12.7045	8.4597	5.09552	8.92338	8.34826	9.33731	9.31045	10.2527	10.6796	7.05771	9.41592	20.6398	7.43682	9.47463	8.67164	8.05473
ILMN_1804812	ANAPC1	4.20796	3.1194	1.51642	3.76318	2.84876	3.79602	3.05672	3.81194	4.03483	2.6607	4.54229	4.86368	3.14129	3.07562	2.84179	3.17512
ILMN_1770378	ANAPC10	1.66866	1.22289	1.13234	1.8597	1.39303	1.66368	2.42189	1.40697	1.49254	1.31443	1.27264	2.29353	1.68458	1.38308	1.38706	2.16617
ILMN_2343563	ANAPC11	2.87662	2.74726	1.84378	2.51045	2.69552	2.37711	3.37612	2.48756	3.19403	2.41891	2.17811	2.94229	2.6	2.80199	2.47861	3.2199
ILMN_1726281	ANAPC11	0.828856	0.862687	0.886567	0.918408	0.962189	0.846766	1.59502	0.961194	0.855721	0.880597	0.754229	0.917413	0.800995	0.896517	0.818905	1.56517
ILMN_1753773	ANAPC11	1.14229	1.01791	1.00697	1.13333	1.09453	1.11045	1.42687	1.10846	0.987065	0.942289	0.916418	1.03184	0.949254	1.04776	1.03483	1.4806
ILMN_1722102	ANAPC11	4.85274	3.89751	3.09851	4.3393	4.22886	3.16418	5.53035	4.35622	4.52935	3.60796	2.66866	3.41393	3.49751	3.76816	3.43284	4.91144
ILMN_1793894	ANAPC13	17.5791	12.0667	10.9602	17.2368	13.1085	19.6756	17.4667	12.9234	12.0667	11.6378	13.3761	32.6607	15.7871	13.1124	10.6617	16.0846
ILMN_1733096	ANAPC2	0.98806	0.81592	0.900498	0.890547	0.880597	0.863682	1.02289	0.777114	0.894527	0.867662	0.734328	0.906468	0.742289	0.883582	0.833831	0.836816
ILMN_1813243	ANAPC2	1.24975	1.33134	1.01194	1.35522	1.06468	1.21095	1.60398	1.35423	1.31642	1.12935	1.11144	1.67164	0.983085	1.0995	1.35821	1.56318
ILMN_1802973	ANAPC4	4.6408	3.84776	2.15224	6.47164	3.92637	4.37413	4.82189	6.00796	5.89055	2.98308	3.50746	5.39204	4.19303	4.07761	4.59801	4.68955
ILMN_1723177	ANAPC5	16.5095	13.791	7.81095	12.2945	12.9552	16.4945	15.208	18.4119	21.6587	11.8597	13.7761	24.8149	12.9164	13.4398	15.2239	15.991
ILMN_2199284	ANAPC7	1.2209	0.960199	1.06169	1.23483	1.10249	1.37015	1.09751	1.04677	1.13035	1.199	1.06269	1.43284	1.20199	1.09453	1.07761	1.15224
ILMN_1760727	ANG	4.60995	3.31542	2.11841	3.05373	3.08259	4.08358	3.74925	2.58109	2.68756	3.90746	2.13234	5.41891	3.09652	3.50547	3.17811	3.90448
ILMN_1665871	ANGEL1	2.0607	1.63881	1.16318	1.62985	1.601	1.68657	2.19403	1.86965	1.81393	1.15224	1.4796	1.77512	1.47065	1.40995	1.56318	1.88856
ILMN_1736340	ANGEL2	5.71542	4.3602	2.83781	6.87264	4.43781	6.13731	6.53731	6.50448	6.80796	3.88557	4.76915	9.57015	5.19204	5.0806	5.23483	6.41791
ILMN_2086890	ANGPT1	2.1005	1.41393	1.54428	1.26766	1.48259	1.66866	1.92637	1.2806	1.33632	1.53532	1.28856	1.95622	1.22289	1.54428	1.52935	1.99303
ILMN_1774207	ANGPT2	0.98209	1.01393	0.905473	1.07363	1.02289	1.0607	1.26567	1.02388	0.977114	0.911443	0.897512	0.964179	0.869652	0.961194	0.970149	1.25174
ILMN_1758443	ANGPT4	0.869652	0.876617	0.852736	0.865672	0.928358	0.783085	1.11443	0.887562	0.887562	0.766169	0.881592	0.970149	0.79005	0.882587	0.904478	1.14627
ILMN_2145501	ANGPTL1	0.900498	0.842786	0.912438	0.850746	0.844776	1.07164	1.24378	0.939303	1.01692	0.878607	0.837811	0.964179	0.841791	0.839801	0.872637	1.33532
ILMN_1772612	ANGPTL2	1.10448	0.967164	0.930348	0.946269	0.919403	1.05075	1.87761	0.907463	0.884577	0.880597	0.839801	0.930348	0.838806	0.946269	0.917413	1.33333
ILMN_2143220	ANGPTL3	0.843781	0.838806	0.882587	0.78607	0.927363	0.731343	1.05075	0.793035	0.99801	0.79005	0.768159	0.78607	0.816915	0.833831	0.80398	1.07562
ILMN_1674376	ANGPTL4	1.05771	0.978109	0.98607	1.02189	0.966169	0.915423	2.13333	1.00199	0.911443	0.907463	0.964179	1.09751	0.764179	0.997015	1.06269	2.16318
ILMN_2386444	ANGPTL4	1.10149	0.958209	0.932338	1.00896	0.904478	0.995025	2.42985	0.99403	1.17512	0.961194	0.847761	1.00199	0.960199	0.922388	0.863682	1.78507
ILMN_1707727	ANGPTL4	1.15721	1.27164	0.981095	1.26866	1.05473	1.35423	2.00896	1.10149	1.10547	1.27463	1.01393	1.25274	0.991045	0.930348	1.08756	1.88657
ILMN_2166696	ANGPTL5	0.912438	0.791045	0.871642	0.835821	0.901493	0.969154	1.06667	0.920398	0.900498	0.816915	0.860697	0.987065	0.876617	0.955224	0.821891	0.991045
ILMN_1725518	ANGPTL6	0.963184	1.04577	0.967164	0.929353	1.0398	0.946269	1.21891	1.14627	0.930348	0.847761	0.850746	0.983085	0.897512	0.880597	0.879602	1.24179
ILMN_1813361	ANGPTL7	1.16716	0.935323	1.08756	0.936318	1.07264	1.03483	1.26567	0.970149	0.962189	1.01891	1.01692	1.10448	0.955224	1.0796	1.0398	1.37413
ILMN_2317186	ANK1	1.20896	0.973134	1.00896	0.98209	1.09353	1.03881	1.34328	0.926368	1.15522	0.978109	1.00796	0.974129	1.03682	0.979104	1.19701	1.3005
ILMN_1684694	ANK1	1.18507	1.1801	1.27463	1.22886	1.16716	1.00398	2.38408	1.28557	1.44776	1.19502	0.858706	1.04179	0.904478	1.1403	1.28159	1.93433
ILMN_1776363	ANK2	0.848756	0.891542	0.849751	0.79602	0.842786	0.886567	1.03881	0.972139	0.802985	0.828856	0.800995	0.832836	0.81194	0.771144	0.773134	1.07662
ILMN_1652729	ANK2	0.907463	0.879602	1.02388	1.02886	0.907463	0.915423	1.39602	0.930348	0.851741	0.905473	0.820896	0.876617	0.806965	0.858706	0.932338	1.3204
ILMN_1661875	ANK3	1.04478	1.09254	1.10945	1.08259	1.16816	1.10448	1.91642	0.978109	1.08657	1	0.98806	1.11244	0.947264	1.13234	1.12438	1.65672
ILMN_2390609	ANK3	1.19005	1.06468	1.0398	1.1403	1.0597	1.21692	1.23085	1.1204	1.19204	1.13731	1.0597	1.14229	0.98408	1.05771	1.1403	1.19104
ILMN_1651943	ANK3	1.15224	1.02388	1.02886	0.917413	1.00597	0.929353	2.09552	1.04378	0.968159	0.897512	0.865672	0.973134	1.02189	1.06169	0.963184	1.63284
ILMN_2112829	ANKAR	1.17114	1.01493	0.862687	1.26965	1.02388	0.989055	1.46667	1.08159	1.06269	0.910448	0.848756	1.24478	0.914428	1.08856	1.11343	1.32736
ILMN_1813139	ANKDD1A	1.53134	1.40498	1.37413	2.04179	1.4607	1.92935	2.05871	1.61294	3.28458	1.54527	1.46766	1.33532	1.56318	1.4	1.44478	1.97413
ILMN_1811239	ANKFN1	0.894527	0.888557	0.8199	0.909453	0.948259	0.848756	1.34726	0.889552	0.898507	0.820896	0.754229	0.8	0.735323	0.79602	0.773134	1.35323
ILMN_1794470	ANKFY1	4.6995	3.8597	2.98507	6.00697	4.04378	5.63284	5.87861	4.98806	4.9791	3.401	3.27463	6.9194	4.63284	4.13831	3.86368	4.81294
ILMN_1801464	ANKFY1	1.59701	1.46667	1.2806	2.97512	1.42289	2.30647	2.34726	2.21393	2.33333	1.35025	1.66667	2.74826	1.63383	1.52637	2.24179	2.03682
ILMN_1735364	ANKFY1	1.14925	0.98209	0.991045	1.39602	1.08856	1.17015	1.38209	1.05871	1.1194	0.883582	1.01294	1.22985	1.05572	0.933333	1.03881	1.35124
ILMN_1692080	ANKH	0.991045	0.914428	1.19801	0.956219	0.945274	1.03483	2.17015	0.864677	1.07662	1.001	0.912438	1.02289	1.13234	0.901493	0.912438	1.94428
ILMN_2341382	ANKHD1	1.22488	1.0408	1.23582	1.35124	1.0806	1.38507	1.33731	1.08557	1.07861	1.1393	0.967164	1.15522	1.05373	1.11045	0.957214	1.1791
ILMN_1778304	ANKHD1	0.907463	0.914428	0.919403	0.914428	1.00896	0.783085	1.27463	0.842786	0.918408	0.864677	0.766169	0.853731	0.791045	0.879602	0.831841	1.13532
ILMN_1766560	ANKHD1-EIF4EBP3	1.83881	1.93134	1.02388	1.43781	1.26567	1.28756	2.00995	1.62886	1.53234	1.33134	1.61493	2.40697	1.08458	1.55721	1.57214	1.96617
ILMN_1797873	ANKK1	0.999005	0.870647	0.837811	0.970149	0.935323	0.900498	1.37114	0.976119	0.885572	0.858706	0.795025	0.80796	0.870647	0.916418	1.05075	1.11542
ILMN_1675483	ANKMY1	3.09851	3.5005	1.77114	2.801	2.32637	2.31144	3.16816	3.37313	3.52935	1.82886	3.03582	3.60299	2.43483	2.25075	2.76119	3.2995
ILMN_2251062	ANKMY1	0.839801	0.968159	0.900498	0.937313	1.00299	0.875622	1.20498	0.919403	0.981095	0.818905	0.871642	0.971144	0.99005	1.02388	0.98209	1.0398
ILMN_1799369	ANKMY1	0.99403	0.913433	0.860697	0.901493	0.99005	0.876617	1.26766	0.849751	0.911443	0.867662	0.776119	0.848756	0.80398	0.907463	1.01095	1.24577
ILMN_1784292	ANKMY2	2.22488	1.76318	1.17313	2.4398	1.79403	2.70448	2.26567	2.00299	2.0806	1.56816	1.93532	2.85871	1.69552	1.8796	1.93333	2.46965
ILMN_2185563	ANKRA2	3.13035	1.96418	2.08756	4.34925	2.06169	3.93532	2.78308	2.44279	2.74229	2.15224	3.0209	5.94229	3.10846	2.29154	2.70746	2.62388
ILMN_1716264	ANKRD1	1.02488	0.886567	0.877612	0.995025	0.933333	0.850746	1.31841	0.875622	0.860697	0.965174	0.80199	0.847761	0.822886	0.98408	0.852736	1.10547
ILMN_2115218	ANKRD10	3.2607	2.28358	1.84577	3.51244	2.65373	4.03383	3.59502	2.74726	2.70746	2.47065	2.59602	5.00995	2.50149	2.48955	2.72139	2.80597
ILMN_2108709	ANKRD11	8.09254	5.94129	5.38507	9.29552	6.50746	9.82886	6.84378	6.36816	7.25274	5.71443	7.83682	13.9871	6.2408	6.13234	6.82488	6.61791
ILMN_1661833	ANKRD12	5.2408	3.55622	2.97413	5.23682	3.76418	4.98905	5.11642	3.90945	4.27264	3.22985	4.77413	9.42587	3.6398	4.68358	3.78408	4.84279
ILMN_1689908	ANKRD13A	22.4567	17.6637	14.802	20.0796	15.9005	23.5731	29.1552	19.8557	19.0468	16.5652	21.3622	39.6189	15.1473	21.8259	16.9592	29.3612
ILMN_1794070	ANKRD13B	1.05174	1.00796	0.999005	0.910448	1.00896	1.00199	1.34129	0.991045	1.04378	0.872637	0.931343	1.00199	0.850746	0.943284	0.972139	1.2199
ILMN_2148507	ANKRD13C	1.17512	1.04179	1.03383	1.46567	1.04975	1.33731	1.2398	1.14627	1.03682	1.00299	1.12139	1.80995	1.07761	1.0806	1.14726	1.21592
ILMN_1662902	ANKRD13D	1.08557	0.98408	0.966169	0.999005	0.884577	1.19602	1.52338	0.991045	0.944279	1.05572	0.883582	1.29055	1.03781	0.99403	0.979104	1.3194
ILMN_1659156	ANKRD16	1.41592	1.34129	1.07463	1.43085	1.25075	1.38408	1.58408	1.25174	1.31144	1.1393	1.16517	1.41493	1.07065	1.13532	1.34627	1.54428
ILMN_1675435	ANKRD16	1.14826	0.98607	0.906468	0.975124	0.983085	1.0597	1.8199	0.822886	1.05473	0.878607	0.735323	1.0209	1.02687	0.868657	0.938308	1.70249
ILMN_2353431	ANKRD16	1.02985	1.10746	0.964179	1.15323	0.978109	1.06468	1.47463	0.899502	1.0199	0.973134	0.9801	1.0209	0.839801	0.937313	0.944279	1.30945
ILMN_1787064	ANKRD17	1.24677	1.06965	1.10249	1.30448	1.0995	1.36617	1.5592	1.2199	1.17313	1.1393	1.06965	1.48557	1.19602	1.26468	1.17015	1.24677
ILMN_2406335	ANKRD17	1.43881	0.99403	1.06965	1.52736	1.18209	1.5801	1.67562	1.24975	1.26567	1.04378	1.23085	2.09154	1.24179	1.25771	1.16617	1.4806
ILMN_1712019	ANKRD17	2.21791	1.61393	1.44776	2.56219	1.60896	2.47562	2.4597	1.9194	2.2209	1.52736	1.92239	4.07662	2.01194	1.91343	2.16219	2.25473
ILMN_1666221	ANKRD19	0.991045	0.864677	0.967164	1.00199	0.903483	0.931343	1.28358	0.931343	0.886567	0.850746	0.775124	1.02985	0.908458	0.925373	0.894527	1.24279
ILMN_1682547	ANKRD2	0.98408	0.928358	0.865672	0.887562	0.937313	0.964179	0.972139	0.882587	0.864677	0.936318	0.79602	0.968159	0.851741	0.879602	0.895522	1.06567
ILMN_2215824	ANKRD20A1	1.5204	1.41692	1.10149	1.79602	1.82388	1.26965	1.69055	1.59801	2.91642	1.83284	1.83881	2.80597	1.71045	1.36517	2.11642	2.61891
ILMN_2289424	ANKRD20A3	0.926368	0.901493	0.891542	0.882587	1.04677	0.900498	1.06468	0.878607	0.837811	0.80597	0.80995	1.01294	0.806965	0.874627	0.907463	1.05771
ILMN_2398211	ANKRD20A3	0.954229	0.995025	0.873632	0.917413	0.99403	0.765174	1.60597	0.952239	0.854726	0.818905	0.911443	0.902488	0.732338	0.8199	0.967164	1.46567
ILMN_1680631	ANKRD20B	1.13333	0.916418	0.818905	0.912438	0.999005	0.837811	1.57015	0.80597	0.835821	0.933333	0.78408	0.892537	0.837811	0.81791	0.833831	1.3194
ILMN_2181867	ANKRD20B	0.900498	0.833831	0.79403	0.831841	0.916418	0.898507	1.1403	0.833831	0.918408	0.773134	0.825871	0.835821	0.874627	0.878607	0.791045	1.01791
ILMN_1757147	ANKRD20B	0.902488	0.945274	0.822886	0.864677	0.937313	0.928358	1.26368	0.823881	0.879602	0.877612	0.812935	0.829851	0.767164	0.875622	0.827861	1.15224
ILMN_1671812	ANKRD21	0.972139	0.897512	0.892537	0.884577	0.974129	0.878607	1.23085	0.887562	0.843781	0.901493	0.769154	0.884577	0.79005	0.870647	0.821891	1.06468
ILMN_2132599	ANKRD22	1.31144	1.09353	1.17612	1.95025	1.05672	1.23682	1.86368	1.13134	1.21791	1.31841	1.2607	2.57313	1.1005	1.11542	1.20896	1.99303
ILMN_2227338	ANKRD23	1.06169	1.1204	0.932338	1.04577	1.06468	0.976119	1.88756	1.03483	0.955224	1.001	0.877612	1.0408	0.887562	1.06766	0.926368	1.44279
ILMN_2101368	ANKRD24	0.949254	0.885572	0.900498	0.938308	0.930348	0.916418	1.2	0.857711	0.894527	0.79204	0.765174	0.939303	0.954229	0.958209	0.858706	1.02388
ILMN_1740161	ANKRD26	1.14726	1.01294	1	1.15522	1.04478	1.33433	1.54229	1	1.13433	0.921393	0.937313	1.21493	1.13234	0.967164	0.972139	1.35124
ILMN_1794063	ANKRD27	1.44776	1.21692	1.04378	1.26269	1.1791	1.45075	1.41692	1.28358	1.27861	1.17413	1.15721	1.74229	1.2398	1.44876	1.31045	1.60597
ILMN_2232520	ANKRD28	1.70547	1.31741	1.23284	1.40995	1.5592	1.6209	2.401	1.34328	1.88458	1.32836	1.29652	2.27264	1.34328	1.45075	1.43184	2.34627
ILMN_2075643	ANKRD29	0.9801	0.768159	0.888557	0.920398	0.919403	0.886567	1.20995	0.836816	0.847761	0.841791	0.835821	0.828856	0.881592	0.835821	0.925373	1.12239
ILMN_1813607	ANKRD30A	0.867662	0.868657	0.877612	0.835821	0.827861	0.838806	1.10547	0.933333	0.985075	0.911443	0.849751	0.902488	0.866667	0.872637	0.890547	1.09154
ILMN_1796059	ANKRD30A	0.936318	0.867662	0.900498	0.904478	0.950249	0.856716	1.49154	0.840796	0.78607	0.884577	0.828856	0.929353	0.828856	0.894527	0.823881	1.07662
ILMN_2214278	ANKRD32	1.54129	1.52935	1.04279	1.34527	1.37512	1.20597	2.38507	1.16517	1.29652	1.22587	1.04279	1.68756	1.28557	1.38408	1.25274	1.97413
ILMN_1667748	ANKRD33	4.71841	5.45274	3.67761	5.47463	4.05871	4.61592	5.10149	4.96318	5.05473	3.57612	4.64478	6.10945	3.5194	4.17413	4.30945	5.49652
ILMN_2119793	ANKRD34A	1.29453	1.18607	1.15124	1.32438	1.40597	1.39403	1.77811	1.35622	1.45274	1.10348	1.13333	1.27662	1.13433	1.26965	1.20299	1.74726
ILMN_1655766	ANKRD34B	1.07861	0.910448	0.943284	0.922388	0.897512	1.2806	1.24776	1.00796	0.927363	0.935323	0.973134	1.38308	0.855721	1.01294	0.950249	1.32736
ILMN_2145153	ANKRD35	0.888557	1.03582	1.07065	0.930348	1.03184	1.10249	2.31244	0.942289	0.946269	0.880597	0.872637	0.904478	0.823881	0.838806	0.852736	1.87164
ILMN_2382431	ANKRD36	1.1592	0.99005	1.02587	1.22488	1.0806	1.27861	1.16617	1.07562	1.22587	1.15821	0.953234	1.0796	1.01095	1.00498	0.973134	1.17711
ILMN_2280568	ANKRD36	1.1801	1.00995	0.943284	1.63184	1.03383	1.7602	1.199	1.12836	1.44677	0.957214	0.965174	1.08458	1.14925	0.921393	1.25473	1.02786
ILMN_1780806	ANKRD36B	1.64876	1.18209	1.18607	2.05771	1.32537	2.30746	1.79303	1.57811	1.7791	1.35224	1.35622	1.69652	1.65572	1.4209	1.49552	1.53134
ILMN_2189614	ANKRD36B	1.20995	1.00199	1.08657	1.14428	1.14129	1.12537	1.43284	1.19801	1.26667	1.04577	1.09055	1.20498	0.937313	1.02189	1.19104	1.28358
ILMN_1756417	ANKRD37	1.62388	1.39303	1.21891	1.55323	1.54129	1.61393	1.70149	1.39005	1.64279	1.59303	1.13632	1.54925	1.28856	1.2	1.24876	1.59502
ILMN_1776936	ANKRD38	1.12438	1.08955	0.840796	0.997015	1.08955	1.23383	1.74726	1.07861	1.1204	1.10846	0.978109	1.20995	1.04677	1.05672	1.02189	1.4995
ILMN_1710979	ANKRD39	2.11642	2.15721	1.28955	2.04876	1.88756	1.7194	2.52537	1.82488	2.12637	1.75323	1.55721	1.94826	1.60796	2.11244	1.60796	2.31841
ILMN_1758846	ANKRD40	1.12836	1.02687	0.897512	1.11443	1.06169	1.04179	1.62388	1.02886	1.13234	0.940299	0.964179	1.10647	0.906468	1.01791	0.898507	1.55124
ILMN_2091590	ANKRD41	1.20199	1.12836	1.07861	1.21891	1.06866	1.26866	1.37313	1.11244	1.19602	1.00896	1.04677	1.24677	1.07463	1.0806	1.08856	1.44776
ILMN_1676605	ANKRD42	0.910448	0.880597	0.932338	0.8	0.932338	0.944279	1.01194	0.903483	0.774129	0.831841	0.789055	1.001	0.854726	0.839801	0.823881	1.01592
ILMN_1779882	ANKRD43	0.942289	0.959204	0.920398	0.939303	0.969154	0.836816	1.34328	0.917413	0.851741	0.841791	0.799005	0.888557	0.904478	0.974129	0.901493	1.21791
ILMN_2059844	ANKRD44	1.59701	1.55224	1.4209	2.63284	1.64378	1.71542	2.80995	3.04378	3.61592	1.05274	1.90149	2.84876	1.21692	1.36816	2.6995	2.65672
ILMN_1733716	ANKRD45	1.00597	0.967164	0.954229	1.22587	0.955224	1.01393	1.65672	1.07463	1.11841	0.931343	1.00299	1.12736	0.891542	0.877612	1.0209	1.38408
ILMN_1712298	ANKRD46	2.34826	1.84577	1.33234	2.05871	2	2.42289	2.93831	1.99801	2.04478	1.42786	1.57612	3.51741	1.93134	2.19104	1.97512	2.56716
ILMN_1755588	ANKRD47	1.15622	1.14328	1.04378	1.12239	1.11343	1.09453	1.3403	0.900498	1.12438	1.1791	0.967164	1.08358	1.11343	1.08159	1.03781	1.31144
ILMN_1669259	ANKRD49	3.7602	2.62388	2.15721	4.41891	2.69652	3.99502	4.49154	3.11542	3.70448	2.32139	3.4607	7.84776	3.24378	3.00597	3.08557	4.07065
ILMN_1728957	ANKRD5	0.962189	0.99204	1.0209	0.932338	0.857711	0.963184	1.01393	1.02985	0.808955	0.888557	0.728358	0.944279	0.916418	1.14925	0.921393	1.06866
ILMN_1793466	ANKRD5	0.914428	0.804975	0.874627	0.766169	0.905473	0.890547	1.28358	0.891542	0.842786	0.887562	0.781095	0.737313	0.769154	0.710448	0.79005	1.03781
ILMN_2367300	ANKRD5	0.948259	0.873632	0.893532	0.928358	0.881592	0.850746	1.23582	0.883582	0.856716	0.950249	0.771144	0.810945	0.845771	0.855721	0.80398	1.43582
ILMN_2226304	ANKRD50	1.6607	1.34428	1.30249	1.85771	1.39303	2.00398	1.95821	1.25075	1.47264	1.44677	1.26567	2.3602	1.19303	1.21493	1.30249	1.93433
ILMN_1772660	ANKRD53	1.02886	1.09751	1.04179	1.03781	1.01791	1.12537	1.39303	0.974129	0.923383	0.936318	0.908458	0.957214	0.884577	1.0199	1.01791	1.48259
ILMN_1766309	ANKRD54	1.26468	1.21592	1.0398	1.30547	1.17711	1.201	1.84577	1.37811	1.34925	1.1403	1.17512	1.28856	1.15423	1.16517	1.17015	1.67065
ILMN_2341724	ANKRD55	1.54826	1.1602	1.40796	2.05672	1.72935	1.5194	2.11343	1.97711	2.03781	1.37413	1.18209	2.3791	1.55025	1.25174	1.64577	1.85473
ILMN_2072045	ANKRD56	0.932338	0.882587	0.912438	0.914428	0.893532	0.824876	1.08756	0.802985	1.02388	0.882587	0.80995	0.907463	0.789055	0.905473	0.944279	1.11542
ILMN_1724040	ANKRD57	1.41493	1.49154	1.13731	1.43682	1.22886	1.59502	1.54428	1.36219	1.70846	1.22687	1.09652	1.79403	1.37214	1.39602	1.11542	1.92139
ILMN_2178587	ANKRD6	1.47562	1.33731	1.49353	1.5403	1.5194	1.73134	1.85572	1.50348	1.60498	1.36219	1.61493	2.0806	1.46269	1.40597	1.3602	1.91443
ILMN_2354930	ANKRD7	1.12836	0.885572	1.06567	0.983085	1.06965	1.01493	1.87164	1.03383	1.17512	0.98408	0.839801	1.0995	0.993035	1.00796	0.967164	1.62786
ILMN_1779951	ANKRD7	0.858706	1.00199	0.966169	0.891542	1.07065	0.942289	1.57512	0.900498	1.05174	0.960199	0.903483	0.974129	0.935323	0.958209	0.951244	1.2796
ILMN_2048607	ANKRD9	5.58408	5.02189	4.86766	4.90547	3.67164	10.0985	5.69552	7.60896	7.81095	7.77711	4.05174	11.3323	3.12239	5.37214	5.76418	7.12338
ILMN_1813669	ANKS1A	4.93532	3.72736	3.60796	4.46269	4.49154	6.34229	5.11741	3.42488	3.48159	3.53035	3.83881	8.25274	3.78209	3.87662	3.63184	4.84677
ILMN_1758392	ANKS1B	0.981095	0.864677	0.935323	0.897512	0.956219	0.797015	1.48557	0.881592	0.955224	0.820896	0.833831	0.846766	0.887562	0.909453	0.880597	1.17612
ILMN_1696131	ANKS1B	0.883582	1.0209	0.849751	0.99005	0.886567	0.808955	0.977114	0.838806	0.789055	0.899502	0.810945	0.873632	0.835821	0.849751	0.864677	1.06567
ILMN_2340974	ANKS1B	1.13333	1.02985	0.872637	0.922388	1.11045	0.966169	1.12537	1.02687	1.18607	1.05572	0.808955	0.920398	0.983085	1.15224	0.930348	1.2806
ILMN_1751636	ANKS3	0.989055	0.943284	0.991045	0.858706	0.943284	0.905473	1.1393	1.09453	1.12736	0.99602	0.890547	0.947264	0.814925	0.946269	1.00498	1.13035
ILMN_2199658	ANKS4B	1.01095	0.936318	0.956219	1.00199	0.969154	1.16617	1.20299	0.903483	0.956219	0.899502	0.905473	0.99602	0.857711	0.915423	0.877612	1.2408
ILMN_1735108	ANKS6	1.02786	0.916418	0.920398	1.03881	0.987065	0.954229	1.11045	0.951244	0.917413	0.964179	0.883582	0.959204	0.98806	0.915423	0.888557	0.999005
ILMN_1677487	ANKZF1	3.25672	4.70547	2.13632	3.2796	3.78507	3.03284	3.97612	4.98607	4.74229	2.18109	4.09353	4.33731	2.52239	3.40697	3.81294	4.39204
ILMN_2273796	ANKZF1	0.972139	1.00995	1.03483	1.05075	0.995025	1.03085	1.11244	1.02289	1.03085	0.967164	0.865672	0.956219	1.07562	1.1204	0.99801	1.20697
ILMN_2370692	ANKZF1	1.16816	1.18706	1.06567	1.0806	1.08159	1.19005	1.20199	1.15323	1.18905	0.993035	1.24179	1.22587	0.963184	1.00299	1.08557	1.2
ILMN_1739645	ANLN	1.04876	0.916418	1.02388	1.00299	0.889552	0.964179	1.45174	0.939303	1.00398	0.859701	0.863682	1.00199	0.859701	0.913433	0.975124	1.34826
ILMN_1767111	ANO10	1.66866	1.62388	1.41493	1.25075	1.37313	1.34328	1.93632	1.18507	1.31144	1.49154	1.4209	2.19701	1.11841	1.29154	1.34726	1.94527
ILMN_2228215	ANO4	0.937313	0.98607	0.921393	1.01493	0.941294	0.971144	1.27562	0.890547	1.02388	0.922388	0.953234	1.12239	0.898507	0.960199	1.00398	1.17214
ILMN_1690154	ANO5	1.0199	0.947264	0.911443	1.16119	0.924378	1.2607	1.57214	0.891542	0.845771	0.931343	0.98209	1.01493	0.933333	0.868657	0.927363	1.31045
ILMN_1674941	ANO6	5.85274	4.1005	3.75622	4.52537	4.13632	5.16219	5.78507	5.43582	5.6796	5.51343	3.38806	7.86667	4.19403	4.73134	4.32438	5.28657
ILMN_1675423	ANO7	0.865672	0.886567	0.867662	0.914428	0.920398	0.928358	1.08657	0.789055	0.806965	0.922388	0.890547	0.903483	0.804975	0.850746	0.98408	1.07562
ILMN_1683824	ANO7	1.19204	0.922388	1.06368	1.09055	1.1791	1.16219	1.46866	0.951244	0.976119	0.98607	0.958209	1.18109	0.866667	1.06269	1.1403	1.42488
ILMN_1732948	ANO7	0.955224	0.896517	0.871642	0.961194	0.962189	0.863682	1.51045	0.909453	0.875622	0.827861	0.705473	0.836816	0.797015	0.750249	0.793035	1.27662
ILMN_1709124	ANO8	1.28955	1.33831	1.09652	1.37114	1.18209	1.38507	1.44975	1.25771	1.2408	1.08856	1.24577	1.32239	1.1602	0.958209	1.11244	1.601
ILMN_1762629	ANO9	1.601	1.57313	1.32239	1.63682	1.35522	1.33134	1.72637	1.89154	1.69652	1.19204	1.19104	1.38706	1.21493	1.37313	1.35224	1.88458
ILMN_1798679	ANO9	1.33831	1.74627	1.01294	1.35522	1.4597	1.23284	1.39801	2.17413	2.2597	0.916418	1.37214	1.33532	1.22388	1.24677	1.36418	1.6597
ILMN_1807945	ANP32A	2.35622	1.85871	1.71542	1.92537	1.75423	1.95025	1.96915	2.37512	2.12239	2.24279	1.83582	1.81095	2.23582	3.30647	2.09453	2.46866
ILMN_1684293	ANP32B	67.1343	56.0567	55.6378	55.1035	50.4517	64.5144	84.2488	62.0468	74.8249	65.8229	47.7592	86.3761	53.9075	72.5572	54.9423	82.4577
ILMN_2151412	ANP32C	0.906468	0.920398	0.954229	0.904478	0.961194	0.877612	1.24577	0.797015	0.851741	0.838806	0.770149	0.931343	0.814925	1.01194	0.924378	1.2199
ILMN_1728191	ANP32D	0.878607	0.834826	0.845771	0.810945	0.839801	0.791045	1.29453	0.845771	0.80199	0.855721	0.739303	0.862687	0.760199	0.738308	0.823881	1.22189
ILMN_1684923	ANP32E	0.917413	0.915423	0.922388	0.99403	0.962189	0.828856	1.67065	1.00597	1.02587	0.932338	0.768159	0.915423	0.78408	0.78607	0.739303	1.78308
ILMN_1763837	ANPEP	16.5692	26.3114	16.992	14.809	19.1632	16.9493	19.3363	19.6159	16.8716	18.9851	20.2567	36.9861	14.202	24.4647	12.5443	24.0796
ILMN_1670379	ANTXR1	1.19602	1.00398	1.01194	1.07363	1.07861	0.963184	1.38209	0.999005	1.18905	1.05075	0.854726	1.00199	0.971144	1.11244	1.05473	1.3403
ILMN_1811877	ANTXR1	1.41095	1.20597	1.10249	1.23781	1.22786	1.23582	1.69751	1.38706	1.37811	1.14726	0.875622	1.50647	1.27164	1.30846	1.12239	1.77811
ILMN_2387995	ANTXR1	1.13532	1.01791	0.963184	0.99005	0.940299	0.929353	1.25771	0.99005	0.938308	0.829851	0.875622	0.916418	0.871642	0.928358	1.01791	1.201
ILMN_1812926	ANTXR2	13.2726	12.3284	6.74527	8.18806	9.199	10.1144	15.0935	9.86866	9.60597	9.55124	10.0637	26.202	9.39701	12.7204	9.71343	15.9284
ILMN_1668566	ANUBL1	0.975124	0.946269	0.904478	0.934328	0.954229	0.838806	1.34726	0.889552	0.929353	0.816915	0.845771	1.08159	0.753234	0.916418	0.862687	1.25274
ILMN_2184184	ANXA1	53.0388	39.9114	28.3871	50.1323	39.9383	56.5134	74.4826	45.008	47.1711	36.9781	47.0109	113.677	37.8836	32.1085	44.2935	66.5055
ILMN_1699421	ANXA10	0.979104	0.841791	0.864677	0.910448	0.900498	0.929353	1.21095	0.851741	0.954229	0.831841	0.876617	0.943284	0.824876	0.908458	0.977114	1.11343
ILMN_2380494	ANXA11	5.7005	3.90846	3.77214	4.26368	3.97114	5.19801	5.1204	5.4398	4.83781	3.51144	5.20796	9.43085	3.82886	5.27562	4.95821	4.75224
ILMN_1685170	ANXA11	14.1303	8.76816	9.5393	10.2537	9.25473	12.3164	9.5592	13.2289	12.2378	8.96418	10.6398	26.0507	9.68955	11.7672	10.2716	9.28955
ILMN_1807003	ANXA11	1.55721	1.55821	1.10149	1.54627	1.40995	1.49652	2.86567	1.91443	1.9393	1.35622	1.18706	1.99005	1.36915	1.57711	1.59303	2.4398
ILMN_2412490	ANXA13	0.893532	0.853731	0.862687	0.987065	0.889552	0.908458	1.17313	0.951244	0.876617	0.852736	0.870647	0.946269	0.78607	0.875622	0.851741	1.21692
ILMN_1737612	ANXA13	0.879602	0.814925	0.963184	0.844776	0.906468	0.842786	1.17811	0.902488	0.917413	0.897512	0.836816	0.905473	0.824876	0.837811	0.921393	1.04279
ILMN_1799243	ANXA13	0.995025	0.918408	0.858706	0.890547	0.906468	0.812935	1.3005	0.866667	0.912438	0.920398	0.78408	0.897512	0.696517	0.823881	0.842786	1.0995
ILMN_1711899	ANXA2	2.75423	1.28259	1.9005	4.99403	1.59602	5.73234	1.67363	1.57313	2.12239	2.99204	1.72935	4.87662	3.35522	1.9393	1.96816	1.61493
ILMN_1755937	ANXA2	1.71443	1.48856	1.25771	1.80796	1.35423	1.84577	2.32438	1.40995	1.71741	1.42985	1.38109	2.14328	1.4408	1.56617	1.34229	1.97015
ILMN_2409167	ANXA2	49.4119	37.2796	20.7781	53.2746	30.8478	53.1214	43.7403	34.4915	45.992	41.393	31.8348	68.6498	45.4209	40.597	29.802	43.0706
ILMN_2041101	ANXA2P1	8.28756	6.60597	3.52836	8.20995	5.71841	8.71741	6.45373	7.60597	9.00199	7.37612	6.99104	11.5393	7.31343	6.41891	7.15323	7.49453
ILMN_1694548	ANXA3	1.72537	1.34129	1.19204	1.32736	1.1602	1.63085	2.58408	1.2	1.4408	1.43184	1.64179	3.13632	1.10448	1.12139	1.36219	2.2199
ILMN_1711408	ANXA4	1.10149	0.914428	0.958209	1.24677	0.952239	1.41095	1.33632	1.00498	0.959204	1.03383	0.893532	1.3393	0.937313	0.959204	0.99602	1.3194
ILMN_1741003	ANXA5	16.592	16.4428	10.7085	20.6945	11.0955	18.2706	15.4249	12.8945	12.3463	16.7672	11.6169	33.0299	14.202	14.0876	14.4308	12.6547
ILMN_2326591	ANXA6	1.60896	1.801	1.08358	1.71741	1.41194	1.7602	2.2199	1.92935	1.72935	1.401	1.30945	1.91045	1.7791	1.48458	1.52338	2.04279
ILMN_1678612	ANXA6	2.99403	2.86368	1.44876	2.91244	2.34726	2.27662	2.48259	2.46567	2.8398	2.06169	2.32338	3.12836	2.66667	2.40796	2.26368	2.52836
ILMN_1662322	ANXA7	0.920398	0.870647	0.872637	0.871642	0.850746	0.820896	1.37612	0.852736	0.81393	0.767164	0.777114	1.01095	0.783085	0.829851	0.845771	1.22687
ILMN_1703791	ANXA7	10.2876	6.62985	5.62587	9.90945	7.03483	11.0786	14.2786	7.44279	8.28259	6.52139	7.55821	17.8259	7.79403	8.3602	7.11841	11.0846
ILMN_2095610	ANXA8	1.14726	1.05274	0.975124	1.08955	1.0806	0.949254	1.13433	1.07662	0.906468	1.001	0.859701	0.884577	0.975124	0.894527	0.906468	1.16418
ILMN_2186983	ANXA8L2	1.10149	1.06667	1.02687	0.99204	1.19005	0.929353	1.25373	1.10448	1.1194	1.11443	0.877612	1.05075	1.10746	1.14925	1.12239	1.14826
ILMN_2217601	ANXA9	0.915423	0.882587	0.895522	1.01791	0.880597	0.837811	1.36816	0.877612	0.957214	0.918408	0.799005	0.847761	0.885572	0.859701	0.917413	1.30945
ILMN_1709820	AOAH	9.44677	6.70149	4.63582	7.88458	5.27264	7.42488	8.96617	5.83781	8.96716	5.67363	6.72935	11.4129	5.35224	7.24577	4.69055	8.43383
ILMN_1799863	AOC2	1.2408	1.23881	1.20199	1.11741	1.15721	1.10448	1.40398	1.14428	0.997015	1.02289	0.896517	1.1592	1.14229	1.17313	1.10249	1.22488
ILMN_1741431	AOC2	0.961194	1.09154	1.00697	0.936318	1.06965	1.07164	1.48856	0.967164	0.957214	0.978109	0.862687	1.09552	0.850746	0.916418	0.947264	1.47662
ILMN_2405185	AOC2	1.21194	1.15224	1.0199	1.16816	1.19502	1.05871	1.2408	1.05871	1.02886	0.98408	0.977114	1.34527	0.871642	1.10746	1.09851	1.34328
ILMN_1782086	AOC3	1.04677	1.02587	0.9801	1.05672	0.935323	1.07264	3.14428	0.978109	0.997015	0.80597	0.941294	1.17313	0.958209	0.958209	0.963184	2.6
ILMN_1781537	AOF1	0.966169	0.941294	0.955224	1.11741	0.978109	1.02886	1.3194	0.944279	1.03284	0.958209	0.863682	1.0796	0.899502	0.972139	0.911443	1.2398
ILMN_1813840	AOF2	4.48458	3.96617	1.9791	4.50547	3.94129	4.01791	4.07463	4.88259	5.55721	3.04577	3.27164	4.98507	3.47164	4.11343	3.94229	4.22388
ILMN_1767113	AOX1	0.954229	0.79005	0.8199	0.845771	0.808955	0.844776	1.27164	0.829851	0.776119	0.757214	0.858706	0.888557	0.748259	0.871642	0.866667	1.02985
ILMN_2387505	AP1B1	1.16318	1.11642	0.791045	1.07164	0.936318	1.02189	1.51642	1.1005	1.08657	0.985075	0.967164	1.44677	0.926368	0.991045	1.03682	1.27363
ILMN_1781983	AP1B1	3.48657	2.84776	1.84776	3.46766	2.44577	3.27264	3.72736	2.62587	3.29453	2.49751	2.52239	4.43582	2.72736	3.23184	2.45771	3.03781
ILMN_2399622	AP1G1	6.51443	4.35224	2.64677	3.98905	4.06169	4.00995	5.23781	4.54627	5.75721	3.88358	4.71841	9.96617	4.16716	6.55821	4.86368	4.31144
ILMN_2276598	AP1G2	0.914428	1.01294	0.947264	0.855721	0.945274	0.861692	0.99801	0.893532	1.001	0.749254	0.693532	0.773134	0.737313	0.911443	0.779104	1.00597
ILMN_1754179	AP1G2	7.31642	6.98308	2.97413	7.70945	5.27463	6.84677	6.17313	7.73532	9.03383	4.42587	7.49751	10.4149	5.84677	4.7194	7.39204	5.77612
ILMN_1805247	AP1GBP1	1.48557	1.22687	1.18905	1.65572	1.20398	1.8	1.30348	1.03881	1.30249	1.12736	1.04577	2.13134	1.33632	1.12338	1.34826	1.18706
ILMN_2415467	AP1GBP1	1.27662	1.24378	1.28159	1.56816	1.14627	1.49851	1.52438	1.11144	1.24975	1.05871	0.9801	1.91244	1.39801	1.20498	1.19403	1.33134
ILMN_1754738	AP1M1	14.1502	12.4557	8.71542	13.3323	11.1493	14.203	10.1771	11.1333	13.0905	10.0318	10.9612	20.6139	10.207	11.2209	10.8209	10.4517
ILMN_1705861	AP1M2	1.05473	1.11741	0.945274	1.11642	1.06567	0.953234	2.12537	0.956219	1.01393	0.908458	0.941294	0.970149	0.944279	1.0607	0.968159	2.15025
ILMN_1712806	AP1S1	1.67861	1.79204	1.16418	1.13333	1.64677	1.35124	2.39502	1.39204	2.37114	1.50547	0.966169	1.24179	1.5393	1.67363	1.49652	2.12338
ILMN_2316173	AP1S1	1.8597	1.4199	1.00896	1.24179	1.59303	1.76517	1.36418	1.44677	1.89154	1.88657	1.23184	1.40597	1.5393	1.42687	1.58806	1.37612
ILMN_2120273	AP1S2	24.8647	20.2905	11.6697	31.1124	17.4647	27.4597	33.1244	20.6169	22.8836	21.194	15.6139	44.2189	19.8995	27.3861	16.0139	36.3881
ILMN_1768610	AP1S3	0.781095	0.878607	0.79602	0.979104	0.901493	0.858706	1.31045	0.79602	0.873632	0.778109	0.78806	0.728358	0.744279	0.847761	0.845771	1.03682
ILMN_1815306	AP2A1	3.20796	2.91045	2.86866	2.22488	2.81592	2.94627	5.36318	3.26269	3.31841	2.87761	2.12438	2.09552	2.32637	3.60299	2.83483	5.59602
ILMN_2359211	AP2A1	2.74925	2.41095	2.00896	1.79701	1.84876	2.48159	2.03085	2.49154	2.50448	2.51045	2.3801	1.41791	1.8209	2.39801	2.37512	2.19602
ILMN_1673108	AP2A1	1.17413	1.05672	1.06766	0.979104	0.989055	1.00796	1.36219	1.00796	0.974129	1.02388	1.07562	1.08358	0.924378	1.0398	1.01294	1.23284
ILMN_1803779	AP2A2	1.98706	2.21692	1.36219	1.80199	1.5602	1.63682	2.08557	2.01493	2.49254	1.57711	1.91144	2.20697	1.31841	1.53333	1.97711	1.93134
ILMN_1681998	AP2B1	2.72338	3.07662	1.26269	1.23383	2.2607	1.53532	2.21592	3.13433	3.72637	2.04876	1.6796	2.09751	1.87264	2.55622	2.67861	2.33632
ILMN_2331735	AP2B1	2.85572	3.2199	1.26368	1.45075	2.22985	1.85572	2.22886	2.85672	3.64876	2.22189	1.97015	2.15522	1.93035	2.38209	2.31642	2.56517
ILMN_1699598	AP2M1	14.6537	14.802	11.602	7.1204	12.5811	13.2637	13.1532	12.3313	10.7124	14.1264	9.51741	14.2507	12.7552	15.8647	8.90846	16.5612
ILMN_2402798	AP2M1	12.5493	13.5652	8.50746	6.43682	9.75224	10.9035	11.5821	12.405	9.84876	11.4756	7.83383	11.3065	10.7224	12.593	7.61891	14.0915
ILMN_1662426	AP2S1	19.5552	22.3383	21.3512	19.7433	15.5144	21.7721	17.604	16.1771	18.81	27.1801	14.8935	19.9403	18.79	23.6955	16.7005	17.3582
ILMN_1809957	AP2S1	100.453	109.724	107.688	93.2308	95.8507	100.775	121.961	97.6945	106.936	129.577	85.0498	100.057	99.3463	132.491	84.6687	135.042
ILMN_1768867	AP3B1	10.3582	8.83682	5.78706	10.4577	7.41692	9.51144	11.2328	7.82388	7.69552	7.69851	9.86965	21.403	8.29254	10.4925	7.44478	10.6677
ILMN_1679256	AP3B2	0.927363	0.973134	0.893532	0.840796	0.929353	0.920398	1.399	0.814925	0.903483	0.789055	0.869652	0.877612	0.868657	0.767164	0.8199	1.20398
ILMN_2284667	AP3D1	0.993035	0.911443	0.844776	0.910448	0.931343	0.918408	1.2597	0.855721	0.79602	0.876617	0.870647	0.965174	0.81194	0.99801	0.895522	1.26368
ILMN_1764945	AP3D1	4.49652	4.18109	2.49154	4.18109	3.12537	4.04279	4.05672	3.88756	5	3.36617	4.6796	6.37612	3.42587	3.3801	3.74328	4.21891
ILMN_2390114	AP3D1	5.05672	3.60697	2.69453	4.41791	3.56517	4.53333	4.52139	3.93333	4.8199	3.06169	4.56418	6.33134	3.58905	3.43284	3.27761	4.19403
ILMN_2362122	AP3M1	3.14627	2.47065	2.26468	3.59303	2.80697	4.09453	3.70348	2.53731	2.85572	2.94328	2.68458	7.73035	2.86468	3.29154	2.42786	3.74428
ILMN_1701774	AP3M1	0.947264	0.965174	1.01393	0.912438	1.03085	0.910448	1.49751	0.933333	0.947264	1.04577	0.919403	1.12438	0.960199	0.776119	0.983085	1.24179
ILMN_1667086	AP3M1	5.91045	3.82488	3.01592	5.37413	4.05871	6.34925	4.85373	4.23582	4.62388	3.93532	4.73134	12.4657	4.7602	5.02886	3.90249	4.17114
ILMN_1676946	AP3M2	2.55323	2.19005	1.39801	3.16716	2.49453	2.71144	2.56517	2.84478	3.19701	1.65871	2.01592	3.05274	2.17015	1.84478	2.39104	2.20597
ILMN_2311761	AP3S1	2.74925	1.72935	2.26368	3.46567	2.00597	3.56716	3.54428	1.86368	2.42587	2.67662	1.80796	5.49055	2.7005	2.70647	2.23781	2.7393
ILMN_1731596	AP3S2	2.03483	1.60199	1.46567	1.65274	1.47065	2.05572	2.25373	1.37313	1.70547	1.53333	1.40199	2.38308	1.60796	1.60896	1.57313	1.86667
ILMN_1669377	AP4B1	5.74726	4.74328	2.91642	6.74726	4.1005	6.11542	6.10647	6.9592	6.58507	3.09851	5.55423	8.74726	5.13433	4.27363	5.68856	6.16119
ILMN_1754531	AP4E1	2.55821	1.93234	1.52438	2.4796	1.77512	2.42488	2.62687	2.23383	2.60299	1.8	2.23383	3.55622	2.40199	2.33234	2.12139	2.30945
ILMN_1779512	AP4M1	1.0995	1.06269	1.02687	1.06468	1.04975	1.11642	1.24975	1.13433	1.15025	0.979104	0.862687	1.01791	0.831841	0.983085	0.98607	1.32836
ILMN_1760466	AP4S1	1.55025	1.34925	1.26667	1.34726	1.1602	1.27065	1.66269	1.27363	1.42786	1.30149	1.16119	1.44577	1.14925	1.33831	1.25771	1.74826
ILMN_1659463	APAF1	14.9632	11.9015	11.398	15.9284	10.21	16.3542	17.4378	12.0368	14.593	13.3055	14.1821	38.3552	12.804	22.3085	12.0547	18.5005
ILMN_2344798	APAF1	1.35721	1.26766	1.13433	1.32836	1.21493	1.20498	1.8796	1.09652	1.22189	1.04677	1.18408	1.63682	1.12338	1.13433	1.17711	1.48657
ILMN_2182656	APBA1	1.03284	0.907463	0.914428	0.8199	0.922388	0.898507	1.08358	0.867662	0.872637	0.985075	0.838806	0.99204	0.882587	0.911443	0.810945	1.26468
ILMN_1723626	APBA2	1.04577	1.02786	0.879602	1.06269	1.02587	1.11443	1.37811	1.16517	1.23184	0.879602	1.04677	1.15622	0.952239	0.918408	1.17313	1.27861
ILMN_2270491	APBA2BP	0.973134	0.884577	0.804975	0.974129	0.892537	0.941294	1.02289	0.825871	0.875622	0.899502	0.825871	0.895522	0.81194	0.804975	0.866667	1.0806
ILMN_2364928	APBA2BP	1.21692	0.898507	1.04478	1.04876	1.07861	0.884577	2.78806	0.926368	1.01294	0.907463	0.921393	1.05274	0.812935	0.904478	0.940299	1.9801
ILMN_1686610	APBA3	8.61692	7.13333	4.3791	6.47861	6.63383	7.54726	7.30249	5.15025	6.47562	5.79005	7.34328	11.5323	5.85572	5.45274	4.66169	7.06368
ILMN_1769918	APBB1	1.02289	0.887562	0.860697	0.839801	0.914428	0.938308	2.23383	1.00299	0.843781	0.943284	0.847761	0.952239	0.850746	0.927363	0.931343	1.81194
ILMN_1796271	APBB1	0.955224	0.904478	0.880597	0.892537	1.02687	0.867662	1.1791	0.893532	0.905473	0.863682	0.731343	0.970149	0.960199	0.821891	0.942289	1.09453
ILMN_1699646	APBB1	0.965174	0.875622	0.749254	0.8199	0.962189	0.918408	1.27164	0.866667	0.900498	0.947264	0.861692	0.897512	0.900498	0.909453	0.907463	1.17612
ILMN_1801710	APBB1IP	54.9751	38.2468	19.6378	25.1881	30.1363	37.8368	49.7075	29.1602	34.2368	38.3075	40.6219	58.0896	27.5881	49.8318	32.3383	55.7572
ILMN_1716790	APBB2	1.0607	1.02289	0.921393	0.860697	0.944279	0.973134	1.19303	0.912438	0.841791	0.882587	0.756219	0.948259	0.935323	0.959204	0.909453	1.02886
ILMN_1740772	APBB3	10.0388	9.30746	6.47861	15.2109	7.55025	15.0368	8.72338	9.68458	9.69751	7.65672	14.0428	17.406	10.999	8.75821	10.005	9.5602
ILMN_2320513	APBB3	2.50945	1.92836	1.66269	4.01791	1.64876	2.90647	2.98109	2.50647	2.71841	2.02388	3.21095	3.84677	2.29154	1.93433	2.69055	2.72736
ILMN_1662668	APC	1.00597	0.849751	0.881592	0.901493	0.99204	0.858706	1.47761	0.847761	0.880597	0.791045	0.7801	0.78209	0.827861	0.902488	0.78209	1.39602
ILMN_1659950	APC2	1.06169	0.884577	0.896517	0.970149	0.99403	1.00796	1.28458	0.98607	1.09453	0.923383	0.878607	0.921393	0.838806	0.868657	0.962189	1.01791
ILMN_1656951	APCDD1	1.23881	1.14925	1.09652	1.15224	1.09453	1.17512	1.27363	1.12836	1.15323	1.01692	0.929353	1.22289	1.14428	1.07264	1.05075	1.52537
ILMN_1689431	APCDD1L	1.00199	0.899502	0.932338	0.906468	0.908458	0.929353	1.54229	0.965174	0.867662	0.944279	0.906468	0.80398	0.99204	0.913433	0.99801	1.36219
ILMN_1708833	APCS	1.41194	1.49552	1.45473	1.34726	1.37114	1.40995	2.35025	1.30647	1.25771	1.34726	1.09055	1.3403	1.21095	1.4806	1.33632	2.25672
ILMN_1718023	APEH	9.39602	8.6995	3.96318	5.93234	8.00896	6.51443	9.60199	7.96318	8.56915	5.49652	6.39502	10.6159	5.58507	7.46965	5.88756	9.29254
ILMN_2319344	APEX1	8.98706	4.69851	3.50149	8.85075	5.63582	8.30249	5.91443	6.23085	7.4	5.60896	5.69353	11.1582	8.11343	6.74826	6.86567	4.39502
ILMN_1661886	APEX1	14.809	8.94726	4.83582	13.2746	10.9622	12.201	13.1831	11.7881	13.4935	8.50149	9.19005	19.0219	11.6199	9.7801	10.9632	11.3731
ILMN_1652505	APEX2	4.19303	3.85373	2.15721	4.1194	2.98408	3.93035	4.46766	3.13433	3.66269	3.01592	3.1791	5.23682	2.88458	2.83383	2.92935	4.27363
ILMN_1658472	APH1A	14.6129	16.0975	4.65373	7.39403	12.2597	7.69552	10.1871	13.5174	15.0468	9.59303	10.0189	12.7692	11.4886	15.2338	10.0398	9.82886
ILMN_2398388	APH1A	2.10846	2.05373	1.30348	1.40299	1.9592	1.76318	1.84378	2.29751	2.03682	1.3602	1.61393	2.28955	1.66368	2.20697	1.81692	1.88159
ILMN_1767816	APH1B	4.83184	4.70647	2.30945	4.42985	4.10945	4.16617	4.88657	3.89254	4.87164	4.13532	3.90149	6.88358	4.99602	5.97612	3.91144	5.26766
ILMN_1815051	API5	6.53333	4.3602	2.33134	4.99204	4.17015	5.20896	7.02886	4.74925	4.96716	3.77811	4.37612	9.32537	4.78109	5.22189	4.47363	6.29851
ILMN_2128293	APIP	1.55622	1.31244	1.40498	1.65473	1.38209	1.54129	1.78308	1.44677	1.71642	1.46866	1.15721	2.1194	1.39005	1.52935	1.36219	1.79104
ILMN_1788135	APITD1	0.963184	0.892537	0.892537	0.898507	0.917413	0.997015	1.26169	0.963184	0.889552	1.01294	0.843781	0.98209	0.865672	1.04577	1.04378	1.0796
ILMN_1793360	APITD1	1.45871	1.25075	1.21294	1.50249	1.45373	1.29055	1.88856	1.41791	1.6408	1.29652	1.12338	1.62985	1.33831	1.39104	1.53035	1.51642
ILMN_1689353	APLN	1	0.918408	0.947264	0.943284	1.02488	0.955224	1.78308	0.983085	0.976119	0.892537	0.864677	0.901493	0.971144	0.99801	0.845771	1.35423
ILMN_1700183	APLNR	1.01095	0.973134	0.933333	0.878607	0.948259	0.935323	1.31244	0.939303	0.899502	0.845771	0.871642	0.987065	0.867662	1.0607	0.901493	1.3403
ILMN_2396198	APLP1	0.941294	0.908458	0.948259	0.831841	0.868657	0.892537	1.84577	0.762189	0.884577	0.854726	0.79403	0.867662	0.80796	0.884577	0.889552	1.52935
ILMN_1763834	APLP1	0.890547	0.867662	0.881592	0.804975	0.966169	0.849751	1.21393	0.882587	0.838806	0.783085	0.80995	0.926368	0.720398	0.987065	0.841791	1.33035
ILMN_2081465	APLP2	0.979104	0.881592	1.04776	0.979104	0.833831	0.873632	1.14726	0.882587	0.967164	0.877612	1.00796	1.05771	0.943284	0.846766	0.938308	1.201
ILMN_1690884	APOA1	0.9801	0.964179	0.814925	0.895522	1.03184	0.917413	1.08159	0.856716	0.868657	0.853731	0.728358	0.848756	0.887562	0.887562	0.879602	1.25075
ILMN_1729533	APOA1BP	6.73035	5.21791	2.60995	5.15224	5.38109	4.93831	5.51045	4.85373	6.57811	4.3592	4	6.76418	5.27363	5.40995	4.40498	5.47562
ILMN_1688543	APOA2	1.01493	1.00796	0.972139	1.03284	1.01493	1.00697	1.17313	1.05473	0.938308	1.04279	0.834826	1.05373	0.846766	0.972139	1.02687	1.12935
ILMN_1675706	APOA4	0.922388	0.880597	0.870647	0.833831	0.878607	0.757214	1.11443	0.842786	0.908458	0.958209	0.848756	0.855721	0.822886	0.810945	0.81393	0.987065
ILMN_1754055	APOA5	0.978109	0.881592	0.915423	0.973134	0.944279	0.893532	1.24279	1.04776	0.900498	0.797015	0.829851	0.888557	0.81393	0.872637	0.884577	1.17214
ILMN_1664024	APOB	1.07562	0.863682	0.993035	0.924378	0.981095	0.98806	1.47363	0.972139	1.01393	0.955224	0.890547	1.001	0.881592	0.812935	1.00697	1.42289
ILMN_1697925	APOB48R	4.26866	4.00299	2.56119	4.23383	3.09453	3.06667	4.11144	3.51642	4.66269	3.17313	5.06468	6.80199	2.82189	3.5791	2.91542	4.75522
ILMN_1813881	APOBEC1	1.00597	0.853731	0.856716	0.837811	1.02687	0.81592	1.24378	0.875622	0.825871	0.935323	0.754229	1.0796	0.747264	0.795025	0.924378	1.06368
ILMN_1719143	APOBEC2	0.947264	1.07264	1.11144	0.974129	0.964179	1	1.29353	0.921393	0.958209	1.18806	0.956219	1.0796	0.80995	1.01194	0.867662	1.16617
ILMN_1680192	APOBEC3A	2.75721	2.60398	0.80796	4.5403	0.779104	3.87363	2.82587	3.28657	3.03881	2.85174	2.60896	5.57811	0.828856	0.808955	3.3801	2.57512
ILMN_2219466	APOBEC3B	0.968159	0.864677	0.880597	1	0.860697	0.868657	0.950249	0.960199	1.12537	0.882587	0.821891	1.21294	0.743284	0.893532	1.03383	1.0806
ILMN_1675684	APOBEC3C	3.09851	3.27164	1.97512	2.52537	2.43085	1.66766	4.07164	3.18706	4.02388	2.92736	2.76617	5.70149	2.29851	3.6	3.38905	5.26269
ILMN_1661572	APOBEC3D	0.929353	1.06567	0.858706	0.927363	0.993035	1.05871	1.5602	0.878607	0.905473	0.99005	0.79602	0.894527	0.930348	0.929353	0.860697	1.41095
ILMN_2412172	APOBEC3F	2.22587	1.46965	1.63881	3.57811	1.71045	3.13632	2.03682	1.36219	1.99303	1.82488	1.50149	3.24577	2.05473	1.66169	1.62886	1.97313
ILMN_2296950	APOBEC3F	5.57811	3.49851	2.09751	3.43383	2.70448	2.63284	3.66468	3.32736	3.17015	3.27463	2.10846	4.07662	3.25473	3.5194	3.01791	3.13831
ILMN_1710726	APOBEC3F	1.93632	1.72239	1.30249	1.7403	1.54627	1.599	2.22886	1.71144	1.8199	1.42189	1.32935	2.06567	1.54726	1.71244	1.31343	2.10448
ILMN_2232478	APOBEC3G	5.03881	2.35025	2.58308	6.55423	3.51144	5.94925	3.37313	2.05672	3.90547	4.17711	3.98109	8.45174	4.68458	3.00299	3.37114	2.54527
ILMN_1664828	APOBEC3H	1.5602	1.79602	1.03682	1.71443	1.61592	1.43483	1.76318	1.35224	2.46567	1.27562	1.72836	1.54826	1.4597	1.58109	1.54726	1.80299
ILMN_1815425	APOBEC4	0.98607	0.883582	0.910448	0.921393	0.894527	0.841791	1.4209	0.864677	0.907463	0.808955	0.768159	0.838806	0.867662	0.904478	0.859701	1.16318
ILMN_1789007	APOC1	0.983085	0.860697	0.923383	0.905473	1.0607	0.899502	1.73632	0.914428	1.01692	0.893532	0.800995	0.966169	0.881592	1.001	0.98806	1.59104
ILMN_1802923	APOC2	1.11642	1.03881	0.899502	1.00995	1.02687	0.991045	1.3801	0.925373	0.938308	0.926368	0.968159	1.08159	0.868657	0.860697	0.949254	1.20498
ILMN_1722070	APOC3	1.07761	0.974129	0.977114	0.975124	0.922388	0.98607	1.22886	1.00398	0.910448	0.878607	0.898507	0.916418	1.06866	1.00398	1.0199	1.14726
ILMN_1765605	APOC4	1.00199	0.918408	0.99801	0.945274	1.02289	0.885572	1.18607	0.862687	0.945274	0.878607	0.872637	0.970149	0.837811	0.868657	0.948259	1.12139
ILMN_1780170	APOD	0.906468	0.892537	0.859701	0.836816	0.967164	0.80199	0.937313	0.835821	0.808955	0.740299	0.870647	0.828856	0.695522	0.841791	0.81592	1.11443
ILMN_1740938	APOE	0.963184	1	0.955224	0.917413	0.970149	0.927363	1.1602	0.98806	0.967164	0.898507	0.834826	0.950249	0.81393	0.925373	0.975124	1.1791
ILMN_1809311	APOF	1.05771	0.924378	0.828856	1.07164	0.875622	1.00398	1.51741	0.904478	1.01294	0.834826	0.882587	0.960199	0.915423	0.956219	0.958209	1.36617
ILMN_1761511	APOH	0.836816	0.851741	0.841791	0.833831	0.847761	0.867662	1.07662	0.882587	0.829851	0.768159	0.764179	0.968159	0.81194	0.736318	0.81791	0.995025
ILMN_1761793	APOL1	1.24776	1.15622	1.0398	1.24478	1.06368	1.11045	2	1.01294	1.18607	1.06567	1.07861	1.15323	0.999005	1.00498	1.10249	1.74925
ILMN_1688631	APOL1	1.05075	0.933333	0.966169	0.888557	1.01493	1.19701	1.16219	0.889552	1.00299	0.950249	0.929353	1.3005	0.879602	0.964179	1.1602	1.04776
ILMN_1706582	APOL2	1.00199	0.902488	0.808955	0.907463	0.943284	0.932338	1.65075	0.882587	0.967164	1.00597	0.8199	0.885572	0.79801	0.81592	0.879602	1.23682
ILMN_2248822	APOL2	1	0.99005	0.999005	0.943284	1	1.05075	1.02687	0.974129	0.993035	1.03284	0.828856	1.09254	0.883582	1.07562	0.827861	1.33632
ILMN_2325337	APOL2	1.43085	1.10846	1.01095	1.19204	1.31443	1.22289	2.11642	1.31642	1.44478	1.17114	1.17214	1.3204	0.99801	1.06169	1.14428	1.85473
ILMN_2283195	APOL3	0.872637	0.944279	0.79602	0.735323	0.791045	0.851741	1.01393	0.78607	0.812935	0.793035	0.80199	0.842786	0.862687	0.835821	0.834826	0.99801
ILMN_1756862	APOL3	4.95224	4.66965	2.26667	6.44378	3.63582	3.97114	5.04478	5.3791	5.78109	2.76119	4.59204	7.20398	4.12338	3.82388	4.89851	4.31244
ILMN_2369144	APOL3	1.10547	0.954229	0.991045	1.01791	1.1403	1.04975	2.01194	1.08955	0.907463	0.839801	0.99801	0.848756	0.916418	0.977114	0.954229	1.92139
ILMN_1704682	APOL4	1.22488	0.983085	0.937313	0.98209	1.00697	0.841791	2.53234	0.863682	0.894527	0.840796	0.762189	0.877612	0.836816	0.863682	0.953234	1.92637
ILMN_1779070	APOL4	1.15224	0.973134	0.976119	1.01592	1.01791	1.04677	1.22985	1.03085	0.943284	0.911443	0.885572	0.963184	1.00597	0.848756	1.00199	1.24279
ILMN_1676177	APOL5	0.953234	0.99602	1.06766	0.942289	0.933333	1.04478	1.59602	0.937313	0.896517	1.00398	0.870647	0.903483	0.836816	0.884577	0.901493	1.16418
ILMN_1687201	APOL6	1.27761	0.99801	1.05871	1.71045	1.04279	1.56716	1.67761	1.0209	1.02388	0.99204	0.848756	1.38806	1.09353	1.00896	1.02587	1.56915
ILMN_1723522	APOLD1	1.04677	0.879602	0.775124	0.877612	0.78607	0.775124	1.26965	0.942289	0.804975	0.873632	0.81791	0.945274	0.845771	0.857711	0.737313	1.14428
ILMN_1731941	APOM	1.37313	1.11642	1.2398	1.06169	1.37711	1.04677	1.4995	1.07861	1.1791	1.19204	1.12239	1.11343	1.21592	1.03383	1.17612	1.4607
ILMN_1721623	APOO	1.46766	1.13532	1.12736	1.23383	1.29552	1.36617	1.81294	1.35025	1.18806	1.25274	1.11642	1.35622	1.22687	1.22587	1.199	1.67562
ILMN_1777483	APOOL	1.25771	0.983085	0.99005	1.06667	1.07264	1.05075	1.53632	1.12836	1.0199	0.962189	0.907463	0.999005	1.05771	0.936318	0.971144	1.54527
ILMN_2404065	APP	3.41692	1.61493	1.801	2.86368	2.57413	3.35124	1.98507	1.85771	2.66468	3.92637	1.71443	3.67264	3.4597	2.46368	2.82587	1.95025
ILMN_1653283	APP	0.944279	0.835821	0.921393	0.99801	0.99602	0.877612	1.46468	0.922388	0.853731	0.920398	0.833831	0.839801	0.977114	0.929353	0.834826	1.25771
ILMN_2404063	APP	4.91542	2.34229	2.18706	2.83682	3.70149	3.65075	2.67463	2.72537	3.42488	4.67761	2.10647	3.88756	3.84179	3.05473	3.69851	2.18905
ILMN_2149766	APPBP2	3.43682	2.51045	2.25672	4.01891	2.5194	3.32836	3.65075	2.99502	3.16716	2.43881	2.54627	5.25373	2.89652	3.13134	3.42289	3.9403
ILMN_1763730	APPL1	2.09154	1.86169	1.28358	1.79801	1.57811	1.67562	2.82985	1.88756	1.69055	1.55522	1.38706	1.98408	1.52637	1.67463	1.69254	2.37114
ILMN_1765076	APPL2	4.47363	3.10647	2.54527	3.07861	3.10249	3.69751	4.28358	3.57313	3.82587	2.02189	3.7801	6.80398	3.10647	3.48756	3.38408	4.36318
ILMN_1722491	APRT	16.5761	13.1274	5.90647	11.2965	13.9791	11.1512	11.5164	11.3025	13.9463	9.05174	8.199	12.3731	12.0836	11.7134	11.003	11.1035
ILMN_1726410	APRT	8.97313	7.00199	3.33333	6.55224	6.87662	6.64179	5.99502	6.14129	7.71244	4.59602	4.34527	6.68657	6.13632	5.9403	5.86766	5.42687
ILMN_2317348	APTX	3.09652	2.7602	1.60498	2.67363	2.64876	2.76517	3.20995	3.28259	3.6398	2.05871	2.47164	3.89851	3.07164	2.96418	2.9592	2.95323
ILMN_2260058	APTX	0.922388	0.906468	0.963184	0.878607	0.927363	0.975124	1.10348	0.852736	0.78408	0.810945	0.781095	0.890547	0.78806	0.833831	0.806965	0.970149
ILMN_1726752	APTX	2.18905	2.07164	1.13731	1.69751	1.95124	1.99303	2.73831	2.13433	2.08159	1.59801	1.54826	2.27065	1.65473	2.20199	1.6408	2.52239
ILMN_1776857	AQP1	1.10746	1.05572	1.01592	1.21294	1.03483	1.04577	2.67861	1.0209	1.15323	1.10647	0.962189	1.03781	1.1005	0.98806	0.98209	1.81393
ILMN_1681103	AQP1	1.0597	0.953234	1.08657	0.989055	1.11244	1.07164	1.25771	1.04876	0.937313	0.974129	0.835821	1.0806	0.944279	1.06269	1.04876	1.24876
ILMN_2090004	AQP10	1.70348	3.71443	1.47065	1.4199	1.69652	2.10945	1.76119	5.92139	3.23781	3.0607	1.47562	1.88358	1.65572	1.41294	1.83383	2.51443
ILMN_1762606	AQP11	0.878607	0.870647	0.865672	0.892537	0.849751	0.935323	1.15224	0.848756	0.866667	0.869652	0.732338	0.981095	0.79801	0.954229	0.822886	1.0607
ILMN_1757036	AQP12A	1.40697	1.2597	1.29353	1.21592	1.19602	1.3592	1.47065	1.36617	1.199	1.19801	1.08856	1.34229	1.02985	1.19005	1.199	1.5393
ILMN_1732149	AQP2	1.09453	0.949254	0.901493	0.893532	1.11642	1.04378	1.2597	1.02289	0.930348	1.02388	0.853731	0.989055	0.864677	0.979104	1.001	1.16418
ILMN_1651574	AQP3	1.1204	1.09751	0.951244	0.948259	0.940299	0.966169	2.83383	0.888557	0.978109	0.921393	0.808955	0.872637	0.829851	0.848756	0.976119	2.15323
ILMN_1676649	AQP4	0.881592	0.99403	0.928358	0.99005	1.12836	0.929353	1.47861	0.956219	0.849751	0.958209	0.947264	0.949254	1.00796	0.79403	0.80796	1.4806
ILMN_1747683	AQP4	0.785075	0.877612	0.868657	0.841791	0.944279	0.915423	1.27861	0.886567	0.81791	0.860697	0.767164	0.840796	0.768159	0.743284	0.847761	1.07065
ILMN_1807036	AQP5	0.918408	0.908458	0.957214	0.945274	0.924378	0.932338	1.24179	0.849751	0.885572	0.857711	0.849751	0.79204	0.836816	0.862687	0.863682	1.12637
ILMN_1786381	AQP6	1.13134	0.99204	0.934328	1.2	0.972139	1.13134	1.56418	1.10547	1.10647	1.00299	0.879602	1.01592	0.941294	0.975124	1.02687	1.57512
ILMN_1738494	AQP7	0.895522	1.01194	0.941294	0.934328	0.895522	0.918408	1.45373	0.863682	0.927363	0.939303	0.99005	0.941294	0.859701	0.886567	0.872637	1.23383
ILMN_2053902	AQP7P2	1.21294	0.900498	0.841791	0.985075	0.934328	0.876617	2.34826	0.885572	0.849751	0.820896	0.880597	0.959204	0.852736	0.995025	0.81393	2.05871
ILMN_1713462	AQP8	0.924378	0.931343	0.877612	0.924378	0.943284	0.883582	1.27761	0.888557	0.889552	0.8	0.799005	0.7801	0.860697	0.835821	0.861692	1.23582
ILMN_1715068	AQP9	110.877	75.807	66.8776	81.8189	59.0607	128.888	104.849	48.805	64.4587	93.2229	104.533	211.174	66.1453	132.329	80.7284	105.613
ILMN_2177460	AQR	1.03881	0.912438	0.853731	1.09453	1.07861	1.00697	1.47164	1.01891	1.04279	0.98607	0.942289	1.38408	0.937313	0.98408	0.975124	1.16517
ILMN_1767351	AR	1.09353	1.03284	0.965174	1.00796	1.06965	0.914428	2.43383	0.925373	1.09453	0.887562	0.829851	1.02886	0.849751	1.03781	1.09353	1.73532
ILMN_1659572	AR	0.99005	0.867662	0.8199	0.906468	0.859701	0.902488	1.13731	0.866667	0.847761	0.816915	0.881592	0.936318	0.774129	0.810945	0.765174	1.19303
ILMN_1792540	AR	0.929353	0.827861	0.848756	0.964179	0.921393	0.883582	1.4398	0.829851	0.902488	0.877612	0.748259	0.880597	0.836816	0.900498	0.779104	1.18308
ILMN_1658883	ARAF	8.83383	8.19701	6.201	10.4	6.93134	10.5443	7.22289	7.6398	7.94129	6.92239	7.89851	12.1124	7.94328	7.96915	7.61592	8.20199
ILMN_1711120	ARC	1.09751	1.07463	1.14328	0.946269	1.05871	0.934328	1.51045	1.0597	1.14229	0.979104	1.0607	1.11741	1.09453	0.975124	1.0607	1.20597
ILMN_1699703	ARCN1	11.7811	10.1871	6.38806	10.4398	8.84876	8.75821	10.2856	9.34428	10.8507	8.23483	11.2149	23.207	8.82587	11.9333	9.43682	9.96418
ILMN_1721977	ARD1A	5.18607	4.41791	3.25473	4.82587	3.88358	4.64876	6.07662	4.60398	5.12637	3.82587	3.98209	5.37512	3.87761	3.78507	3.80697	5.54328
ILMN_1804421	AREG	0.99204	1.01194	0.971144	0.908458	0.977114	0.825871	1.16219	0.906468	0.812935	0.899502	0.80995	0.956219	0.864677	1.00199	0.879602	1.08756
ILMN_2330948	ARF1	2.59204	2.38209	2.19602	2.6597	1.87761	2.68259	2.86269	2.37313	2.15821	2.64776	2.03085	3.50448	1.7602	2.37214	2.15124	2.81692
ILMN_1802203	ARF1	28.0716	21.2975	23.3085	24.8896	18.793	30.0527	22.4567	19.6358	22.993	28.5552	22.5891	44.8776	18.3502	23.8229	22.5522	22.0796
ILMN_1661458	ARF1	1.16219	1.11045	0.975124	1.04279	1.21592	1.02289	2.50945	0.903483	1.09055	0.987065	0.927363	0.967164	0.925373	1.00896	1.00199	2.36716
ILMN_1682938	ARF3	9.69552	8.30348	5.11343	6.22388	6.55821	6.01692	7.85473	7.26766	8.08458	6.96219	7.11144	12.1811	5.57512	9.72438	6.27363	7.14428
ILMN_1723884	ARF4	2.68358	1.49254	1.74328	2.51443	1.72935	3.34527	2.50249	1.44378	1.78209	2.55423	1.14826	3.21194	2.1791	1.70249	1.5403	2.10746
ILMN_1719518	ARF4	10.7204	6.8199	6.25274	8.91542	6.97512	9.95323	12.7801	7.73532	7.97711	7.2597	7.24378	17.4985	7.601	9.04577	6.77114	10.6607
ILMN_1752340	ARF5	20.9542	21.3403	10.9055	14.9154	15.0657	14.0527	13.9294	17.0806	20.4547	14.1025	15.7871	16.805	12.9124	18.4448	14.6677	12.9831
ILMN_1764297	ARF6	1.08557	1.07363	0.957214	1.04876	1.13333	1.0398	2.61294	0.98607	0.971144	0.938308	0.79005	0.98607	0.878607	0.922388	0.829851	1.98806
ILMN_2406873	ARFGAP1	1.12239	1.03085	0.928358	1	1.17015	0.983085	1.50647	1.11642	0.931343	0.952239	0.951244	1.04378	0.927363	0.933333	0.930348	1.38607
ILMN_1675709	ARFGAP1	2.87264	3.55423	1.64677	2.99303	2.70846	2.53234	3.24577	4.06269	4.20299	1.71144	3.63383	3.51045	2.10249	2.48856	2.87065	2.85274
ILMN_1769250	ARFGAP2	4.61493	5.2796	3.01692	4.89154	3.81692	4.87065	4.20896	4.05473	4.63483	3.38408	4.50448	6.55323	3.10448	4.04975	4.25572	4.15721
ILMN_2227800	ARFGAP3	0.957214	1.0199	0.840796	0.889552	0.947264	0.936318	1.44279	0.935323	0.885572	0.870647	0.804975	0.899502	0.808955	0.929353	0.880597	1.36219
ILMN_2221408	ARFGEF1	1.95423	1.43383	1.15522	1.95423	1.50348	1.91542	1.99801	1.68756	1.78507	1.52935	1.57612	2.5602	1.40896	1.96816	1.68358	2.17811
ILMN_1789990	ARFGEF2	1.19701	0.989055	0.972139	1.11443	0.98806	1.27761	1.33532	1.09751	1.09453	1.06169	0.947264	1.2398	0.934328	0.978109	0.931343	1.26269
ILMN_2403906	ARFIP1	4.92736	2.86766	3.61692	5.56816	3.55821	5.04279	5.20199	4.08458	3.93433	4.05473	3.64876	10.4289	4.41791	5.67363	3.05075	4.41095
ILMN_1768399	ARFIP1	1.2398	1.09552	1.18806	1.35821	1.06368	1.46468	1.36915	0.933333	0.960199	1.00299	0.905473	1.11741	0.966169	1.06866	0.900498	1.30448
ILMN_1750690	ARFIP2	1.09353	0.930348	0.850746	1.00398	1.02985	0.904478	2.64776	0.897512	0.896517	0.913433	0.744279	1.08557	0.812935	0.964179	0.914428	2.44975
ILMN_1703989	ARFRP1	1.56119	1.56418	1.22587	1.41891	1.33632	1.199	1.82786	1.4995	1.7592	1.2398	1.36816	1.55721	1.38308	1.33731	1.51144	1.89254
ILMN_1812281	ARG1	1.34627	1.54328	1.23582	1.44776	1.29453	2.82886	1.92537	1.57114	2.4209	1.9393	1.51443	4.17413	1.26468	1.55224	3.18607	2.38806
ILMN_1800898	ARG2	1.201	1.0995	1.13035	1.13532	1.2209	1.03881	1.79303	1.42985	1.29154	1.09154	0.997015	1.60995	0.985075	1.4199	1.05572	1.63383
ILMN_1716068	ARGFX	0.879602	0.905473	0.895522	0.730348	0.897512	0.81393	1.24378	0.826866	0.918408	0.889552	0.804975	0.855721	0.783085	0.833831	0.898507	1.08259
ILMN_2095571	ARGFXP2	1.03184	0.833831	0.919403	0.906468	0.934328	0.905473	1.24478	0.858706	0.910448	0.827861	0.829851	0.852736	0.839801	0.840796	0.867662	1.0607
ILMN_1788468	ARGLU1	19.9114	13.0945	8.52239	30.8786	14.1672	26.5642	21.2109	23.6169	22.19	10.5025	20.7095	39.4955	16.008	15.9015	19.3313	20.7781
ILMN_1732060	ARHGAP1	20.0995	17.1224	10.3104	14.8985	15.8159	20.0687	15.4577	13.3164	15.5871	13.6806	16.601	24.5224	12.8866	15.9652	13.1711	14.8308
ILMN_1736112	ARHGAP10	2.43284	1.89055	1.5592	1.86766	2.47363	1.76816	2.75721	2.23085	2.65274	1.83781	1.52537	2.07363	1.82388	2.21194	1.72537	2.62587
ILMN_1673815	ARHGAP11A	2.12836	1.74627	1.55224	2.04279	1.71841	1.66866	2.59005	1.98507	1.98806	1.89055	1.65075	2.43582	1.61095	2.06965	1.85174	2.09154
ILMN_1744830	ARHGAP11A	1.03781	1.05075	0.874627	0.960199	0.958209	1.02587	1.22886	0.914428	0.991045	0.985075	0.861692	1.01791	0.949254	1.06766	0.929353	1.09851
ILMN_2395913	ARHGAP11A	1.33532	1.19502	1.10249	1.12438	1.19602	1.17413	1.56915	1.39801	1.08756	1.04577	1.0607	1.28856	0.985075	1.13532	1.14925	1.44577
ILMN_2215881	ARHGAP11B	1.04279	1.09751	0.98209	1.09453	1.0607	1.03682	1.33333	1.00498	1.17214	1.17811	0.963184	1.04279	1.00796	1.12836	0.920398	1.15423
ILMN_2101810	ARHGAP12	1.07861	1.12537	0.900498	1.14428	0.936318	1.0607	1.4408	1.00597	0.99602	0.944279	0.969154	1.3194	1.04975	1.03781	1.09055	1.48756
ILMN_2208413	ARHGAP15	28.1851	19.4955	11.8	17.4159	18.8597	19.5711	25.807	18.3373	21.1433	20.603	24.4905	43.1174	21.1244	23.9294	20.1562	26.1891
ILMN_1718610	ARHGAP17	13.1373	9.74328	5.26567	16.0657	8.28955	14.81	10.1522	11.1791	11.2129	8.82488	8.30945	18.2388	11.2796	10.5612	8.88259	9.5005
ILMN_2398847	ARHGAP17	2.90348	2.05274	1.53632	2.82587	2.04279	2.24975	2.8607	2.48955	2.55622	1.9204	1.90647	2.8607	1.97313	2.12637	2.0796	2.33632
ILMN_1756693	ARHGAP17	0.98408	0.894527	0.965174	0.98806	1.01393	0.969154	1.06567	1.02488	0.912438	0.991045	0.877612	1.07065	1.01493	0.924378	1.06269	1.14527
ILMN_1791186	ARHGAP18	0.999005	1.07463	0.944279	0.931343	0.970149	1.15622	1.33333	0.976119	1	0.862687	0.873632	0.99801	0.800995	0.899502	0.952239	1.33035
ILMN_1688953	ARHGAP19	6.19303	5.56517	3.68458	3.21692	4.27164	4.8806	4.08159	5.0607	5.98408	4.04179	6.03085	9.89652	4.10448	6.06169	4.40796	4.63781
ILMN_1782761	ARHGAP20	0.928358	1.02488	0.964179	0.875622	0.892537	0.960199	1.18209	1.03184	0.925373	0.913433	0.777114	0.942289	0.899502	0.905473	0.868657	1.13731
ILMN_1811592	ARHGAP21	4.54726	4.21493	2.55124	4.36915	3.99005	4.05572	5.67562	5.43781	4.75224	3.88458	3.22587	6.46965	3.48856	4.10348	3.95124	6.84279
ILMN_1676361	ARHGAP22	1.05075	1.01194	0.967164	1.07363	1.11741	1.07264	1.2	1.06169	1.23582	1.04478	1.00796	1.32935	0.965174	1.05473	1.13831	1.2
ILMN_1775441	ARHGAP24	1.14129	1.09254	1.05672	1.04677	0.98806	1.12239	1.3801	1.13532	1.11542	1.13731	0.953234	1.30249	0.909453	1.03284	1.07463	1.15522
ILMN_2352633	ARHGAP24	1.11841	0.923383	0.939303	1.10846	1.04876	1.07264	1.48557	1.08856	0.890547	0.966169	0.907463	1.32139	0.99602	1.13632	1.05871	1.29652
ILMN_1765876	ARHGAP24	1.07463	0.900498	1.00697	1.50746	1.0607	1.37015	1.68657	1.25672	0.99005	1.04975	1.09453	1.2199	0.991045	0.881592	1.20199	1.60995
ILMN_1801833	ARHGAP24	1.80498	1.57612	1.58109	1.89453	1.41294	2.07363	1.91045	1.7204	1.84378	1.68358	1.56915	2.39204	1.55721	1.86766	1.89055	1.99602
ILMN_1658853	ARHGAP25	1.16617	0.878607	1.02985	1.19005	1.03184	1.53632	1.03085	1.07264	0.918408	1.03184	0.99005	1.01891	1.07861	0.981095	1.09851	1.10647
ILMN_1777998	ARHGAP25	39.1821	28.6965	20.9174	26.397	27.6498	32.6716	32.2398	23.6687	29.1542	24.0249	33.3264	63.0527	26.0706	38.6129	26.9682	31.6806
ILMN_1661971	ARHGAP25	1.08756	0.942289	1.10149	0.885572	0.962189	1.08159	1.65672	0.914428	0.987065	0.953234	0.884577	0.869652	0.953234	0.909453	0.865672	1.31642
ILMN_1711490	ARHGAP26	2.14229	2.38806	1.399	1.83881	1.68756	1.4796	2.09254	1.79701	1.96617	1.93134	2.5393	3.72836	1.22886	2.36617	1.79303	1.96517
ILMN_2103362	ARHGAP27	1.32239	1.29254	1.13333	1.53831	1.27463	1.46667	1.52637	1.32139	1.41393	1.09751	1.37313	2.03085	1.02786	1.05771	1.2408	1.50149
ILMN_1731178	ARHGAP28	0.947264	0.902488	0.800995	0.78806	0.827861	0.81194	1.201	0.881592	0.830846	0.855721	0.853731	0.894527	0.747264	0.929353	0.760199	1.12637
ILMN_2290204	ARHGAP28	1.00796	0.854726	0.922388	0.81791	0.80199	0.985075	1.599	0.825871	0.885572	0.81194	0.863682	0.841791	0.885572	0.932338	0.9801	1.28657
ILMN_1797753	ARHGAP28	0.98806	0.968159	0.876617	0.891542	0.956219	0.981095	1.30846	0.985075	0.928358	0.941294	0.827861	0.942289	0.890547	0.916418	0.935323	1.08856
ILMN_1751474	ARHGAP29	0.977114	0.967164	0.836816	0.921393	0.951244	0.857711	1.26667	0.895522	0.822886	0.873632	0.78408	0.863682	0.833831	0.853731	0.910448	1.11144
ILMN_2408851	ARHGAP30	19.7353	20.5761	12.4826	20.0687	13.9771	19.6587	16.1861	17.5284	20.0468	14.0915	28.009	45.1234	13.2299	18.791	14.0418	15.5871
ILMN_1750805	ARHGAP30	39.4488	37.1662	28.8517	38.1801	29.1701	34.1731	32.6657	35.0299	35.7841	29.8219	48.0667	68.6776	28.3761	38.6816	31.8816	38.3662
ILMN_1751164	ARHGAP30	5.55522	3.48657	5.13532	7.15423	3.91443	8.09751	2.77711	3.74726	4.23184	5.88259	5.84776	14.6468	4.47264	4.24179	5.15622	2.35025
ILMN_1770824	ARHGAP4	21.599	22.0995	12.5144	26.7284	18.8129	22.5294	23.807	24.1373	29.5373	15.1363	30.8428	34.6418	17.5214	15.9771	22.4328	26.0786
ILMN_2322747	ARHGAP5	1.21891	1.01692	1.12736	1.08458	0.989055	1.00299	1.63582	1.08856	1.10945	0.967164	0.859701	0.931343	0.933333	1.14229	0.966169	1.58905
ILMN_2388746	ARHGAP6	0.968159	0.915423	0.985075	0.932338	0.958209	0.977114	1.33731	1.00199	0.98806	1.01493	0.98408	1.00398	0.917413	1	0.973134	1.2597
ILMN_1673358	ARHGAP6	0.869652	0.904478	0.888557	0.907463	0.871642	0.889552	1.37214	0.80597	0.802985	0.769154	0.741294	0.915423	0.826866	0.919403	0.78209	1.27164
ILMN_1732641	ARHGAP6	0.877612	0.898507	0.901493	0.896517	0.857711	0.872637	1.0607	0.937313	0.947264	0.954229	0.755224	0.902488	0.832836	0.895522	0.897512	0.985075
ILMN_1806655	ARHGAP6	0.975124	0.875622	0.960199	1.05572	0.929353	0.920398	1.24776	0.967164	0.973134	0.907463	0.824876	0.836816	0.889552	0.891542	0.933333	1.19204
ILMN_2342851	ARHGAP8	1.05174	0.893532	0.940299	0.915423	0.976119	1.02388	1.07761	0.966169	1.02388	1.08657	0.941294	0.987065	0.935323	1.05572	0.893532	1.19104
ILMN_2412475	ARHGAP8	0.99403	0.912438	0.835821	0.941294	0.907463	0.846766	1.25174	0.870647	0.902488	0.898507	0.827861	0.898507	0.764179	0.822886	1.00597	1.36915
ILMN_2297096	ARHGAP8	0.929353	0.904478	0.966169	1.00199	0.847761	0.900498	1.32537	0.944279	0.948259	0.857711	0.747264	0.827861	0.8199	0.865672	0.885572	1.12736
ILMN_1663916	ARHGAP9	52.2826	48.2677	31.5652	52.8836	37.2945	57.8627	73.8567	41.0498	44.5891	44.3652	74.8418	109.359	32.2269	51.5114	41.3502	82.8189
ILMN_2382657	ARHGAP9	18.6418	15.002	10.3781	16.2348	12.5453	18.3473	10.5891	10.8995	12.7353	15.1612	22.0945	39.1751	11.1493	16.5294	13.7771	12.8269
ILMN_1734742	ARHGDIA	14.9144	14.9542	6.21294	8.60199	11.393	11.7393	14.9443	12.1672	14.7045	9.49652	11.9244	13.3005	10.6249	12.2289	9.42488	15.0358
ILMN_1678143	ARHGDIB	460.672	285.142	242.593	309.815	309.478	348.737	460.428	307.474	337.805	289.084	291.687	533.845	280.538	386.258	319.824	405.655
ILMN_2049274	ARHGDIG	1.00597	1.0607	0.958209	1.05672	1.02587	1.01791	1.29851	1.01692	1.02189	0.954229	0.950249	0.995025	0.852736	0.999005	0.929353	1.12338
ILMN_1772370	ARHGEF1	6.45871	8.49751	3.23383	5.7393	5.83085	4.14229	4.81194	8.70547	7.65672	4.72736	8.60597	8.40697	4.05174	5.43881	5.92736	5.17512
ILMN_2293131	ARHGEF1	1.14129	0.989055	0.934328	1.03881	0.963184	1.10647	1.60796	1.08458	1.02488	0.993035	0.777114	1.04876	0.993035	0.933333	0.972139	1.34428
ILMN_2405129	ARHGEF1	3.11244	3.19104	1.87463	2.84776	2.72139	2.33134	2.78706	2.72537	3.43881	1.87164	3.37313	3.67363	2.04975	2.46965	2.77711	2.88458
ILMN_2132809	ARHGEF10	1.20299	1.14328	1.00896	1.13333	1.13532	1.37015	1.22189	1.30249	1.15821	1.08955	1.0995	1.20995	1.0796	0.99403	1.14726	1.53333
ILMN_1727205	ARHGEF10L	1.0199	0.98806	1.11741	1.09453	1.04975	1.06169	2.5194	0.960199	1.07065	1.05871	0.933333	1.18109	0.921393	1.11343	0.963184	2.28856
ILMN_1689770	ARHGEF10L	1.21294	1.13831	1.03781	1.16617	1.17214	1.07861	2.09055	1.07065	1.12239	1.13731	0.930348	1.13333	0.973134	1.22886	1.25771	1.72836
ILMN_2389445	ARHGEF10L	0.944279	0.899502	0.921393	0.933333	0.945274	0.893532	1.74925	0.825871	0.937313	0.834826	0.860697	0.919403	0.926368	0.864677	0.800995	1.51244
ILMN_1656546	ARHGEF11	0.939303	0.977114	0.959204	0.888557	1.00199	0.824876	1.00299	0.959204	0.8199	0.827861	0.79005	0.959204	0.808955	0.877612	0.906468	1.06169
ILMN_2347380	ARHGEF11	1.5393	1.26269	1.1403	1.42786	1.2398	1.35224	2.46468	1.38209	1.5592	1.32537	1.2995	1.84179	1.29652	1.48955	1.27065	2.11642
ILMN_1733861	ARHGEF11	2.05871	1.67463	1.39801	1.92935	1.54925	1.73632	2.23881	1.50647	1.91642	1.58308	1.63881	2.29652	1.57811	1.999	1.48955	2.01493
ILMN_1810712	ARHGEF12	1.1592	1.12836	1.29154	1.15821	1.14129	1.33831	1.98209	1.401	1.90448	1.09055	0.977114	1.75323	0.901493	1.02786	1.21194	2.01393
ILMN_1792571	ARHGEF15	1.16816	1.12935	0.951244	1.07861	0.995025	0.987065	1.85672	1.08657	1.1592	1.01393	0.858706	1.09453	1.02886	1.11642	0.99204	1.53632
ILMN_1669928	ARHGEF16	0.955224	0.972139	0.882587	0.964179	0.872637	0.841791	2.22587	0.851741	1.02786	0.864677	0.725373	0.929353	0.869652	0.867662	0.920398	1.82189
ILMN_1754562	ARHGEF17	1.08657	1.00796	1.07164	1.14726	0.966169	0.956219	1.41393	1.04378	1.09453	0.99403	0.889552	0.98408	0.889552	0.947264	1.03284	1.30746
ILMN_1664016	ARHGEF18	53.3194	41.2488	21.1562	46.406	40.1672	45.8109	35.1761	39.8259	44.4239	29.1035	29.1652	60.3871	38.803	49.3393	35.9473	35.5532
ILMN_1808999	ARHGEF19	1.99104	1.76716	1.28458	2.34328	1.58507	1.56119	2.50149	1.8806	1.92537	1.35821	1.80299	2.38905	1.49552	1.48159	1.6597	1.98507
ILMN_1703477	ARHGEF2	49.006	46.0627	30.1413	38.4975	35.8836	44.3463	50.6567	41.8448	42.4129	37.5005	47.5035	71.198	33.9851	49.8935	39.2199	64.1403
ILMN_1781010	ARHGEF3	28.4378	25.2338	8.77711	29.9711	23.6458	23.6388	31.2706	26.9791	29.3881	17.602	19.8876	35.8965	23.598	26.4667	21.8179	32.994
ILMN_1666076	ARHGEF4	0.882587	0.855721	0.855721	0.898507	0.834826	0.995025	1.10746	0.942289	0.894527	0.831841	0.828856	1.01891	0.877612	0.791045	0.854726	1.17114
ILMN_2342282	ARHGEF4	0.999005	0.979104	0.872637	0.781095	0.939303	0.976119	1.94826	0.873632	0.867662	0.883582	0.743284	0.899502	0.894527	0.973134	0.914428	1.61294
ILMN_1708093	ARHGEF5	1.1791	1.10547	0.893532	0.924378	1.11443	1.03383	1.31144	1.12139	1.12935	0.864677	0.826866	1.16119	0.814925	0.98607	0.938308	1.24677
ILMN_1803423	ARHGEF6	22.4159	15.5204	10.8587	28.7473	19.1592	24.7781	25.0806	24.9761	24.7761	16.7095	17.7174	43.5711	17.3005	20.5632	20.4726	25.007
ILMN_1796912	ARHGEF7	8.30647	6.15423	3.21692	7.19801	5.33234	7.27463	6.86866	6.7393	7.86667	4.48557	6.24577	10.2219	5.79701	5.27861	5.39005	5.99104
ILMN_2235679	ARHGEF7	0.899502	0.847761	0.859701	0.886567	0.853731	0.890547	1.33532	0.834826	0.856716	0.920398	0.851741	0.975124	0.776119	0.856716	0.847761	1.3204
ILMN_1675984	ARHGEF7	1.18209	1.18607	0.99602	1.08458	1.0796	1.00697	1.39801	1.04876	0.961194	1.02488	0.903483	1.07662	1.1602	1.04577	1.05672	1.18209
ILMN_1779370	ARHGEF9	1.06567	1.08358	1.01194	1.03881	1.06866	1.19502	1.27463	1.05075	1.05274	0.962189	1.06866	1.08657	0.937313	1.08358	1.15423	1.17313
ILMN_1734496	ARID1A	1.05871	0.841791	1.03682	1.02687	0.966169	0.907463	1.4796	1.06965	0.940299	0.894527	0.929353	1.01194	0.955224	0.953234	1.00199	1.42189
ILMN_1797341	ARID1A	18.5055	12.2159	10.6517	17.6846	11.9154	24.6547	15.0279	12.9055	13.5413	13.8647	13.8577	33.6776	14.4776	15.5383	13.4299	13.8557
ILMN_2415357	ARID1B	0.831841	0.838806	0.861692	0.840796	0.947264	0.947264	1.18507	1.02985	0.829851	0.930348	0.769154	1.00697	0.848756	0.893532	0.837811	1.15423
ILMN_1660433	ARID1B	0.99403	1.08458	0.918408	0.961194	1.13333	1.09751	1.14328	1.03582	0.964179	0.99602	0.868657	1.07065	0.970149	0.968159	1.08159	1.14627
ILMN_2182335	ARID2	1.52935	1.26269	1.14527	1.5403	1.36517	1.77512	1.91642	1.27264	1.11244	1.10945	1.19303	1.94328	1.27363	1.2607	1.14328	1.83881
ILMN_1670130	ARID3A	14.9811	13.6527	10.1731	10.6149	12.1124	9.9204	13.9323	11.5493	14.2507	13.3851	14.9343	25.6119	9.12637	20.6687	12.0109	14.6826
ILMN_1757626	ARID3C	0.99801	0.98408	0.872637	1.03483	0.955224	0.900498	1.21294	0.862687	0.933333	0.956219	0.944279	0.974129	0.928358	0.852736	0.929353	1.30149
ILMN_2338447	ARID4A	1.31045	1.03085	1.29154	1.83582	1.08657	1.83483	1.34129	1.18806	1.20796	1.24378	1.09055	2.08458	1.40697	1.27861	1.17214	1.07164
ILMN_1676626	ARID4A	1.67761	1.11542	1.41095	1.73731	1.21095	1.79005	1.47264	1.30348	1.39701	1.38706	1.19801	1.93333	1.25871	1.201	1.21493	1.44478
ILMN_1810229	ARID4A	3.2209	1.77413	2.18109	2.85572	2.18806	2.97214	3.5801	2.44975	2.52438	2.31045	2.74229	5.45871	2.6607	2.9791	2.9403	2.83383
ILMN_1761334	ARID4B	1.49552	1.05373	1.26169	1.6	1.18706	1.65572	1.53234	1.12139	1.14527	1.20896	1.03582	1.97711	1.15622	1.25174	1.23781	1.36716
ILMN_2269564	ARID4B	13.5861	9.30348	3.73632	5.72836	8.09254	7.48259	6.11045	9.89055	9.00697	9.08756	6.1005	11.9771	8.47562	15.1851	7.52836	6.3801
ILMN_2362982	ARID4B	5.47662	3.78507	1.94428	2.84179	3.46169	2.63881	2.78209	4.23483	4.83483	3.27861	3.02687	4.3602	2.97711	4.9403	3.6806	3.13433
ILMN_1689700	ARID5A	1.30249	1.20498	1.1393	0.959204	1.25373	1.18806	1.41493	1.23085	1.1403	1.25672	1.16418	1.28259	1.10249	1.12836	1.09851	1.34229
ILMN_2298567	ARID5A	1.10547	1.02985	0.909453	0.965174	1.1204	1.02786	1.0995	1.03284	1.07662	0.958209	0.810945	0.895522	0.993035	1.07463	1.02886	1.06766
ILMN_2415157	ARID5A	2.47065	2.0806	1.61095	1.51045	2.25373	1.80597	1.79502	1.77015	1.7791	2.02189	1.76119	1.91443	1.44677	1.6995	1.83085	1.92338
ILMN_1721626	ARID5B	5.52139	3.21095	2.01891	4.63284	3.05274	3.71343	4.83483	3.84577	3.82488	2.62388	3.35522	7.29254	3.98308	3.53433	3.05473	4.03284
ILMN_1694219	ARIH1	2.29552	1.49254	1.69552	2.34627	1.72637	2.45473	2.201	1.61692	1.55622	1.61493	1.40697	3.19701	1.84179	1.78209	1.43582	1.84677
ILMN_1792825	ARIH2	8.23781	6.44179	4.56816	7.89353	6.82388	8.6806	6.77114	8.9592	9.34328	5.72239	7.34627	12.6597	7.03383	7.49254	9.13134	6.71244
ILMN_1813091	ARL1	2.29751	1.56816	1.29652	2.02886	1.74328	1.41791	2.08856	2.01692	2.12836	1.48358	1.51244	2.53532	1.63682	1.61095	1.76915	1.82786
ILMN_1769168	ARL10	1.0199	0.912438	1.01294	0.962189	1.04179	0.885572	1.41095	0.882587	0.859701	0.842786	0.863682	0.958209	0.860697	1.10348	0.828856	1.17811
ILMN_1808383	ARL11	1.20697	1.10746	0.948259	1.0607	1.12537	1.10249	1.17811	1.04776	1.24478	1.18507	0.957214	1.31542	1.0607	1.18706	1.09353	1.16816
ILMN_1777550	ARL13A	0.871642	0.943284	0.906468	0.931343	1.02587	0.861692	1.40597	0.908458	0.876617	0.850746	0.789055	0.893532	0.887562	0.928358	0.898507	1.1204
ILMN_2403047	ARL13B	1.0597	0.999005	0.878607	0.970149	0.924378	0.948259	1.48856	0.917413	0.995025	0.80796	0.751244	0.959204	0.912438	0.970149	0.940299	1.36716
ILMN_1777301	ARL13B	0.899502	0.884577	0.8	0.859701	0.870647	0.896517	1.07761	0.868657	0.867662	0.847761	0.800995	0.909453	0.863682	0.878607	0.841791	1.04378
ILMN_2232463	ARL14	0.901493	0.897512	0.908458	0.896517	0.879602	0.902488	1.12637	1.02289	0.967164	0.80796	0.80398	1.07363	0.797015	0.802985	0.859701	1.20398
ILMN_2202967	ARL15	1.08259	0.970149	1.08259	0.99005	0.987065	1.03781	1.38706	1.08458	1.02388	0.958209	0.891542	1.17114	0.972139	1.05473	0.978109	1.13632
ILMN_2188119	ARL16	9.34826	8.42786	6.51443	17.8259	8.7791	13.5443	15.6219	17.6249	24.1443	5.81194	12.2279	20.9045	6.80199	8.64478	18.7164	19.1114
ILMN_1787879	ARL2	10.8139	9.99303	4.90945	9.64776	9.13831	9.13433	9.43284	9.7194	9.52139	7.90647	7.49851	11.9124	8.19801	8.07463	8.24179	10.1353
ILMN_1755391	ARL2BP	9.97015	6.98806	4.99602	10.6299	7.33134	11.0478	8.37512	8.00199	10.4109	7.79801	7.85473	14.5393	8.52637	7.48259	7.02886	9.1403
ILMN_1780444	ARL3	1.3194	1.14328	1.17114	1.3403	1.33532	1.40299	1.58209	1.15025	1.17313	1.24279	1.36816	1.72338	1.23284	1.29652	1.199	1.57811
ILMN_1704842	ARL4A	2.23881	1.74328	2.20995	1.63383	2.25871	2.15821	3.30547	1.96318	1.82189	2.73731	1.58109	2.90348	2.73134	2.92637	1.45473	3.76418
ILMN_2369953	ARL4A	0.941294	1.04577	0.853731	0.941294	0.908458	0.904478	1.53234	0.936318	1.08259	0.876617	0.832836	1.08259	0.835821	0.860697	0.898507	1.53234
ILMN_1775405	ARL4A	4.08557	1.8806	1.98109	3.49751	3.59502	2.65572	2.55821	1.94826	4.0796	2.50945	1.71144	12.1244	2.47463	4.01692	2.32239	3.83881
ILMN_1753663	ARL4A	1.07065	1.06667	1.02488	1.06965	1.08159	0.881592	1.50547	0.937313	1.01095	1.01791	0.906468	1.20697	0.930348	0.954229	0.894527	1.2796
ILMN_1743241	ARL4A	1.67264	1.30348	1.15025	1.6209	1.38905	1.37015	2.07761	1.70945	1.89353	1.5194	1.2209	4.12736	1.21891	1.52637	1.49652	2.49552
ILMN_1768391	ARL4C	1.94328	1.64677	1.16517	1.4597	1.58209	1.37711	2.63284	1.43781	1.5791	1.23781	1.27264	1.65075	1.32537	1.40398	1.31443	2.37612
ILMN_1719010	ARL4D	0.98607	0.894527	0.915423	0.959204	0.916418	0.946269	1.44876	0.962189	0.923383	1.03383	0.887562	0.98806	0.937313	0.923383	0.966169	1.20498
ILMN_1771738	ARL5A	1.36119	1.04975	1.18905	1.35025	1.07463	1.40199	1.92836	1.08955	1.26965	1.20597	0.928358	1.28557	1.13134	1.14229	0.985075	1.88458
ILMN_2332558	ARL5A	3.66269	3.04577	1.63881	3.8607	2.7592	3.66468	3.94726	2.73831	3.87662	2.30647	2.2597	5.83781	2.65274	3.4	2.74229	3.88856
ILMN_1688526	ARL5A	23.4716	16.3642	8.7801	24.9751	15.9532	20.594	28.8169	24.2975	28.81	13.7542	13.8697	38.6587	17.3701	21.7194	18.8597	30.8458
ILMN_2120022	ARL5B	1.33831	1.37214	1.05075	1.30746	1.18905	1.41891	1.98209	1.31741	1.14826	0.99005	1.37015	1.61791	1.19701	1.18905	1.14129	1.54925
ILMN_2307266	ARL6	0.873632	0.846766	0.872637	0.849751	0.879602	0.890547	1.11841	0.8199	0.773134	0.946269	0.843781	0.895522	0.80796	0.802985	0.80995	1.15124
ILMN_1703325	ARL6	0.902488	0.923383	0.898507	1.07164	0.883582	0.904478	1.0995	0.863682	0.887562	0.822886	0.859701	0.879602	0.928358	0.851741	0.991045	1.27164
ILMN_1750488	ARL6	0.895522	0.983085	0.9801	0.879602	0.923383	0.895522	1.09353	0.985075	0.851741	0.891542	0.973134	1.01194	0.911443	0.904478	0.81393	1.02587
ILMN_2113362	ARL6IP1	1.19005	1.03881	1.01692	1.09453	1.21095	1.01791	1.37811	1.06468	1.08657	0.936318	1.00299	1.19204	1.05373	1.02786	1.18806	1.3005
ILMN_1791149	ARL6IP4	2.15721	2.59303	1.55423	1.97114	1.8796	1.85572	2.49055	2.04179	2.02189	1.64577	1.60796	2.02786	1.57114	2.41592	1.88259	2.2408
ILMN_1779835	ARL6IP4	1.23781	1.34229	1.1194	1.01791	1.18308	1.12139	1.5403	1.37612	1.27463	0.989055	1.17313	1.199	0.99403	1.05771	1.1403	1.50149
ILMN_2393144	ARL6IP4	4.95124	5.18905	2.31244	3.52438	4.47662	3.37711	5.39602	5.04179	5.33731	3.05771	3.22786	3.80995	2.7592	4.47463	3.70647	5.40498
ILMN_1769810	ARL6IP5	29.9184	23.7294	13.5214	26.8159	20.5393	30.8836	34.2806	30.6945	25.4876	18.8488	15.7085	44.6418	19.7781	27.4726	21.4557	34.4677
ILMN_2117902	ARL6IP6	0.831841	0.893532	0.837811	0.952239	0.896517	0.836816	1.27761	0.80199	0.864677	0.806965	0.739303	0.855721	0.823881	0.840796	0.895522	1.1403
ILMN_1659148	ARL8A	1.16816	1.04577	1.09453	1.01692	1.06468	0.975124	1.94527	1.00796	0.978109	1.00995	0.81194	0.98408	0.987065	0.865672	0.846766	1.91244
ILMN_1752837	ARL8B	6.54229	4.8796	3.49055	6.16617	4.42488	6.60995	6.03682	5.17711	6.11443	3.94726	4.21891	10.608	5.09851	5.69353	5.0209	6.34129
ILMN_1777691	ARL9	1.0408	0.859701	0.81393	0.963184	1.00796	0.977114	1.11244	0.901493	0.98607	0.846766	0.820896	0.959204	0.789055	0.925373	0.81194	1.1592
ILMN_1722066	ARMC1	3.4796	2.53035	1.9005	3.11542	2.56915	2.53234	3.79403	3.64677	3.40299	2.02985	2.01095	3.48955	2.44179	3.01592	2.63781	3.99005
ILMN_2052598	ARMC10	3.95323	2.62488	2.55721	5.26866	2.75423	5.42388	3.37114	2.68955	3.5602	3.28159	2.45274	6.9791	3.38209	3.51741	3.03682	2.83582
ILMN_2213008	ARMC2	0.954229	0.827861	0.897512	0.919403	0.964179	1.00597	1.75622	0.863682	1.00995	0.847761	0.827861	0.902488	0.879602	0.840796	0.821891	1.59204
ILMN_1776395	ARMC4	0.894527	0.843781	0.860697	0.884577	0.893532	1.03881	1.28358	0.958209	0.8199	0.864677	0.808955	0.891542	0.830846	0.890547	0.924378	1.28458
ILMN_1697088	ARMC5	1.14826	1.05075	0.99204	1.04876	1.17413	1.05771	2.07164	1.09652	1.04975	0.821891	0.975124	1.03383	0.903483	0.955224	0.99801	2.12935
ILMN_1697118	ARMC6	1.80597	1.98507	1.48458	1.64279	1.73532	1.54129	2.57512	1.91542	1.75721	1.47264	1.48159	1.93333	1.40995	1.59403	1.42687	2.65572
ILMN_1797298	ARMC7	2.78507	2.51343	1.56617	2.14527	2.15721	2.34925	3.05771	2.27861	3.34328	1.84577	2.28756	3.37612	1.95821	2.40498	2.3204	2.88159
ILMN_1797453	ARMC8	1.10249	1.03781	0.952239	1.25572	1.20299	1.15423	1.24975	1.00199	1.02388	1.05373	1.04677	1.4607	0.987065	0.971144	1.04975	1.26965
ILMN_1781151	ARMC8	2.02289	1.17015	1.74328	2.37612	1.43383	2.61692	1.67164	1.4398	1.83483	1.82587	1.56219	3.52537	1.87463	1.79104	1.52239	1.45672
ILMN_1656557	ARMC8	1.09751	0.99005	1.06965	1.0806	1.01194	0.932338	1.31045	1.01692	1.12836	0.969154	0.866667	1.07761	0.98806	1.0398	0.885572	1.30547
ILMN_2385318	ARMC8	1.12537	0.936318	0.99602	1.03184	0.823881	1.13532	1.13433	1.00697	0.987065	1.06567	0.917413	1.39502	0.906468	0.916418	0.951244	1.2607
ILMN_1755732	ARMC9	1.1592	0.987065	1.00498	0.99403	0.932338	0.964179	2.3592	0.972139	0.939303	0.890547	0.892537	1.02189	0.80597	0.949254	0.927363	1.86567
ILMN_2180677	ARMCX1	0.905473	0.894527	0.991045	0.899502	0.847761	0.98607	0.977114	0.961194	0.894527	0.847761	0.810945	0.885572	0.804975	0.849751	0.7801	1.0806
ILMN_1785170	ARMCX2	1.28756	1.15323	0.919403	1.22687	0.958209	1.47861	1.47363	1.29055	1.24279	1.14627	0.968159	1.67562	1.05174	1.05871	1.18109	1.48259
ILMN_2334760	ARMCX3	1.47264	1.12239	1.31045	1.57413	1.12338	1.3801	1.94328	1.53035	1.61592	1.33632	1.15821	2.20896	1.22289	1.47363	1.3592	1.84279
ILMN_1651741	ARMCX3	1.06766	1.01294	0.963184	1.07761	0.960199	0.991045	1.35423	0.961194	1.02786	1.21393	0.895522	1.09353	0.955224	0.933333	1.02488	1.32239
ILMN_1741156	ARMCX5	1.25174	1.06468	0.903483	1.13134	1.24677	1.30746	1.64577	1.19801	1.2597	1.00697	1.08557	1.44179	1.15522	1.14726	1.1204	1.26667
ILMN_2414533	ARMCX6	3.01095	2.78706	1.91741	2.9791	2.31443	2.59602	3.19602	3.81891	3.38806	2.63184	2.05075	3.23682	2.52239	2.66169	2.63085	2.95224
ILMN_1716026	ARMCX6	3.09851	1.66866	1.87363	3.14229	1.61095	2.76915	2.29353	2.43383	2.73333	2.47264	1.58408	3.29353	2.35622	2.47264	2.15423	2.14129
ILMN_2183510	ARMET	16.8269	13.7741	7.01194	13.1005	13.3602	11.7622	13.4249	13.1881	19.1333	10.1811	9.80597	15.604	11.6159	16.2169	11.5682	12.4806
ILMN_1687291	ARMETL1	1.12139	0.987065	0.927363	0.971144	0.969154	1.05672	1.2	1.07861	1.11244	0.949254	0.79801	0.953234	0.886567	0.933333	1.07761	1.16119
ILMN_2347314	ARNT	1.46368	1.23483	0.951244	1.22786	1.33532	1.10945	2.43085	1.24577	1.24279	1.06169	0.99403	1.64677	1.25373	1.3393	1.11144	1.76318
ILMN_1762582	ARNT	1.16318	1.09254	1.10647	1.08159	1.1204	1.05771	1.23682	1.01791	0.953234	0.906468	0.925373	1.13731	1.0408	1.1403	0.932338	1.32438
ILMN_1718046	ARNT2	1.01095	0.899502	0.831841	0.954229	0.909453	0.889552	1.40398	0.882587	0.879602	0.874627	0.810945	0.78209	0.872637	0.816915	0.928358	1.33433
ILMN_1731476	ARNTL	1.2199	1.19403	1.10945	1.20796	1.20597	1.10547	2.54826	1.13333	1.16219	1.14229	1.05174	1.22388	1.31741	1.20697	1.02587	1.78607
ILMN_2405305	ARNTL	5.4199	3.3194	3.49154	5.09652	3.2408	5.81095	4.6607	3.33831	3.94527	4.62388	4.99303	11.205	4.12239	4.2	3.82687	3.96219
ILMN_1798064	ARNTL2	0.98806	0.922388	0.848756	0.944279	0.977114	1.05373	1.86567	1	0.883582	0.80199	0.8	0.906468	0.878607	0.947264	0.730348	1.35025
ILMN_1759915	ARPC1A	6.2209	4.85871	3.48358	6.35025	4.19303	4.78408	6.02786	5.08358	6.11841	4.03682	5.12537	9.59403	4.26866	4.77015	4.36418	6.39801
ILMN_2085760	ARPC1B	17.1144	7.79602	14.9871	19.1313	10.0448	25.6488	7.08259	7.83383	10.7612	19.2547	10.1711	24.5323	11.5512	9.68756	11.4756	4.99602
ILMN_2255021	ARPC2	1.00697	0.914428	0.879602	0.897512	0.993035	0.963184	1.12438	1.02189	0.868657	0.883582	0.749254	0.873632	0.905473	0.876617	0.855721	1.21791
ILMN_1792489	ARPC2	174.481	143.716	117.851	130.624	139.438	142.197	188.313	145.848	164.778	138.019	144.49	220.873	134.442	181.433	128.463	200.938
ILMN_1810200	ARPC2	1.18109	1.32139	1.36219	1.26567	1.34826	1.47761	1.98209	1.09154	1.25572	1.25572	1.07363	1.09552	1.18706	1.28259	1.199	1.69353
ILMN_1655561	ARPC3	60.4766	32.9224	54.6856	87.8736	41.6269	60.2896	51.3851	33.4856	43.602	61.7642	43.8358	123.757	55.2557	59.6289	47.0547	40.395
ILMN_1803183	ARPC4	0.957214	0.964179	0.926368	0.938308	0.925373	1.00597	1.23781	1.00299	1.01692	0.887562	0.846766	0.967164	0.835821	0.865672	0.934328	1.15124
ILMN_2393763	ARPC4	39.992	28.3075	26.5851	36.3602	28.8547	37.3672	16.7343	20.9562	26.197	33.8408	37.5771	61.5164	30.1612	29.0816	23.0299	13.7602
ILMN_1707336	ARPC4	30.7284	32.9692	20.0498	19.6358	26.0189	22.8398	23.8269	24.3274	25.8776	26.1751	29.2428	39.8905	21.5791	28.2179	19.5463	23.8159
ILMN_1768394	ARPC5	51.3522	33.6627	31.0448	38.8985	31.7383	45.5453	49.8786	37.9443	42.1891	36.5642	35.7751	66.3363	32.6945	47.3393	35.1662	50.9005
ILMN_2043816	ARPC5L	5.89154	5.43781	2.25274	4.7403	5.13532	4.54129	4.55124	5.90647	6.79204	3.83682	5.0199	6.21393	4.93035	6.19801	4.57711	5.57413
ILMN_1782810	ARPM1	1	0.848756	0.846766	0.892537	0.8199	0.963184	1.79303	0.913433	0.81791	0.983085	0.847761	0.901493	0.892537	0.915423	0.887562	1.75124
ILMN_1776442	ARPM2	1.02985	0.905473	1.05672	0.936318	0.98607	0.98607	1.1602	0.971144	0.963184	0.930348	0.936318	0.948259	0.882587	0.843781	0.951244	1.21891
ILMN_2059505	ARPP-19	4.25373	2.69652	2.24876	3.82587	2.92637	4.00299	3.94428	3.34428	3.22189	2.5801	2.36517	4.87861	2.66567	3.2209	2.60796	3.96617
ILMN_2289825	ARPP-21	0.989055	0.881592	0.853731	0.897512	0.931343	0.98209	1.21692	0.953234	0.882587	0.899502	0.836816	0.939303	0.725373	0.903483	0.903483	1.17413
ILMN_2251505	ARPP-21	0.923383	1.00199	0.827861	0.945274	1.05274	0.933333	1.28955	0.889552	0.843781	0.824876	0.756219	0.826866	0.99602	1.10348	0.967164	1.01493
ILMN_2374728	ARPP-21	1.00697	0.763184	0.867662	0.877612	0.848756	0.841791	1.40199	0.941294	0.861692	0.840796	0.828856	0.829851	0.834826	0.810945	0.741294	1.23682
ILMN_1671402	ARPP-21	0.99602	0.889552	0.836816	0.897512	0.925373	0.898507	1.12239	0.917413	0.884577	0.935323	0.742289	0.875622	0.81194	0.823881	0.852736	1.34328
ILMN_1660126	ARR3	0.923383	0.860697	0.939303	0.850746	0.945274	0.869652	1.19502	0.893532	1.11542	0.929353	0.893532	0.931343	0.901493	0.856716	0.904478	1.04677
ILMN_2325168	ARRB1	5.79303	5.74826	3.01095	5.47264	4.84975	4.88259	5.81294	5.43682	5.68756	5.59005	4.37114	7.00299	4.72438	6.4796	4.57811	5.78905
ILMN_1730620	ARRB1	4.47264	4.76119	2.80199	4.12935	4.48955	4.67562	4.87065	5.17413	5.56617	4.11741	3.23184	6.16915	4.1194	5.33831	3.79303	4.88557
ILMN_1675866	ARRB2	1.31045	1.27264	1.199	1.28856	1.27264	1.15224	2.1194	1.08458	1.16517	1.20796	0.910448	1.15821	0.864677	1.05771	1.03184	1.74129
ILMN_2395711	ARRB2	6.66866	6.15124	4.42985	5.28955	6.0209	6.63085	4.21095	4.68458	4.95821	6.43184	5.10647	8.05771	5.26269	6.39602	4.90348	4.47164
ILMN_1661492	ARRDC1	1.80697	1.599	1.39204	1.97512	1.80995	1.91343	1.6398	1.65373	1.74925	1.5403	1.57612	2.37413	1.4209	1.61493	1.84876	1.55124
ILMN_1710229	ARRDC2	1.17711	0.978109	0.904478	0.903483	0.963184	0.942289	1.84279	1.06269	1.09254	0.882587	0.746269	0.973134	0.861692	0.972139	0.888557	1.78109
ILMN_1715181	ARRDC2	0.983085	0.901493	1.00199	1.09055	0.921393	1.12537	1.10846	0.945274	1.03483	0.831841	0.914428	1.25572	0.993035	0.849751	1.1194	1.14428
ILMN_1655612	ARRDC2	3.37612	3.94129	2.10547	4.52537	3.46766	3.02786	5.13035	4.16418	5.16318	2.29154	3.91841	5.40995	2.16617	2.65871	3.41095	4.51244
ILMN_2198515	ARRDC3	3.50448	1.62587	2.62886	5.39801	1.94826	5.10547	2.68557	1.81592	2.00398	2.68756	1.98507	6.24179	3.24975	2.49154	2.20199	2.23582
ILMN_2184064	ARRDC4	1.62488	1.4806	1.14229	1.48955	1.47463	1.1393	1.87264	1.42289	1.5005	1.27861	1.15224	3.30647	1.01791	1.39801	0.99204	1.72438
ILMN_2153787	ARRDC5	1.96418	1.7194	1.42289	2.65473	2.2209	2.32139	2.00398	2.67662	2.45871	1.41692	2.12935	2.55224	1.69552	1.53632	2.80597	1.96318
ILMN_2358202	ARS2	19.2687	17.7433	9.50149	24.3005	15.6279	20.993	15.9502	18.4736	22.1572	13.2358	17.1493	31.6796	17.9463	14.801	19.0458	16.0816
ILMN_1733295	ARS2	0.937313	0.983085	0.868657	0.969154	0.99204	0.933333	1.47164	0.954229	0.971144	0.858706	0.910448	0.956219	0.923383	0.965174	0.945274	1.26667
ILMN_2047240	ARSA	2.47363	2.03483	2.00398	2.35124	1.71244	1.84677	3.14726	1.4199	2.39502	1.79502	2.0995	2.83881	1.67164	2.11542	1.52239	2.72736
ILMN_1668727	ARSB	0.865672	0.855721	0.823881	1.02289	0.879602	0.821891	1.08259	0.958209	0.943284	0.883582	0.690547	0.921393	0.79602	0.829851	0.876617	1.18706
ILMN_2242937	ARSB	2.10348	1.30348	1.31244	1.59602	1.52736	1.7791	3.04179	1.55622	1.67861	1.11045	0.995025	2.05473	1.66667	1.61493	1.34229	2.45174
ILMN_1722045	ARSB	1.09851	0.99403	0.900498	1.26965	1.04279	1.15224	1.4806	1.1801	1.05274	1.15124	0.853731	1.26866	1.00697	0.941294	0.967164	1.26567
ILMN_1684956	ARSD	1.07662	0.942289	1.02388	1.20498	1.02786	1.02189	1.41891	0.932338	1.20199	1.13632	0.886567	1.09353	1.22488	0.887562	1.16119	1.22886
ILMN_1661624	ARSD	1.22189	1.09851	1.23682	1.15423	1.25672	1.19701	1.50348	1.18109	1.1791	1.1005	0.922388	0.954229	1.16617	1.3005	1.11443	1.41393
ILMN_1684873	ARSD	2.88955	3.16716	1.57612	2.84677	2.55821	2.51542	3.41095	2.41692	2.03184	1.9791	2.92239	2.66766	2.37313	2.97512	1.98109	3.10149
ILMN_1727462	ARSE	0.889552	0.881592	0.914428	0.877612	1.00299	0.844776	1.30448	0.885572	0.846766	0.854726	0.773134	0.80796	0.842786	0.769154	0.850746	1.26667
ILMN_1664001	ARSF	0.898507	0.914428	0.99801	0.889552	0.862687	0.835821	1.10547	0.917413	0.857711	0.862687	0.850746	0.845771	0.866667	0.950249	0.897512	1.08458
ILMN_1720604	ARSG	2.48259	1.99204	2.12836	2.33532	2.15025	2.58706	2.81592	2.02189	2.1592	2.21891	2.48458	3.14428	2.18408	2.4796	2.01194	2.71841
ILMN_1757896	ARSH	0.882587	0.890547	0.928358	0.856716	0.940299	0.865672	1.25075	0.889552	0.969154	0.931343	0.895522	1.00199	0.849751	0.971144	0.925373	1.14826
ILMN_1727156	ARSI	0.867662	0.840796	0.928358	0.99403	0.931343	0.918408	1.30249	0.925373	0.972139	0.843781	0.7801	1.06368	0.778109	0.902488	0.840796	1.24677
ILMN_1679318	ARSJ	1.00199	0.99005	0.860697	0.981095	1.05572	0.977114	1.23383	0.848756	0.858706	0.971144	0.848756	0.920398	0.951244	0.935323	0.940299	1.2796
ILMN_1657050	ARSK	1.18507	1.08657	1.15025	1.08557	1.0408	1.09652	1.26468	1.1403	1.11045	1.04577	1.04776	1.44279	1.07264	0.99204	1.06965	1.13731
ILMN_1807913	ART1	1.35522	1.09154	1.10945	1.03781	1.24378	1.18607	2.25572	1.21592	1.22687	1.16219	0.890547	0.971144	0.958209	1.13532	0.905473	1.57413
ILMN_1693218	ART3	0.919403	0.991045	0.940299	0.918408	0.955224	1.01095	1.32836	0.930348	0.884577	1.01891	0.843781	0.851741	0.78607	0.764179	0.911443	1.22687
ILMN_1805773	ART4	1.21692	1.20697	1.12239	1.20896	1.22786	1.13831	1.43284	1.21592	1.21791	1.27761	1.18408	1.40199	1.06567	1.15622	1.08657	1.60796
ILMN_1733583	ART5	0.934328	0.860697	0.878607	0.912438	0.941294	0.773134	0.99602	0.888557	0.878607	0.890547	0.856716	0.920398	0.851741	0.929353	0.833831	1.26468
ILMN_2338733	ART5	0.926368	0.939303	0.913433	0.971144	0.968159	0.933333	1.06866	0.918408	0.940299	0.926368	0.874627	0.98806	0.81592	0.908458	0.896517	1.03682
ILMN_1762952	ARTN	0.789055	0.785075	0.822886	0.818905	0.834826	0.846766	1.10448	0.734328	0.935323	0.748259	0.751244	0.79005	0.732338	0.863682	0.80199	1.13532
ILMN_1727040	ARTN	0.932338	0.910448	0.932338	0.902488	0.832836	0.961194	1.20796	0.918408	0.814925	0.951244	0.79801	0.947264	0.848756	0.840796	0.859701	1.18308
ILMN_1773295	ARTN	3.87264	3.64179	4.10846	2.03085	4.91542	3.601	5.2398	3.87861	3.62985	3.84776	2.30846	2.20199	3.63184	4.80199	2.28259	6.06965
ILMN_1803691	ARTN	1.02189	0.923383	0.846766	0.844776	0.943284	1.03682	1.11841	0.981095	0.910448	0.989055	0.900498	1.02289	0.917413	0.909453	1.00199	1.17711
ILMN_1800935	ARV1	2.54527	1.50348	1.2199	2.31045	1.65373	2.17015	2.70348	1.94527	2.16816	1.59701	1.69851	3.2398	1.83781	1.82488	1.84975	2.0995
ILMN_1677226	ARVCF	0.946269	0.960199	0.877612	1.07562	1.09254	1.00896	1.45771	0.848756	0.953234	0.882587	0.816915	0.849751	0.874627	0.997015	0.942289	1.5801
ILMN_1720205	ARVP6125	1.07463	0.9801	1.04776	0.933333	1.04279	0.863682	1.35323	0.968159	1.01294	0.946269	0.926368	0.937313	0.965174	0.99403	1.04975	1.32438
ILMN_1724162	ARX	1.18308	1.01692	1.06567	0.98607	1.06269	1.10647	1.4995	1.14527	1.01692	0.933333	0.895522	1.09851	0.931343	1.06368	0.940299	1.19104
ILMN_1771732	AS3MT	0.99005	1.05075	0.983085	0.985075	1.07662	1.04478	1.1602	1.03682	1.12438	0.932338	0.875622	1.06368	0.909453	0.960199	0.989055	1.26866
ILMN_1684054	ASAH1	2.63284	1.85174	2.83383	5.33433	1.90945	5.46667	2.44876	1.71244	2.3005	2.601	1.77313	4.52836	2.63881	2.25075	2.21592	1.97711
ILMN_1655509	ASAH1	1.19303	0.98209	0.962189	1.12239	0.929353	1.10448	1.42289	0.960199	0.945274	1.00398	0.939303	1.00398	0.887562	1.00995	1.03582	1.12836
ILMN_1780786	ASAH2	1.03184	0.953234	0.883582	0.859701	0.856716	1.03483	1.15423	0.890547	1.02289	0.890547	0.81393	0.921393	0.942289	0.913433	0.963184	1.26866
ILMN_2118773	ASAH2B	1.23682	1.04279	1.07861	1.11443	0.963184	0.99204	1.35124	0.955224	1.00597	1.03682	0.971144	1.26269	0.955224	1.05871	1.02388	1.80796
ILMN_1773243	ASAH3	1.03284	1.03781	1.02189	0.959204	0.987065	0.900498	1.37413	0.960199	0.963184	0.955224	0.841791	1.05572	0.954229	0.959204	0.98806	1.12338
ILMN_1761000	ASAH3L	0.960199	0.941294	1.10647	1.04577	1.02985	1.03582	1.2	0.964179	0.873632	0.972139	0.935323	1.11244	0.913433	0.969154	1.06269	1.21095
ILMN_1656248	ASAM	1.10249	0.993035	0.887562	1.09353	1.04179	0.960199	1.10149	0.936318	0.995025	1.05672	0.944279	1.01692	0.991045	0.965174	0.974129	1.01891
ILMN_1685441	ASAP3	1.13333	1.05174	0.940299	1.11343	1.01095	1.13433	1.72239	1.20995	1.07164	1.10149	0.78209	1.22687	0.975124	1.16915	0.920398	1.66567
ILMN_1683096	ASB1	2.9791	2.50945	1.4607	2.56517	2.3194	2.7005	2.86468	3.28358	3.33234	1.67463	2.40398	3.25572	2.41194	2.39005	2.76119	2.74826
ILMN_1781148	ASB10	0.962189	0.852736	0.931343	0.848756	0.810945	1.03085	1.37811	0.854726	0.81194	0.924378	0.768159	0.947264	0.968159	0.917413	0.841791	1.17015
ILMN_1722024	ASB11	0.926368	0.822886	0.932338	0.849751	0.941294	0.962189	1.56716	0.767164	0.966169	0.81592	0.827861	0.789055	0.872637	0.857711	0.861692	1.35423
ILMN_1651643	ASB11	1.00896	0.899502	0.877612	0.924378	0.99602	0.954229	1.61294	0.927363	0.920398	0.851741	0.791045	0.919403	0.814925	0.889552	0.865672	1.51144
ILMN_2272251	ASB11	1.53532	1.38109	1.26965	1.42289	1.34527	1.36119	1.47164	1.37313	1.41393	1.14627	1.20896	1.36119	1.20896	1.44378	1.34627	1.65672
ILMN_1656364	ASB12	0.950249	0.872637	0.806965	0.923383	0.957214	0.826866	1.25771	0.938308	0.862687	0.834826	0.886567	0.956219	0.99403	0.880597	0.960199	0.974129
ILMN_1654385	ASB13	1.63184	1.52637	1.0607	1.66667	1.33831	1.74229	1.85373	1.36915	1.86269	1.4398	1.46667	1.92338	1.38706	1.50149	1.35224	1.84776
ILMN_1753737	ASB14	0.934328	0.866667	0.890547	0.890547	0.958209	0.78408	1.27463	0.882587	0.895522	0.770149	0.869652	0.917413	0.806965	0.910448	0.846766	1.08458
ILMN_1740528	ASB15	0.938308	0.916418	0.911443	0.98806	0.907463	0.952239	1.09453	0.977114	0.852736	0.880597	0.779104	0.902488	0.962189	0.838806	0.924378	0.957214
ILMN_1810881	ASB16	1.11542	0.928358	0.967164	0.933333	0.907463	0.907463	1.35025	1.04776	0.941294	1.02289	0.872637	0.98408	0.877612	0.844776	0.912438	1.31642
ILMN_2210101	ASB17	0.883582	0.861692	0.804975	0.863682	0.950249	0.908458	1.01493	0.812935	0.945274	0.947264	0.830846	0.950249	0.823881	0.942289	0.889552	1.08358
ILMN_1795811	ASB2	1.1602	1.00199	1.06368	1.19104	1.23383	1.11741	1.87264	1.16119	1.1801	1.14925	1.08856	1.17711	1.04478	1.15622	1.06567	1.54527
ILMN_2358783	ASB3	1.82886	1.77811	1.42488	1.82289	1.79204	1.67065	2.62388	2.1393	2.6408	1.63781	1.62985	2.63781	1.62687	1.9204	1.86567	2.90448
ILMN_1699606	ASB3	1.10348	0.820896	0.886567	1.1194	0.941294	1.14328	1.0806	0.99801	0.953234	0.846766	0.806965	1.28159	0.825871	0.878607	1.02488	0.930348
ILMN_1813668	ASB4	1.00299	0.850746	0.878607	1.01294	0.894527	0.940299	1.46169	0.895522	0.914428	0.859701	0.8199	0.900498	0.777114	0.839801	0.937313	1.42985
ILMN_1702618	ASB4	0.922388	0.928358	0.904478	0.885572	1.02687	0.913433	1.38706	0.903483	0.893532	0.849751	0.712438	0.789055	0.765174	0.834826	0.791045	1.37612
ILMN_1676066	ASB4	1.07761	0.931343	0.938308	1.04677	0.940299	0.920398	1.11144	0.896517	0.989055	0.854726	0.912438	0.960199	0.890547	0.918408	0.872637	1.12935
ILMN_2126055	ASB5	0.844776	0.880597	0.905473	0.928358	0.972139	0.892537	1.33134	0.920398	0.867662	0.866667	0.816915	0.80995	0.823881	0.940299	0.840796	1.20398
ILMN_1655532	ASB6	0.836816	0.79005	0.762189	0.858706	0.800995	0.842786	1.18109	0.78607	0.81592	0.766169	0.684577	0.944279	0.810945	0.912438	0.844776	1.09154
ILMN_1806705	ASB6	2.61493	2.32836	1.7204	1.96418	2.32239	2.53035	2.80597	1.91443	2.53731	1.94129	2.02189	3.14527	1.83184	2.02587	1.83284	2.70249
ILMN_2397776	ASB6	2.40398	2.44876	1.32338	1.87363	2.2209	2.21294	2.13632	1.87264	2.10746	1.5194	1.99403	2.75522	1.83383	1.78905	1.91542	2.0398
ILMN_1744050	ASB7	1.12736	1.04279	0.895522	0.897512	0.837811	0.864677	1.73731	0.831841	0.827861	0.920398	0.778109	0.921393	0.78607	0.908458	0.846766	1.47761
ILMN_1753040	ASB7	1.04378	0.886567	0.975124	1.1194	0.929353	1.00995	1.31343	0.957214	1.0607	0.864677	0.836816	1.0398	0.828856	0.971144	0.985075	1.11244
ILMN_1680419	ASB7	1.24876	1.11642	1.13632	1.18706	1.21194	1.3005	1.33731	0.98607	1.29552	1.06965	0.956219	1.39502	0.963184	1.22488	1.08756	1.50149
ILMN_2173740	ASB8	5.0408	3.64478	2.20199	4.03184	3.61692	4.31642	5.42289	4.53532	5.41592	3.69055	3.71144	3.56318	4.27164	4.40299	3.16318	5.11045
ILMN_2373728	ASB9	0.933333	0.827861	0.80796	1.01592	0.999005	0.892537	1.35622	0.875622	0.880597	0.793035	0.80796	1.00896	0.914428	0.840796	0.989055	1.17612
ILMN_1786041	ASB9	0.925373	0.7801	0.881592	0.903483	0.885572	0.888557	1.16219	0.838806	0.857711	0.856716	0.751244	0.942289	0.877612	0.863682	0.826866	1.03184
ILMN_1685097	ASCC1	3.99005	2.99303	1.9592	3.32935	3.26667	3.33831	3.95821	3.36816	3.5602	2.87164	2.19602	4.80697	3.16418	3.58109	2.92139	3.64378
ILMN_1679919	ASCC2	82.6418	103.3	164.453	55.6886	108.267	130.551	99.4826	95.396	75.0806	128.126	93.2657	128.547	147.901	192.777	87.1751	143.865
ILMN_1797656	ASCC3	1.04577	1.16318	0.930348	1.17711	0.977114	1.10945	1.89154	1.09751	0.931343	1.03383	0.937313	1.05572	0.874627	1.03682	0.958209	1.93433
ILMN_2294751	ASCC3	1.19602	0.972139	0.99005	1.16119	0.993035	1.16517	1.33831	1.09353	1.12239	0.904478	0.99801	1.15821	1.09353	1.04776	1.0607	1.14229
ILMN_1772177	ASCC3	1.04677	1.01194	0.947264	0.887562	1.01791	0.933333	1.67761	0.909453	0.955224	0.843781	0.899502	0.851741	0.927363	1.01194	0.905473	1.47861
ILMN_1705928	ASCC3L1	1.74527	1.70249	1.3204	1.97214	1.68259	1.80299	2.12935	1.89254	1.83582	1.12438	1.37512	2.12637	1.1791	1.59005	1.75522	1.93632
ILMN_1701653	ASCL1	1.08657	0.915423	0.960199	1.07662	0.976119	0.99801	1.32637	1.02985	1.0806	0.897512	0.930348	1.04677	0.945274	1.0398	1.02886	1.17214
ILMN_1723412	ASCL2	6.47861	7.53035	4.63483	7.04179	6.19303	6.61891	7.28955	4.01194	5.92537	5.34527	7.90448	7.84776	4.63284	4.42289	6.81294	7.60498
ILMN_1695353	ASCL3	0.987065	0.893532	0.832836	0.776119	0.950249	0.937313	1.26965	0.931343	0.826866	0.888557	0.891542	0.929353	0.799005	0.836816	0.865672	1.17413
ILMN_1813075	ASCL4	0.913433	0.893532	0.890547	0.888557	0.907463	0.895522	1.60398	0.931343	0.860697	0.758209	0.843781	0.918408	0.843781	0.887562	0.836816	1.3602
ILMN_1714737	ASF1A	2.82786	1.96915	1.59204	3.16219	2.21592	2.79403	2.70547	2.1592	2.78905	1.65274	1.74129	4.36915	2.91642	2.75224	2.26766	2.22985
ILMN_1695414	ASF1B	3.55224	2.65274	2.23781	1.73035	2.82985	2.41791	2.79502	2.12836	3.00995	2.00498	2.55721	4.03682	2.11542	3.57313	1.75622	2.68259
ILMN_1769013	ASGR1	5.97811	5.14428	3.09652	6.30647	4.96517	4.46766	7.43682	4.70846	5.7592	6.08756	4.30846	5.55622	4.60995	5.20398	3.7403	7.98706
ILMN_1700340	ASGR2	1.01791	0.964179	0.875622	0.99801	1.01095	1.00299	1.29055	1.00796	0.868657	0.971144	0.885572	1.06169	1.001	0.970149	0.949254	1.45572
ILMN_2342638	ASGR2	4.94428	3.28458	2.03184	4.90249	2.76418	5.07761	4.14428	3.40498	3.04179	3.75622	3.97413	4.22587	3.01095	3.64279	3.40199	3.25771
ILMN_1694966	ASGR2	2.52637	2.15124	1.31343	2.61194	1.95721	2.14428	2.54925	2.08657	1.96418	2.10945	1.79602	2.25274	1.58905	1.92338	1.70249	2.31443
ILMN_1782032	ASH1L	1.03881	1.03085	1.12139	0.971144	1.14826	1.01294	1.44179	1.02488	1.00498	0.924378	0.951244	1.11642	0.969154	0.993035	0.935323	1.34527
ILMN_1666933	ASH2L	7.19602	5.32239	4.82488	7.65473	5.20995	8.59502	8.43284	6.27861	7.83483	6.81194	6.09552	13.9771	6.52935	7.52637	6.38905	7.601
ILMN_1791647	ASIP	0.961194	0.983085	0.892537	1.02687	0.989055	0.891542	0.939303	0.99801	0.847761	0.818905	0.848756	0.857711	0.797015	0.8	0.850746	0.974129
ILMN_1685142	ASL	0.836816	0.885572	0.887562	0.962189	0.927363	0.976119	1.30846	1	0.966169	0.888557	0.822886	0.923383	0.867662	0.890547	0.881592	1.16119
ILMN_1685037	ASL	1.02388	1.0607	0.945274	1.01095	1.05075	0.893532	1.41493	1.00398	1.14726	0.98806	1.00199	1.27761	0.933333	1.01592	1.1194	1.29751
ILMN_2379393	ASL	1.76816	1.6796	1.43582	1.86567	1.62189	1.79303	2.01791	1.75522	2.03383	1.57512	1.67861	1.97015	1.54826	1.60299	1.70448	2.22388
ILMN_1690595	ASMT	1.0209	0.953234	0.839801	0.895522	1.04279	0.848756	1.15821	0.826866	0.849751	0.99801	0.969154	0.949254	0.855721	0.863682	1.01294	1.25274
ILMN_1804384	ASMTL	2.84378	2.8209	1.68756	1.5791	2.53333	2.20896	2.19502	2.17313	2.67861	2.41194	2.14925	3.02289	2.22985	2.05075	2.15423	2.04876
ILMN_1657571	ASNA1	0.974129	0.963184	0.923383	0.936318	0.932338	0.841791	1.83582	0.875622	0.970149	0.964179	0.743284	1.0199	0.927363	0.956219	0.840796	1.65274
ILMN_1796417	ASNS	4.20498	3.10647	1.81393	4.30846	2.92637	4.95224	3.93433	4.43284	5.39005	2.15423	3.91443	5.80597	3.16119	2.79104	4.08358	4.28557
ILMN_2398107	ASNS	1.23582	0.981095	0.965174	1.02587	0.963184	1.28259	1.54527	1.06667	1.07861	0.946269	0.870647	1.0995	0.941294	0.844776	0.884577	1.32239
ILMN_2221673	ASNSD1	9.06169	7.30647	4.83582	6.48955	6.92637	6.2796	7.16617	8.15124	9.07363	6.11343	7.06965	22.8408	7.4995	11.0259	6.56915	6.5403
ILMN_1692824	ASPA	0.902488	0.870647	0.818905	0.823881	0.869652	0.874627	1.32935	0.832836	0.842786	0.887562	0.8199	0.937313	0.837811	0.891542	0.897512	1.20398
ILMN_2352934	ASPH	1.50846	1.20398	1.15721	1.42687	1.13035	1.14826	2.1204	1.28259	1.39502	1.55721	0.983085	1.43582	1.25473	1.38408	1.2209	2.09751
ILMN_1693771	ASPH	1.03682	0.919403	0.885572	1.04378	0.985075	0.98806	1.26667	0.827861	0.957214	0.912438	0.886567	1.06269	1.0408	0.974129	1.01194	1.14328
ILMN_1739719	ASPH	1.10249	0.929353	0.98408	0.985075	0.900498	0.972139	1.11741	1.0209	0.930348	0.878607	0.893532	1.06866	0.860697	0.875622	0.98806	1.16219
ILMN_1662390	ASPHD1	0.901493	0.818905	0.932338	0.848756	0.878607	0.928358	1.42388	0.867662	0.847761	0.843781	0.857711	0.963184	0.787065	0.886567	0.903483	1.1403
ILMN_1708950	ASPHD1	0.965174	1.07264	1.02289	0.919403	1.14229	0.995025	1.78706	0.954229	1.03483	0.896517	0.824876	1.02189	0.977114	1.0796	1.01791	1.8
ILMN_2167426	ASPHD2	2.29254	1.99502	1.4806	2.67363	1.80995	2.26468	2.20398	2.07463	2.20896	2.01791	1.90945	2.60896	1.97811	2.1005	1.67761	2.23483
ILMN_1815184	ASPM	1.09154	1.05373	1.08358	1.18507	1.00796	1.07463	1.51045	1.03582	1.51144	1.00498	0.920398	1.15721	0.972139	1.08557	1.12935	1.34428
ILMN_2168166	ASPN	0.973134	0.935323	0.98607	0.942289	0.961194	0.972139	0.995025	0.889552	0.907463	1.00796	0.870647	0.931343	0.814925	1.05672	0.934328	1.00299
ILMN_1762284	ASPRV1	2.37512	2.83184	1.48856	1.59801	1.86468	2.16617	2.38109	1.78607	1.66368	2.54627	3.04776	5.51741	1.86169	2.73831	2.2408	3.0398
ILMN_1661860	ASPSCR1	1.06169	0.951244	0.963184	1.02488	1.04577	1.01194	1.26766	0.993035	1.03781	0.896517	0.966169	1.09055	0.883582	1.0398	0.971144	1.20796
ILMN_1660749	ASPSCR1	11.5015	10.7582	5.41592	13.8478	9.04975	10.19	9.94129	10.8935	13.794	7.57711	10.8697	14.21	8.4408	8.47861	11.0567	9.66866
ILMN_1810199	ASRGL1	1.06567	0.915423	0.937313	0.98806	0.99403	1.09353	1.22687	1.03682	1.1204	0.969154	0.873632	1.199	0.9801	0.935323	0.922388	1.23483
ILMN_1708778	ASS1	1.02189	0.941294	0.902488	0.99801	0.99403	0.885572	1.21194	0.833831	0.98209	0.897512	0.802985	0.960199	0.878607	0.887562	0.888557	1.36318
ILMN_2395451	ASS1	1.11642	1.03284	1.10348	1.03483	1.10547	1.21692	1.54826	0.958209	1.04179	1.09353	1.001	1.03085	0.976119	1.14826	1.0806	1.599
ILMN_1803813	ASTE1	3.14826	2.33532	1.91542	2.86965	2.61194	3.18308	3.1194	2.39602	3.10149	1.87861	2.02189	3.7005	2.72836	2.31244	2.21393	3.21692
ILMN_1728055	ASTL	1.08756	1.01095	1.00896	1.09254	0.948259	1.04677	1.64776	0.99801	1.19801	1.01194	0.852736	0.98408	1.07662	1.0796	1.09751	1.45871
ILMN_1684959	ASTN1	1.08458	0.973134	0.977114	0.941294	1.02687	0.98209	1.39602	1.04378	0.99005	0.940299	0.857711	1.03284	0.863682	0.946269	0.99801	1.32836
ILMN_1702189	ASTN1	1.09851	0.966169	1.00299	1.05771	0.892537	1.27662	1.62189	0.929353	1.0408	0.949254	0.850746	1.02189	0.916418	0.858706	0.894527	1.40796
ILMN_1744118	ASTN2	1.09652	1.05871	0.943284	0.896517	1.1403	1.03582	1.74129	1.00498	1.11841	0.957214	1.06468	0.915423	0.989055	1.13234	1.20796	1.70547
ILMN_1797283	ASTN2	0.918408	0.928358	0.934328	0.935323	0.889552	0.885572	1.37413	0.910448	0.972139	0.940299	0.879602	1.05871	0.904478	0.791045	0.853731	1.1602
ILMN_2381559	ASTN2	1.04776	0.918408	0.885572	0.98607	0.917413	0.885572	1.41791	0.989055	0.928358	0.896517	0.856716	0.878607	0.853731	0.874627	0.878607	1.40199
ILMN_1726025	ASXL1	3.41294	2.84478	1.85672	2.83781	2.66567	2.71244	3.3005	2.60498	3.09353	2.201	2.25075	3.85274	2.78507	2.52537	2.72935	2.96119
ILMN_1698968	ASXL2	9.08358	5.68657	3.6796	7.11443	5.4995	7.27264	5.65672	7.03184	7.82488	4.76617	4.92736	11.1791	5.55124	6.98408	5.89453	6.28458
ILMN_2048957	ASZ1	0.885572	0.836816	0.789055	0.889552	0.8199	0.886567	1.14925	0.843781	0.865672	0.799005	0.836816	0.928358	0.79801	0.7801	0.835821	1.20498
ILMN_2169983	ATAD1	1.59602	1.40398	1.12139	1.47164	1.21095	1.6	1.95025	1.59403	1.60896	1.22687	1.39204	1.87662	1.57413	1.41294	1.5592	1.9194
ILMN_2048700	ATAD2	1.29353	1.04478	1.08358	1.401	1.17214	1.48856	1.2398	1.3204	1.50547	1.0796	1.17512	1.88458	1.20896	1.14229	1.46169	1.08458
ILMN_1738530	ATAD3A	1.36219	1.49851	0.909453	1.25174	1.25075	1.28458	1.96517	1.33632	1.20498	1.14229	1.25473	1.16716	1.09751	1.09751	1.15025	1.73532
ILMN_2131936	ATAD3B	1.19204	0.936318	1.10746	1.11642	0.997015	1.07463	1.1204	1.03881	1.01493	1.09353	0.900498	1.01194	1.04279	1.10746	1.04577	1.10647
ILMN_2231569	ATAD3C	1.14627	1.07861	1.12438	1.14726	1.03085	1.28557	1.17214	1.06866	1.11343	1.00498	0.99801	1.21194	0.9801	1.19602	1.08358	1.19502
ILMN_1748970	ATAD4	1.85572	1.28756	1.57313	1.75721	1.72736	1.86667	2.22189	1.70348	1.65672	1.62886	1.34925	1.7592	1.45871	1.84478	1.38806	2.30348
ILMN_1656576	ATCAY	1.01592	1.08856	0.971144	0.968159	0.981095	1.05075	1.9592	0.935323	0.922388	0.898507	0.873632	0.989055	0.920398	1.01194	0.898507	1.57015
ILMN_1791400	ATE1	1.06169	0.952239	0.886567	0.848756	1.07761	1.01891	1.43781	1.03781	0.993035	0.857711	0.904478	0.987065	0.875622	0.969154	0.874627	1.1791
ILMN_2381769	ATE1	1.0607	0.953234	0.905473	0.98408	0.966169	0.999005	1.33333	0.941294	0.930348	0.844776	0.884577	0.940299	0.81791	0.761194	0.860697	1.19701
ILMN_1756867	ATE1	1.03483	0.933333	0.971144	0.923383	0.993035	0.830846	1.61692	0.942289	0.997015	0.99204	0.746269	0.901493	0.916418	0.939303	0.905473	1.44478
ILMN_1801923	ATF1	1.35622	0.954229	1.01493	1.23682	1.00299	1.43383	1.66468	1.199	1.0995	1.23582	1.001	1.39005	1.01194	0.900498	1.18308	1.60498
ILMN_1748271	ATF2	1.57811	1.11343	1.20995	1.73234	1.34627	1.68458	1.5592	1.15721	1.31443	1.29453	1.17413	1.94925	1.30249	1.20597	1.2209	1.50547
ILMN_2374865	ATF3	1.09751	1.02388	0.895522	1.39403	1.04876	1.19701	1.46468	1.00796	1.10249	1.08657	0.939303	1.38607	1.07562	0.961194	1.03881	1.32438
ILMN_1661109	ATF3	0.991045	0.903483	0.873632	0.849751	0.920398	0.869652	1.19403	0.881592	0.918408	0.916418	0.79005	0.908458	0.757214	0.908458	0.882587	1.10846
ILMN_1791346	ATF3	0.993035	0.911443	0.895522	0.985075	0.979104	0.933333	1.4209	1.00199	0.961194	0.836816	0.905473	0.98209	0.851741	0.892537	0.871642	1.11443
ILMN_1672128	ATF4	58.2647	48.0358	33.1652	47.9154	48.7662	57.3891	48.798	62.3831	62.0905	43.1522	38.9851	91.7662	52.5423	54.009	53.3095	54.1323
ILMN_1783394	ATF4	0.932338	0.99403	0.942289	1.39005	0.956219	1.55622	1.10647	0.860697	1.06567	0.950249	0.882587	1.25373	0.919403	0.946269	1.01891	1.02189
ILMN_2358457	ATF4	2.82985	2.23582	2.11542	2.7791	2.18706	3.34726	2.67065	2.31244	2.60597	2.66567	2.09154	4.65373	2.61095	2.24179	2.32239	2.22289
ILMN_1669113	ATF5	3.49055	2.82289	1.93134	3.89552	3.23284	3.18308	4.41393	3.24776	3.30448	2.88259	2.29552	3.46965	2.85075	2.50348	2.67662	4.28259
ILMN_1703471	ATF6	6.64478	4.47761	4.43781	5.64975	4.22687	6.13035	7.17711	4.2	5.90348	6.45174	5.90348	10.1065	4.55323	6.09254	6.04876	7.37313
ILMN_1706967	ATF7	1.21592	0.969154	1	1.08557	1.01294	1.09652	1.39602	1.1403	1.16119	1.06368	0.965174	1.35323	1.02886	1.04378	1.06667	1.43085
ILMN_1716435	ATF7IP	1.3005	1.16318	1.01891	1.18806	1.18806	1.2995	1.44677	1.19801	1.27065	1.19403	1.12139	1.19403	1.06667	1.06667	1.2607	1.40995
ILMN_1804445	ATF7IP2	2.1194	1.9403	1.09552	1.72537	1.90647	1.53333	2.34229	2.65174	2.76418	1.36517	1.60995	2.64876	1.64577	2.44876	2	2.14129
ILMN_2206098	ATG10	1.33433	1.0806	1.04975	1.13333	1.16716	1.1592	1.14129	1.18408	1.34129	0.905473	1.00299	1.26667	1.10149	1.03184	1.05871	1.09851
ILMN_2188204	ATG12	9.69254	7.57214	5.31144	9.26269	7.43781	8.16318	9.90348	11.601	10.6985	6.31045	8.03184	13.6149	8.1592	10.8189	7.93433	10.8756
ILMN_1725707	ATG16L1	5.33532	4.92637	2.56318	4.8806	4.15821	4.05373	4.11841	5.30149	6.15124	3.06269	4.48557	6.73134	3.96318	4.34925	4.2398	4.91841
ILMN_2365881	ATG16L1	6.14428	4.87065	2.60995	4.75522	4.1801	4.32438	3.88756	4.81294	6.2796	2.99502	5.75323	6.74726	4.2597	4.33632	4.65473	3.79005
ILMN_1664644	ATG16L2	6.43582	7.71741	5.04279	5.86866	6.14925	5.44179	8.04577	7.56418	7.86269	4.75025	13.3891	13.2308	3.9602	6.00995	6.23383	8.8597
ILMN_1756006	ATG2A	5.62189	5.27264	3.88358	4.59403	4.66368	4.6	6.2	4.201	4.3791	3.30149	10.5144	8.73134	3.55124	5.56716	4.47264	5.801
ILMN_1735006	ATG2B	1.36816	1.17512	1.11542	1.30647	1.26368	1.31443	1.66468	1.15224	1.40597	1.16219	1.27164	1.51642	1.21592	1.30249	1.16816	1.60697
ILMN_2163732	ATG3	1.45771	1.42289	1.52139	1.31542	1.41791	1.51244	2.50149	1.51343	1.46269	1.44577	1.2796	1.72537	1.39204	1.56816	1.31244	2.28557
ILMN_2313782	ATG4A	1.8806	1.999	1.38607	1.89851	1.7791	1.86269	1.82786	1.80796	2.34925	1.6607	1.57413	3.18408	1.61791	2.34129	2.01592	2.00896
ILMN_1768960	ATG4A	0.922388	0.900498	0.844776	0.871642	0.917413	0.770149	1.88159	0.852736	0.884577	0.835821	0.705473	0.933333	0.81393	0.888557	0.893532	1.44876
ILMN_1691173	ATG4B	0.840796	0.927363	0.895522	0.841791	0.896517	0.834826	1.18109	0.826866	0.944279	0.800995	0.767164	0.861692	0.810945	0.854726	0.827861	1.19602
ILMN_2411915	ATG4B	2.81791	1.51244	2.21692	3.93234	1.84378	4.86866	2.01194	1.401	1.77214	2.26368	1.60995	3.33433	2.03284	1.799	1.96716	1.88458
ILMN_2383727	ATG4C	0.916418	0.911443	0.79403	0.907463	0.848756	0.888557	1.03085	0.855721	0.925373	0.923383	0.849751	0.903483	0.740299	0.935323	0.759204	0.907463
ILMN_2180315	ATG4D	1.05871	1.06368	0.912438	0.976119	0.989055	0.981095	1.65771	1.04378	1.08259	1.08159	1.09552	0.983085	0.816915	0.955224	0.889552	1.93632
ILMN_1718265	ATG5	1.68856	1.73532	1.31244	1.74229	1.43483	1.64179	2.16318	1.799	1.98706	1.26766	1.43582	2.0806	1.52736	1.68358	1.53333	2.00796
ILMN_1790978	ATG7	7.82786	7.02687	4.68358	6.97313	5.61393	6.8796	7.73134	5.76517	8.54527	7.09353	7.1801	10.0249	5.9204	6.63682	5.96318	8.31642
ILMN_2296290	ATG9A	0.866667	0.978109	0.816915	0.757214	0.99204	0.935323	1.04975	0.829851	1.06667	1.00796	0.833831	0.901493	0.920398	0.952239	0.866667	1.0199
ILMN_2410975	ATG9A	5.11244	5.98308	3.17612	2.78209	4.4607	3.71045	4.80995	4.85672	6.42488	3.96617	4.15224	6.3791	3.77512	6.18806	4.03085	5.5403
ILMN_1739008	ATG9A	3.16318	3.55721	2.32338	1.86468	2.76418	2.58706	4.27264	3.1005	3.80597	2.92438	2.72537	3.73134	2.14229	3.29552	2.61393	5.12637
ILMN_1734655	ATG9B	1.14129	1.28159	1.18308	1.06866	1.23781	1.13134	1.42886	1.21592	1.26567	1.18109	0.944279	1.02687	1.10448	1.05373	1.19801	1.4
ILMN_1794707	ATHL1	16.9015	19.8527	3.80597	9.84975	16.1791	14.8428	12.407	9.27164	22.2547	7.95821	16.1463	20.0269	11.0756	16.3313	10.797	14.2836
ILMN_1673991	ATIC	10.9433	10.2388	3.5791	7.399	9.46368	8.48259	10.7393	9.4995	10.9075	6.18806	8.47264	13.3214	7.84776	10.1104	7.39104	10.0667
ILMN_1716384	ATL2	1.53831	1.29851	1.36915	1.84776	1.19602	1.82488	1.81294	1.47861	1.63085	1.35522	1.36219	2.2806	1.22886	1.46269	1.45871	1.77313
ILMN_1751086	ATL3	2.92239	2.63284	1.80498	2.70746	2.2607	2.91443	3.40498	1.96119	2.66468	2.12139	2.40697	4.52637	2.35622	2.44876	2.00896	3.29254
ILMN_1713630	ATM	0.967164	0.913433	0.905473	0.949254	1.00498	0.920398	1.36716	0.951244	1.01692	0.861692	0.860697	1.11642	0.940299	0.932338	0.924378	1.34428
ILMN_2370825	ATM	7.90846	4.63085	4.43781	11.7522	5.53731	10.3612	7.91343	7.21692	6.77512	4.42985	5.60498	17.2478	7.14527	5.99104	6.85075	6.87065
ILMN_1716231	ATM	0.938308	0.867662	0.822886	0.944279	0.9801	0.878607	1.11045	0.911443	0.865672	0.908458	0.806965	0.879602	0.766169	0.902488	0.933333	1.0995
ILMN_2223720	ATMIN	1.49552	1.22488	1.08856	1.33632	1.23781	1.26468	1.52139	1.3403	1.2796	1.04876	1.199	1.50348	1.16418	1.36418	1.15622	1.38408
ILMN_2373830	ATN1	1.13035	1.07562	0.978109	1.03085	1.0398	1.1393	1.45572	0.956219	0.993035	0.99005	0.927363	0.99801	0.957214	0.926368	0.915423	1.35622
ILMN_1737833	ATN1	1.2408	1.16318	1.00796	1.11542	1.15522	1.12736	1.54826	1.1791	1.25871	1.06866	0.898507	1.20498	1.02189	1.05174	1.01692	1.68358
ILMN_1711210	ATN1	0.930348	0.880597	0.959204	0.929353	0.854726	0.862687	1.50846	0.918408	0.832836	0.856716	0.81592	0.857711	0.763184	0.862687	0.779104	1.2199
ILMN_1740671	ATOH1	0.949254	0.935323	0.965174	0.960199	0.981095	0.876617	1.22687	0.873632	1.09353	0.830846	0.883582	0.964179	0.917413	0.957214	0.876617	1.19403
ILMN_2168228	ATOH7	0.99403	0.828856	0.943284	1.00697	1.04478	0.916418	1.36915	0.975124	0.964179	0.852736	0.797015	0.947264	0.770149	0.79005	0.894527	1.20995
ILMN_1654065	ATOH8	1.11741	1.20597	0.983085	0.909453	0.983085	1.17711	1.31343	1.11741	1.07065	0.845771	1.08458	1.26667	0.874627	0.901493	0.948259	1.22786
ILMN_1670609	ATOX1	9.09652	7.13731	4.64975	7.24677	6.66468	4.73035	10.1731	7.38408	7.95323	6.59701	3.06766	4.5592	6.53632	7.53632	6.04478	10.5891
ILMN_1813434	ATP10A	1.29652	1.21592	1.12438	1.14527	1.26866	1.18706	2.24975	1.04279	1.15323	1.06866	0.892537	1.06667	1.02388	1.23881	1.07463	2.05771
ILMN_1656159	ATP10D	1.39801	1.1791	1.14229	1.4398	1.31841	1.43483	1.77512	1.13234	1.15622	1.06866	1.04776	1.58806	0.969154	1.199	1.0806	1.4597
ILMN_1674217	ATP11A	0.932338	1.01692	1.00199	0.999005	0.985075	0.971144	1.20697	0.939303	0.899502	0.914428	0.852736	0.883582	0.890547	1.04179	0.946269	1.29851
ILMN_1768783	ATP11A	0.862687	0.864677	0.859701	0.912438	0.867662	0.776119	1.18109	0.7801	0.802985	0.927363	0.724378	0.927363	0.745274	0.894527	0.79204	1.38209
ILMN_2124155	ATP11B	3.46269	3.01393	2.0597	3.35721	2.73831	3.57114	3.13433	3.02388	3.58507	2.40299	3.3592	6.23781	2.32139	3.05672	3.34627	3.54527
ILMN_1661428	ATP11C	1.00597	0.911443	0.962189	0.877612	1.05871	1.01692	1.23085	1.17214	0.906468	0.900498	0.907463	1.07264	0.834826	0.9801	0.928358	1.07861
ILMN_2389810	ATP11C	1.76617	1.31244	1.22687	1.75821	1.4	1.85174	2.01692	1.57313	1.6607	1.27363	1.51741	2.32139	1.44577	1.38408	1.54527	1.80398
ILMN_1687765	ATP12A	1.0995	1.04975	0.99403	1.02189	0.953234	0.936318	2.03582	0.904478	1.00498	0.978109	0.888557	0.974129	0.879602	0.98209	1.12537	1.68657
ILMN_2134224	ATP13A1	2.91542	2.86169	1.77313	3.72935	2.57313	2.8	2.6408	3.12338	3.02687	2.6	2.5602	3.6995	2.81294	4.28159	2.6597	3.26368
ILMN_1704164	ATP13A2	1.87562	2.09453	1.07463	1.70647	1.7801	1.82886	2.13731	1.57114	1.97015	1.39204	1.58109	1.93532	1.49652	1.5801	1.46368	2.44378
ILMN_1651303	ATP13A4	0.942289	0.846766	0.860697	0.888557	0.892537	0.860697	1.57413	0.914428	0.962189	0.844776	0.79801	0.885572	0.812935	0.850746	0.867662	1.29652
ILMN_1775285	ATP13A5	0.987065	0.848756	0.895522	0.863682	0.920398	0.804975	1.24179	0.818905	0.829851	0.863682	0.765174	0.999005	0.821891	0.79801	0.836816	1.19303
ILMN_1731783	ATP1A1	8.28955	8.6806	3.32139	6.56318	8.25373	6.54428	5.84876	9.35323	11.0159	5.43284	6.33731	9.58607	7.33333	7.4607	7.07861	5.90448
ILMN_2415189	ATP1A1	15.4577	13.6498	4.56816	11.9851	12.1303	9.31244	14.7612	16.4468	18.993	8.99204	11.7184	17.1532	11.6935	11.2279	13.3204	13.7303
ILMN_1775566	ATP1A1	5.02289	3.77114	2.45672	4.38209	4.22786	4.34925	2.62587	3.8806	4.27861	3.75522	4.07065	7.79403	4.1005	3.5791	4.53731	2.44577
ILMN_1777411	ATP1A2	0.857711	0.821891	0.897512	0.820896	0.814925	0.8199	0.937313	0.754229	0.80995	0.844776	0.741294	0.863682	0.779104	0.98408	0.81393	0.967164
ILMN_1689098	ATP1A3	1.25174	1.16418	1.18905	1.18209	1.18408	1.14229	1.96816	1.29751	1.06269	1.23881	0.861692	1.02189	1.09851	1.15323	1.15025	1.68557
ILMN_1696132	ATP1A4	0.952239	0.884577	0.941294	0.944279	0.866667	0.870647	1.201	0.911443	0.821891	0.993035	0.810945	0.888557	0.776119	0.849751	0.932338	1.14428
ILMN_1705208	ATP1A4	1.00597	0.949254	0.81592	0.978109	0.98408	0.880597	1.6398	0.974129	1.001	0.987065	0.879602	1.30249	0.943284	0.887562	1.01095	1.41891
ILMN_1658071	ATP1B1	1.0597	0.879602	1.0199	1.05672	0.869652	1.14428	1.83781	0.971144	1.1204	0.989055	0.770149	0.958209	0.859701	1.00995	0.950249	1.58607
ILMN_2407824	ATP1B1	1.15423	1.12836	1.10746	1.3592	1.01393	1.54229	1.9393	1.47761	1.35124	0.98607	1.02886	1.38408	1.19303	1.41692	1.13831	1.84975
ILMN_1730291	ATP1B1	1.09254	1.05274	0.938308	1.40796	1.04677	1.31642	1.40995	1.11642	1.19602	1.03682	1.00896	0.950249	1.07463	0.928358	1.15522	1.2398
ILMN_1747271	ATP1B2	2.21692	2.01891	1.45373	2.34328	1.82687	1.47164	2.86667	2.27861	2.65771	1.82985	1.53532	2.12338	2.07861	2.41592	2.13532	3.03284
ILMN_1783304	ATP1B3	9.22388	8.1791	4.59303	10.5095	7.06368	10.39	10.1333	8.02886	10.394	7.01791	5.31542	14.6577	7.74925	8.41294	6.49453	11.4517
ILMN_1654322	ATP1B3	2.1403	1.201	1.58607	3.39104	1.47264	3.38209	1.70647	1.11841	1.52338	2.01891	1.20597	3.03781	1.81194	1.3592	1.45473	1.50846
ILMN_1759628	ATP1B3	6.11741	5.19502	2.97114	6.80697	4.70348	7.11741	7.19701	5.87065	6.24677	4.79005	4.19005	8.83781	5.03682	6.00896	4.62488	8.5005
ILMN_1653211	ATP1B4	1.05871	1.11045	0.868657	0.936318	0.99602	1.0806	1.41692	0.944279	1.03184	0.873632	0.974129	0.887562	0.858706	0.914428	0.918408	1.24975
ILMN_1709541	ATP2A1	0.926368	0.907463	0.972139	0.950249	0.944279	0.905473	1.24279	0.891542	0.864677	0.876617	0.81393	0.927363	0.833831	0.884577	0.822886	1.15821
ILMN_1674460	ATP2A1	0.892537	0.960199	0.850746	0.936318	0.942289	0.851741	1.46468	0.838806	0.857711	0.851741	0.855721	0.934328	0.972139	1.07463	0.924378	1.26667
ILMN_1655884	ATP2A2	2.34328	1.54826	1.46866	2.27662	1.5393	2.78905	1.72438	1.4995	1.88657	1.82786	1.71542	3.21592	2.13532	1.87363	1.92537	1.49055
ILMN_1687375	ATP2A2	2.86766	1.94527	1.54826	3.19303	2.27761	3.4408	3.35423	2.5393	2.96716	2.14826	2.22786	4.63781	2.45572	2.55323	2.59502	3.41393
ILMN_1815666	ATP2A2	2.7791	2.45672	1.6	2.04478	2.58209	2.4398	2.61194	2.67562	2.66169	2.201	2.20597	2.89652	2.37512	2.44776	2.4408	2.60896
ILMN_1697827	ATP2A3	1.74627	1.3194	1.23085	1.61592	1.3791	1.34428	2.15821	1.41692	1.8398	1.25075	1.27164	2.04776	1.36219	1.29453	1.49453	2.201
ILMN_2310909	ATP2A3	3.67065	3.96219	2.04478	2.52239	3.23781	3.28259	3.4209	3.89055	3.96318	2.95522	3.81095	4.2607	2.76418	3.47562	2.88856	3.63682
ILMN_2401933	ATP2B1	1.64677	1.22687	1.13333	1.4806	1.28756	1.78209	2.14527	1.49154	1.24478	1.39602	1.29751	2.03284	1.2199	1.56318	1.42985	1.66667
ILMN_1750599	ATP2B1	0.951244	0.871642	0.932338	0.879602	0.970149	0.918408	2.04677	0.869652	0.860697	0.888557	0.79602	0.861692	0.866667	0.852736	0.890547	1.62886
ILMN_1802223	ATP2B2	0.974129	0.970149	0.938308	0.929353	1.00199	0.889552	1.43085	0.970149	0.962189	0.944279	0.901493	0.904478	0.80398	0.943284	1.00299	1.29851
ILMN_1734788	ATP2B2	0.897512	1.04776	0.875622	0.845771	0.917413	0.929353	1.23881	0.888557	0.949254	0.850746	0.757214	0.906468	0.826866	0.890547	0.850746	1.19701
ILMN_2381938	ATP2B2	0.927363	0.854726	0.838806	0.894527	0.919403	0.820896	1.39005	0.853731	0.844776	0.822886	0.806965	0.895522	0.80796	0.793035	0.936318	1.23881
ILMN_1693481	ATP2B3	0.955224	0.850746	0.911443	1.02587	0.925373	0.818905	1.30448	0.927363	0.940299	0.826866	0.869652	0.857711	0.844776	0.890547	0.81592	1.41791
ILMN_1660741	ATP2B3	1.12338	1.06368	0.883582	0.955224	0.98607	0.954229	1.89851	0.983085	0.99801	0.855721	0.850746	1.05572	0.865672	0.99005	0.915423	1.92239
ILMN_2415073	ATP2B3	0.899502	0.987065	0.880597	0.879602	0.893532	0.890547	1.18408	0.991045	0.896517	0.969154	0.896517	0.876617	0.842786	0.902488	1.05672	1.12537
ILMN_1664772	ATP2B4	1.79502	1.2408	1.26766	1.53532	1.41095	1.57512	1.66766	1.1602	1.52736	1.12637	1.30249	2.44776	1.2199	1.13035	1.40398	1.75323
ILMN_2367753	ATP2B4	12.2338	8.16716	3.76318	7.52935	8.10547	9.4796	7.24975	5.8	10.7502	7.72537	8.84179	18.2179	6.86269	10.2816	7.56418	6.83582
ILMN_1696568	ATP2C1	1.27662	1.29453	1.01493	1.33134	1.1801	1.35423	1.74428	1.47264	1.37214	1.28259	1.27861	1.82189	1.39602	1.35522	1.20498	1.4796
ILMN_1758784	ATP2C1	1.20498	1.00896	1.10249	1.20199	1.28657	1.38706	1.78209	1.29055	1.1194	1.14726	0.956219	1.2398	1.03085	0.997015	1.09254	1.42388
ILMN_2340565	ATP2C1	2.06169	1.18507	1.58308	2.71642	1.34229	2.94826	1.85075	1.54428	1.62886	1.65672	1.33333	3.75821	1.91642	1.45075	1.53134	1.35821
ILMN_1785413	ATP2C2	0.949254	0.901493	0.954229	1.1005	0.909453	0.885572	1.18507	1.01194	1.02189	0.970149	0.851741	0.956219	0.791045	0.814925	0.864677	1.06169
ILMN_2209417	ATP4A	1.08856	1.00796	1.02985	1.03383	1.03483	0.791045	1.05274	0.993035	0.881592	0.902488	0.808955	0.948259	0.833831	0.887562	0.891542	1.08358
ILMN_1796405	ATP4B	0.944279	0.933333	0.98607	0.941294	1.01194	0.900498	1.18706	0.907463	1.11741	0.871642	0.937313	1.05572	0.869652	0.837811	0.771144	1.12239
ILMN_1703787	ATP4B	1.02488	1.02189	0.955224	0.989055	0.958209	1.04975	1.12836	0.922388	0.892537	1.00796	0.893532	1.0408	0.843781	0.927363	1.07264	1.18109
ILMN_2341363	ATP5A1	54.1522	33.4965	23.6199	53.5184	39.2388	54.2139	39.9622	34.8965	53.9711	40.8219	34.1692	84.3373	45.4687	49.198	40.1035	33.7144
ILMN_1764494	ATP5A1	57.4	39.7423	24.5532	50.5781	40.5303	56.7761	46.4219	39.2129	61.1134	46.2786	36.4846	81.4597	48.1194	49.199	41.6677	44.8189
ILMN_1772132	ATP5B	100.403	76.4517	56.6109	88.6945	65.8796	87.393	87.0169	77.4478	88.3433	89.0826	64.3184	130.015	74.402	92.1363	73.4119	88.4328
ILMN_1701269	ATP5C1	8.08856	3.91045	3.99801	10.3174	4.85473	9.07861	5.60697	4.45871	6.41095	6.67861	5.05771	14.1403	7.58706	6.26866	5.45174	4.55025
ILMN_1679178	ATP5D	2.27761	2.80896	1.46766	1.87264	2.19502	2.26169	3.11244	1.98507	3.00597	1.97214	1.92736	2.44478	1.90846	2.04677	2.0398	3.24378
ILMN_1653599	ATP5D	22.0607	24.6199	9.88955	13.6975	18.4438	19.1881	20.7512	16.2318	24.2488	15.7493	14.9771	18.3075	16.4119	19.4995	17.8995	19.5602
ILMN_2225887	ATP5EP2	205.678	147.438	170.987	175.143	135.882	150.05	148.676	128.431	173.067	209.551	58.7184	93.0129	166.475	218.553	145.267	137.039
ILMN_1672191	ATP5F1	4.14428	1.74925	2.44179	4.64876	2.16119	5.76318	2.4995	1.85075	2.54627	3.32537	2.13831	6.07761	3.31244	2.4209	2.399	2.18109
ILMN_1721989	ATP5F1	23.7672	14.3174	12.0726	22.9463	15.6726	22.5632	23.7194	15.5642	19.1433	17.2239	15.4876	34.3502	18.4368	20.5861	15.4318	19.9323
ILMN_1712430	ATP5G1	1.1194	0.967164	0.914428	1.0995	0.899502	0.80995	2.24577	0.900498	1.11144	0.99602	0.841791	1.04478	0.896517	1.05572	0.936318	1.63184
ILMN_1676393	ATP5G1	9.44677	7.19005	4.08458	7.9393	9.4199	5.02388	9.68159	10.0179	12.2488	5.87065	4.92935	6.03682	8.77512	8.27264	7.97313	10.4318
ILMN_1807798	ATP5G2	1.01891	0.933333	0.942289	0.806965	0.953234	0.940299	1.10348	0.953234	0.974129	0.901493	0.894527	0.905473	0.893532	0.917413	0.80398	1.12935
ILMN_1669102	ATP5G2	1.5393	1.23284	1.05274	1.37114	1.24677	1.12139	1.73831	1.21294	1.45274	1.25771	0.98607	1.18706	1.37114	1.21393	1.32438	1.42488
ILMN_1660577	ATP5G2	43.1612	27.9144	15.9174	42.5015	28.1164	29.1403	34.4567	30.7572	42.2398	28.9373	19.7811	36.2945	36.7781	30.5323	29.3861	28.4766
ILMN_1770466	ATP5G3	1.20498	1.04179	1.03284	1.15025	1.16318	1.17015	1.33134	1.05871	1.02587	1.08358	0.971144	1.13532	0.99602	1.05373	1.07065	1.34229
ILMN_1794912	ATP5H	27.5612	22.4119	12.0796	27.0219	21.4418	18.0229	36.4726	22.9075	25.4209	20.9164	14.8925	26.4149	25.1214	24.5373	21.5821	34.0229
ILMN_1666372	ATP5H	32.9502	23.3493	13.8766	28.2806	24.0388	20.1104	36.8428	22.7274	28.6905	23.4418	14.409	27.4219	26.8577	28.3801	21.5373	34.998
ILMN_1726603	ATP5I	50.6269	29.6209	24.5124	40.6289	41.2816	26.4348	60.7214	45.7791	53.4597	33.6766	17.8726	20.1274	38.1532	44	36.8687	61.4776
ILMN_1772506	ATP5I	4.35025	3.08358	2.51045	4.06169	3.64776	2.64279	3.75622	3.999	4.34129	3.51144	1.80995	2.4796	3.82587	3.90647	3.65672	3.40597
ILMN_1652806	ATP5J	2.07363	1.3791	1.38408	1.98806	1.6806	1.50647	2.23881	1.68557	1.80299	1.42587	1.07861	1.9403	1.6398	1.52736	1.4796	1.89751
ILMN_1772929	ATP5J	14.0657	8.5393	7.09552	14.3274	9.68358	9.51045	14.3672	9.90547	13.4677	10.6537	6.34328	14.5254	12.5313	11.3065	10.599	11.9264
ILMN_2348093	ATP5J	15.4259	9.83383	8.34527	16.19	9.66567	11.3572	15.7303	11.4229	15.6736	12.6139	6.7791	15.7493	13.7731	13.4567	12.2836	13.4557
ILMN_2307883	ATP5J2	13.4109	9.70647	7.84876	11.7871	11.6866	7.14527	15.6856	11.3114	14.5662	11.7095	5.48458	8.21493	11.2537	13.0308	9.76517	16.1284
ILMN_2310621	ATP5J2	18.7005	13.9811	10.9065	15.3542	14.7801	9.86368	20.1194	14.6876	20.1851	14.8876	6.4607	9.82786	13.9572	17.3025	13.19	21.192
ILMN_2079285	ATP5L	2.60498	1.98905	1.40896	2.62189	1.97413	2.39602	3.50448	2.35025	2.54627	1.84179	1.76517	3.53433	2.17114	2.50945	2.10846	3.46169
ILMN_1791332	ATP5O	23.8169	14.9821	10.1493	23.3303	15.7194	15.7244	21.5403	18.7015	19.9393	17.7194	12.5542	26.3005	21.409	19.9622	18.7692	19.6537
ILMN_1700625	ATP5S	1.71045	1.29851	1.37512	1.67164	1.61294	1.84876	1.8	1.36219	1.61891	1.34826	1.16418	1.84179	1.67164	1.51642	1.26965	1.47761
ILMN_2299843	ATP5S	2.22488	1.52438	1.46667	2.01393	1.68557	1.8597	2.48657	1.41891	1.56915	1.50249	1.17214	2.03483	1.74527	1.75025	1.22488	2.12836
ILMN_1809027	ATP5SL	7.0607	4.89751	3.34328	5.82786	5.49851	6.17114	6.07463	4.89851	5.68358	4.95423	4.62587	9.64776	5.28657	5.33731	5.81493	5.89453
ILMN_1697694	ATP6AP1	33.4667	30.1771	23.9254	36.2348	27.8786	34.7403	29.8786	28.5393	34.4776	28.0338	27.4408	48.5791	24.3154	29.9045	30.591	32.4507
ILMN_1677440	ATP6AP2	21.793	13.9313	13.1313	20.9224	13.8736	21.0129	23.5244	15.0488	16.999	16.0876	14.2507	34.8517	14.4856	21.2109	13.602	18.5652
ILMN_1752579	ATP6V0A1	11.8219	10.5861	10.1711	11.9274	9.17811	11.9512	11.0935	10.1433	11.594	10.2896	11.7015	22.7363	7.17413	10.9104	10.5483	10.7075
ILMN_1700380	ATP6V0A2	2.17512	1.77413	1.47164	2.26269	2.1194	1.79403	2.62786	2.41095	2.69652	1.58706	1.96219	3.27264	1.79303	2.06866	1.93134	2.37512
ILMN_1812896	ATP6V0A4	0.949254	0.888557	0.866667	0.948259	0.918408	0.872637	1.37015	0.957214	0.916418	0.837811	0.79602	0.945274	0.720398	0.903483	0.924378	1.02488
ILMN_1721788	ATP6V0A4	1.20597	0.943284	1.0597	1.10149	1.18308	0.977114	1.08259	1.05572	1.04279	1.03184	0.916418	1.11642	1.02886	1.07264	1.15622	1.24876
ILMN_1678186	ATP6V0A4	0.878607	0.830846	0.853731	0.902488	1	0.854726	1.31244	0.914428	0.880597	0.920398	0.800995	0.944279	0.832836	0.864677	0.908458	1.15323
ILMN_2394287	ATP6V0A4	0.904478	0.849751	0.909453	0.981095	0.896517	0.867662	1.08259	0.862687	0.824876	0.873632	0.772139	0.989055	0.800995	0.956219	0.853731	1.03483
ILMN_1721391	ATP6V0B	68.7114	72.1493	60.5284	46.7801	63.5831	52.1592	64.5622	49.0488	53.8428	65.9741	66.0965	97.8726	50.1672	80.6139	61.3075	59.6308
ILMN_2353642	ATP6V0B	2.49154	2.7801	2.56617	2.27562	2.4408	2.31244	4.08756	2.60697	2.36915	2.47363	2.44876	3.27363	1.95323	2.71343	2.28657	4.36119
ILMN_1773849	ATP6V0C	23.4756	21.1194	29.8736	13.9741	23.8896	29.6955	21.8567	13.0826	12.4547	27.8975	15.5154	19.002	17.7811	25.0527	15.9522	21.6199
ILMN_1795826	ATP6V0D1	30.2189	26.591	17.0348	18.2109	20.1801	27.1403	23.9502	13.995	21.2438	21.3005	28.2289	47.7194	18.5711	28.4826	19.9662	22.6955
ILMN_1799889	ATP6V0D2	1.07761	0.900498	0.964179	1.08856	0.958209	1.07662	1.4995	1.00199	0.976119	0.98209	0.917413	1.0806	1.03582	0.975124	1.12637	1.28259
ILMN_2071937	ATP6V0E1	99.9045	78.0607	67.2677	82.9224	77.4338	67.7751	108.964	70.4488	77.01	81.2627	71.0806	115.919	82.2468	102.526	71.1841	109.448
ILMN_1785095	ATP6V0E2	10.0687	9.11244	3.63284	9.56617	7.401	7.62587	7.1403	8.5592	11.4557	4.34925	8.9403	13.6279	7.57313	5.99104	7.56219	7.27761
ILMN_1711516	ATP6V1A	24.6617	15.5114	17.4736	22.4378	18.5532	29.9294	29.7104	15.0726	16.2985	18.6985	21.9662	54.2647	16.809	26.3582	18.393	27.7363
ILMN_1812073	ATP6V1B1	0.9801	1.02587	1.04975	1.55423	0.963184	0.946269	1.36915	0.923383	0.945274	0.865672	0.930348	0.964179	0.970149	0.917413	1.03184	1.33731
ILMN_1787705	ATP6V1B2	119.619	76.6458	72.605	86.9881	78.8269	109.196	121.145	68.2388	90.9194	84.2587	105.622	202.347	78.1323	137.6	76.3801	111.816
ILMN_1659801	ATP6V1C1	2.72139	2.34229	1.53333	1.95821	1.94129	1.98607	2.89154	2.28657	2.5801	1.85672	2.25473	4.44975	1.92139	2.87562	2.30448	2.98507
ILMN_1663257	ATP6V1C1	0.883582	0.949254	0.940299	0.929353	0.877612	0.905473	1.27861	0.832836	0.866667	0.910448	0.833831	0.942289	0.857711	0.877612	0.969154	1.02687
ILMN_1660729	ATP6V1C2	0.915423	0.839801	0.869652	0.837811	0.860697	0.835821	1.35124	0.895522	0.894527	0.864677	0.862687	0.823881	0.773134	0.833831	0.866667	1.17711
ILMN_2389995	ATP6V1C2	1.11343	0.882587	0.964179	0.918408	0.841791	0.832836	1.3005	0.776119	0.742289	0.879602	0.703483	0.902488	0.79801	0.899502	0.853731	1.25373
ILMN_1797310	ATP6V1D	11.0318	9.00398	5.95522	9.51443	8.58109	9.60498	12.3194	7.89552	9.85473	9.60896	8.50746	21.41	7.86567	13.9632	8.51045	13.2149
ILMN_2339779	ATP6V1E1	44.5433	32.8796	24.992	29.9124	27.601	33.6756	41.9363	30.805	38.792	31.4199	28.4935	50.4468	34.3493	44.7682	30.5095	33.9264
ILMN_1798485	ATP6V1E1	37.5572	29.1701	18.394	26.4338	23.0458	26.6209	33.7313	26.4866	31.7204	23.7632	25.599	40.9721	25.1303	33.4597	24.5423	29.8856
ILMN_1810235	ATP6V1E2	2.03682	1.73831	1.27363	1.97413	1.86269	2.13035	2.46866	1.8209	2.24876	1.80398	1.41294	2.48657	1.6995	1.87363	1.56517	2.04179
ILMN_2099783	ATP6V1F	28.1592	22.402	14.3781	26.7582	21.9264	17.1214	28.999	21.791	23.5313	20.5134	12.8587	25.5095	22.5313	22.8318	20.1433	28.597
ILMN_1784523	ATP6V1G1	22.3562	15.2129	12.7154	23.9413	14.8279	19.5005	28.6209	17.0716	19.1443	14.2259	12.801	35.7095	17.1741	19.9174	18.0587	25.4667
ILMN_1654541	ATP6V1G2	1.27562	1.08756	1.23284	1.42985	1.14129	1.34428	1.92139	1.36119	1.17512	0.98209	1.04776	1.5005	1.11343	1.17413	1.1791	1.51144
ILMN_1674778	ATP6V1G2	0.863682	0.923383	0.8199	1.05075	0.972139	0.857711	1.00896	0.877612	0.908458	0.881592	0.802985	0.898507	0.844776	0.975124	0.843781	1.22488
ILMN_2371001	ATP6V1G3	0.963184	0.883582	0.905473	0.960199	0.879602	1.00796	1.18706	0.983085	0.951244	0.906468	0.860697	0.932338	0.963184	0.847761	0.887562	1.02786
ILMN_1689473	ATP6V1H	1.09453	0.904478	0.926368	0.899502	0.894527	0.879602	1.34229	0.946269	0.969154	0.993035	0.946269	0.985075	0.868657	0.891542	0.952239	1.32836
ILMN_2403730	ATP6V1H	3.30746	2.42786	1.92438	2.79204	2.43184	2.53433	3.24776	2.53234	3.23682	2.19204	2.48159	4.799	2.35522	2.86368	2.90149	3.09353
ILMN_1808115	ATP7A	1.60299	1.21194	1.16617	1.51244	1.2	1.40796	1.70746	1.17811	1.30746	0.963184	1.45274	2.40896	1.21493	1.33333	1.03582	1.599
ILMN_1696223	ATP7B	1.21891	1.07463	1.03582	1.29055	1.04179	1.00299	1.66667	1.06866	1.05174	1.10846	0.886567	1.10448	0.927363	1.2209	1.16716	1.41095
ILMN_1722056	ATP7B	1.08358	1.08159	1.07363	1.08955	0.985075	1.2398	1.37114	1.05672	0.930348	1.04876	1.13831	1.2806	1.05473	1.18607	0.997015	1.47463
ILMN_1778358	ATP8A1	1.05572	0.947264	0.99005	1.01692	0.936318	1.10846	1.50547	0.912438	0.987065	0.903483	1.01393	1.22388	0.949254	0.903483	0.910448	1.31841
ILMN_1693896	ATP8A2	1.30249	1.20299	1.32239	1.18109	1.41592	1.23383	1.58408	1.27662	1.21294	1.04876	0.932338	1.18109	1.0597	1.14129	1.15423	1.49453
ILMN_1710523	ATP8B1	1.02289	0.946269	0.993035	0.968159	1.0408	1.11343	1.60498	0.935323	1.05473	0.896517	0.837811	1.10746	1.00995	0.973134	0.893532	1.34726
ILMN_2301193	ATP8B2	1.0199	1.11244	1.01891	1.20995	1.0806	1.10149	1.75423	0.941294	1.09353	0.862687	0.837811	1.12836	0.876617	1.00995	0.936318	1.57114
ILMN_1782057	ATP8B2	3.26169	2.85373	1.4	2.42488	2.78905	2.93234	3.8607	3.37711	3.80697	1.97612	1.66567	2.34925	2.9194	2.27761	2.67164	4.0398
ILMN_1653372	ATP8B3	1.10746	0.979104	0.957214	1.04179	1.10348	1.08657	1.24975	1.03284	1.04677	0.978109	0.823881	1.05274	0.821891	0.930348	0.924378	1.05274
ILMN_1783956	ATP8B4	3.09254	3.47662	2.60199	4.4	3.16517	3.201	4.67065	4.18706	5.48955	2.25174	2.94726	7.85672	2.25174	3.21095	4.59005	4.37214
ILMN_1706406	ATP9A	1.03682	0.908458	0.935323	1.00299	0.959204	0.947264	1.83284	0.836816	0.869652	0.888557	0.869652	0.920398	1.01692	1.05473	0.897512	1.76418
ILMN_2089073	ATP9A	4.04378	3.36318	2.38806	3.09453	3.86567	3.5204	4.23284	8.07463	5.11144	4.00398	3.75522	7.04378	3.23383	4.03284	3.46269	5.5403
ILMN_1658684	ATP9B	1.50846	1.25373	1.04677	1.29154	1.27065	1.13333	1.75323	1.31343	1.22488	1.01891	1.01294	1.17114	1.06468	0.987065	1.56617	1.64876
ILMN_1790603	ATPAF1	2.94925	2.14527	1.70547	2.52935	2.37711	3.29851	3.74328	2.84776	3.00299	2.10547	1.75721	3.70249	2.23284	2.59701	2.3791	4.05572
ILMN_2395055	ATPAF1	1.75821	1.69154	1.34129	2.01592	1.67164	2.05373	2.37413	2.11045	2.22886	1.36418	1.51841	2.57114	1.69652	1.77313	1.79801	2.3393
ILMN_1727390	ATPAF2	1.38706	1.42886	1.16716	1.32935	1.1403	1.29453	1.58706	1.32537	1.19204	1.09751	1.07164	1.88259	1.21493	1.35821	1.12736	1.70846
ILMN_1704943	ATPBD1C	1.15025	0.954229	0.9801	1.10448	1.06468	1.05473	1.38408	1.02189	0.962189	1.03284	0.934328	1.51642	0.931343	1.04677	0.955224	1.14925
ILMN_1682375	ATPBD3	1.51244	1.3194	1.5005	1.29154	1.53134	1.35622	3.00498	1.45871	1.48159	1.41194	1.22189	1.39403	1.10846	1.17512	1.36119	2.92239
ILMN_2140207	ATPBD4	1.36219	1.05174	1.02985	1.32836	1.12935	1.25473	1.75323	1.32935	1.20498	1.00796	0.910448	1.35622	0.953234	1.10945	1.1393	1.71642
ILMN_1727332	ATPIF1	4.60199	3.06368	2.67164	4.46866	3.22388	2.58806	5.47761	3.77214	4.46368	3.52239	2.24975	3.00796	3.76318	3.68259	3.5403	5.14826
ILMN_1685978	ATPIF1	1.75025	1.60995	1.20299	1.63284	1.61493	2.10746	2.26965	1.71542	1.60896	1.19104	1.85373	2.5801	1.53134	1.69453	1.87562	1.90149
ILMN_2277201	ATR	0.855721	0.850746	0.987065	0.810945	0.865672	0.816915	1.21095	0.908458	0.845771	0.909453	0.830846	0.845771	0.773134	0.800995	0.900498	1.05373
ILMN_1810385	ATR	0.858706	0.828856	0.825871	0.953234	0.856716	0.830846	1.3204	0.958209	0.79204	0.821891	0.802985	0.878607	0.916418	0.751244	0.936318	1.06766
ILMN_2376771	ATR	1.38905	1.23582	1.09652	1.54428	1.1602	1.17811	2.00597	1.40796	1.6199	1.15821	0.978109	1.1602	1.08358	0.981095	1.21294	1.68259
ILMN_2370464	ATRIP	2.13035	2.32537	1.401	1.62488	1.5005	1.66368	2.00498	1.98806	2.4398	1.65473	1.95323	2.64279	1.82388	1.92935	1.86567	2.00995
ILMN_1653896	ATRIP	1.75522	1.74627	1.13831	1.51741	1.37313	1.5204	2.28159	1.81592	2.00796	1.25572	1.59502	1.9791	1.32239	1.39502	1.51045	1.91144
ILMN_2355586	ATRN	0.967164	0.916418	0.911443	1.08557	1.09254	1.05075	1.26269	0.943284	0.963184	0.944279	0.9801	1.07662	1.00199	1.00199	1.09254	1.2796
ILMN_2297205	ATRN	0.970149	0.873632	0.832836	0.838806	0.931343	0.969154	1.38308	0.846766	0.872637	0.911443	0.799005	1.05174	0.884577	0.875622	0.894527	1.21791
ILMN_1678541	ATRN	0.938308	0.961194	0.899502	0.838806	0.875622	0.9801	1.40597	0.891542	0.864677	0.791045	0.770149	0.886567	0.688557	0.851741	0.908458	1.30547
ILMN_1786966	ATRNL1	0.874627	1.00199	0.938308	0.981095	0.865672	0.951244	1.44179	0.849751	0.917413	0.875622	0.756219	0.896517	0.806965	0.975124	0.890547	1.24378
ILMN_1666885	ATRX	1.0408	0.935323	1.1403	1.04478	1.03085	1.21692	1.51642	0.942289	0.955224	0.932338	0.836816	1.09055	1.04179	0.957214	0.965174	1.34726
ILMN_2334256	ATRX	0.893532	0.835821	0.878607	0.881592	0.822886	0.827861	1.19403	0.941294	0.774129	0.80398	0.787065	0.804975	0.79602	0.856716	0.791045	1.06468
ILMN_1726576	ATRX	0.921393	0.81393	0.808955	0.78806	0.793035	0.838806	1.28458	0.783085	0.877612	0.797015	0.736318	0.849751	0.8	0.740299	0.824876	1.20199
ILMN_2153332	ATXN1	3.95721	2.64677	2.61294	2.74328	2.48756	4.55025	3.00398	2.50647	3.08856	3.03383	3.26667	6.42189	2.8209	3.23682	2.90249	3.41393
ILMN_2169676	ATXN10	1.03483	1.04677	0.865672	1.03284	1.03582	1.04279	1.67662	0.930348	1.07562	0.845771	0.8199	1.24279	0.870647	0.999005	0.960199	1.54129
ILMN_1743829	ATXN2	7.88657	6.88259	4.81393	9.26866	6.20796	9.11144	8.35423	7.53632	8.16617	5.6806	5.74726	13.7532	6.2597	6.23781	7.4199	8.73532
ILMN_2271627	ATXN2L	1.76219	1.94129	1.3801	1.52736	1.68657	1.57512	1.62985	1.93433	1.67861	1.40796	1.63682	2.17811	1.50348	1.48358	1.44876	1.54627
ILMN_2354334	ATXN2L	1.35224	1.1204	0.902488	1.37214	1.07761	1.02786	1.55821	1.2	1.1592	1.02388	1.14229	1.03682	0.942289	1.0607	1.01095	1.36318
ILMN_2393497	ATXN3	4.03483	3.9602	2.80498	5.81194	3.90547	5.03881	4.37015	4.57711	4.82985	3.33433	2.55323	7.15522	4.07861	3.95323	3.86269	4.27562
ILMN_1725696	ATXN3	1	0.983085	0.98806	1.17413	0.965174	1.11045	1.46368	1.10547	1.01592	0.856716	0.916418	1.1791	1.01095	1.03483	1.00796	1.64677
ILMN_1688602	ATXN7	0.942289	0.771144	0.825871	0.880597	0.923383	0.935323	1.58408	0.896517	0.931343	0.787065	0.894527	0.889552	0.895522	0.908458	0.840796	1.56318
ILMN_1777260	ATXN7L1	1.0209	0.895522	0.925373	0.969154	0.942289	0.948259	1.4995	0.926368	0.80796	0.829851	0.964179	1.08358	0.80199	0.912438	0.912438	1.36517
ILMN_1664177	ATXN7L2	1.71642	1.79104	1.15721	1.5393	1.60398	1.29154	1.61095	1.57015	1.53035	1.11045	1.70945	1.73632	1.06866	1.22985	1.44378	1.8398
ILMN_2111556	ATXN8OS	0.871642	0.830846	0.873632	0.902488	0.991045	0.862687	1.24776	0.781095	0.881592	0.907463	0.884577	0.856716	0.876617	0.877612	0.895522	1.07363
ILMN_2231911	AUH	1.90348	1.36617	1.54129	2.15721	1.66468	2.32338	1.63781	1.66866	1.84677	1.82786	1.43483	2.86766	1.79502	1.97512	1.78607	1.59602
ILMN_1651378	AUP1	2.98109	2.5592	1.78607	3.01095	2.60896	2.90846	4.18806	3.23682	3.30547	1.88259	2.5393	3.54129	2.26269	2.41194	2.41592	3.86766
ILMN_1680955	AURKA	1.34428	1.30249	1.11144	1.30448	1.2199	1.22289	1.93731	1.29751	1.87562	1.30846	1.26866	1.68159	1.17612	1.3403	1.36915	1.75323
ILMN_2357438	AURKA	1.2408	1.18706	0.997015	1.1194	1.22786	1.09154	1.68458	1.20398	1.57114	1.06965	1.09552	1.31244	1.02786	1.0597	1.21393	1.67065
ILMN_1768396	AURKAIP1	54.0826	44.6169	34.2617	44.1005	38.6199	38.6637	41.1592	40.7493	46.4886	42.4149	39.594	59.8249	38.6657	51.1662	41.2766	42.1104
ILMN_2053650	AURKAPS1	0.925373	0.952239	1.02687	0.981095	0.941294	0.969154	1.21294	1.06169	0.985075	1.01493	0.898507	0.949254	0.825871	0.882587	0.935323	1.12836
ILMN_1684217	AURKB	1.16617	1.10846	1.03781	0.928358	1.12338	1.12139	1.39801	1.05075	1.88756	1.13333	1.07164	1.40995	1.01891	1.11841	1.21294	1.46567
ILMN_1721333	AURKC	0.956219	0.886567	0.829851	0.907463	0.800995	0.831841	1.26368	0.800995	0.80995	0.754229	0.791045	0.922388	0.853731	0.909453	0.793035	1.07562
ILMN_1675376	AURKC	0.881592	0.842786	0.911443	0.905473	0.903483	0.823881	1.11144	0.779104	0.793035	0.859701	0.855721	0.931343	0.756219	0.820896	0.858706	1.01393
ILMN_2350296	AURKC	0.98607	0.98806	0.878607	1.00796	0.913433	0.877612	1.34328	0.932338	0.993035	0.958209	1.01194	0.935323	0.916418	0.901493	0.830846	1.12935
ILMN_1749081	AUTS2	4.89453	3.4597	1.34627	2.57114	3.18109	4.26866	4.44279	2.31841	2.89055	1.69851	2.66667	4.16816	2.15224	3.00697	2.47463	3.71741
ILMN_1710216	AVEN	1.22786	1.18408	1.05174	1.11343	1.09652	1.201	1.31741	1.04677	1.19701	0.931343	1.01891	1.19602	1.05572	1.19701	1.15423	1.32935
ILMN_1674265	AVIL	1.64776	1.46567	1.31642	1.75423	1.42388	1.47562	1.70448	1.22289	1.64179	1.4597	1.3005	3.00896	1.18905	1.63781	1.40697	1.80199
ILMN_2230117	AVP	1.1194	1.03682	1.10448	1.01393	1.06667	1.04478	1.57711	1.15124	1.04876	1.10249	0.929353	1.10149	0.913433	1.0398	1.03383	1.25572
ILMN_1671731	AVPI1	1.31642	1.3602	0.960199	1.199	1.67562	1.34826	1.38607	1.20299	1.15522	1.03781	1.0806	1.4398	1.03284	0.973134	1.19801	1.48955
ILMN_1712159	AVPR1A	0.885572	1	0.926368	0.936318	1.0806	0.891542	1.23284	0.916418	0.922388	0.866667	0.783085	0.995025	0.843781	0.883582	0.909453	1.15522
ILMN_1680521	AVPR1B	0.997015	0.944279	0.933333	0.920398	0.897512	0.899502	1.84279	0.914428	0.926368	0.915423	0.835821	0.776119	0.781095	0.877612	0.839801	1.38607
ILMN_1698324	AVPR2	1.14328	1.03881	0.969154	0.949254	1.07363	1.04677	1.89353	1.04577	1.06269	1.00199	1.00697	0.967164	0.875622	0.9801	1.00597	1.5801
ILMN_1766185	AXIN1	8.7592	8.18408	5.2209	10.3891	8.06667	10.4806	9.30647	7.36318	9.94627	7.32239	9.64378	15.6637	6.65672	7.54826	8.58408	9.12935
ILMN_1692967	AXIN1	1.0398	0.970149	0.98806	1.07562	1.01194	0.877612	1.96716	0.935323	1.24378	1.07065	0.941294	1.21791	0.879602	0.934328	0.896517	1.76517
ILMN_1724480	AXIN2	2.71244	1.92338	1.22289	2.21791	1.80597	1.97413	2.40697	2.91045	2.43881	1.62587	1.44677	2.82189	2.17413	1.46269	1.76617	2.09453
ILMN_1701877	AXL	1.00995	0.889552	0.981095	1.06169	0.933333	0.926368	1.27065	1.02786	0.974129	0.900498	0.858706	0.902488	0.797015	0.99005	0.991045	1.1204
ILMN_2364521	AXL	1.05373	0.99801	0.836816	1.14328	0.956219	1.01891	1.32637	0.860697	0.897512	0.934328	0.789055	1.03284	0.916418	0.834826	0.838806	1.15124
ILMN_1703123	AXUD1	14.5403	11.2687	9.14229	14.7592	10.402	11.7771	14.8607	12.2199	9.3791	14.7393	12.808	21.3144	10.8428	12.6498	10.998	15.5891
ILMN_1797154	AZGP1	0.972139	1.0209	1.17711	1.15224	1.02289	0.970149	2.15821	1.20796	1.06169	0.995025	0.936318	1.11244	0.887562	1.03781	0.976119	1.65174
ILMN_1746206	AZI1	3.3005	3.33035	2.03682	2.999	2.61194	3.0209	2.9393	3.10348	3.74527	2.30348	2.74726	3.48856	2.5194	2.69254	2.61692	2.94726
ILMN_1742262	AZI1	1.14925	0.917413	0.951244	0.914428	1.13532	0.907463	2.14229	0.962189	0.997015	0.880597	0.78607	1.00796	0.915423	1.01095	0.991045	1.6995
ILMN_1733680	AZI2	1.93831	1.75224	1.31542	3.10846	1.73035	2.65871	2.88458	1.87562	1.97413	1.64776	1.5801	3.10249	1.8995	1.92836	1.66766	2.44876
ILMN_1656682	AZIN1	12.9005	7.75622	7.8199	11.5353	8.33035	13.2507	13.6597	8.87861	11.6398	8.61891	10.5731	23.2109	9.66169	12.194	9.84378	12.8547
ILMN_1704550	AZIN1	1.06766	0.989055	1.16418	1.32438	1.02786	1.47463	1.43582	0.877612	0.99005	1.16219	0.838806	1.14428	0.975124	0.983085	0.978109	1.40796
ILMN_2327994	AZIN1	1.87164	1.01294	1.4398	1.47065	1.34428	1.60995	1.71741	1.01095	2.39204	1.49652	1.35124	2.85572	1.30547	1.8408	1.58408	1.69851
ILMN_1730867	AZU1	2.09851	5.30249	3.16915	1.10647	2.53234	1.54428	2.44279	2.20398	10.0458	1.2	2.81493	2.87065	1.31045	1.60199	8.28856	2.20597
ILMN_2148459	B2M	237.347	174.319	166.305	193.519	173.189	184.378	204.874	188.481	207.116	190.987	165.714	229.942	179.898	188.583	197.923	219.897
ILMN_1787595	B3GALNT1	1.001	1.09254	0.879602	0.893532	1.03483	0.938308	1.48557	0.869652	1.01592	0.948259	0.861692	0.995025	0.867662	0.957214	0.935323	1.25871
ILMN_2325347	B3GALNT1	1.13234	0.946269	0.974129	0.955224	0.939303	0.922388	1.31642	0.962189	0.953234	0.974129	0.933333	0.965174	0.872637	0.99602	0.921393	1.23483
ILMN_1726840	B3GALNT1	1.05274	0.918408	0.957214	1.01493	0.965174	0.997015	1.83582	0.939303	0.98209	0.969154	0.839801	0.98209	0.841791	1.04876	0.935323	1.71144
ILMN_1780188	B3GALNT2	1.21194	0.913433	0.940299	1.07164	1.001	1.11045	1.16915	0.98806	1.02388	0.98806	0.883582	0.997015	0.824876	0.960199	0.977114	1.38109
ILMN_1659202	B3GALT1	1.32438	1.20697	1.05174	1.22189	1.15821	1.27164	1.51642	1.1403	1.24478	1.13831	0.888557	0.964179	1.07264	1.18806	1.29453	1.42786
ILMN_1709907	B3GALT2	1.11343	0.81592	0.904478	1.05274	1.00299	0.870647	1.63682	1.00597	1.02786	0.989055	0.874627	0.921393	0.865672	1.04975	0.904478	1.41692
ILMN_1815287	B3GALT3	1.001	0.908458	1.01393	0.965174	0.920398	0.943284	1.08657	0.810945	0.987065	0.964179	0.833831	0.872637	0.977114	1.05075	0.835821	1.07761
ILMN_1690682	B3GALT4	4.28756	4.35721	2.08856	4.16119	3.65871	3.28955	4.14328	3.61592	4.68756	2.92836	3.21791	4.25274	3.02985	3.73831	2.95124	3.24179
ILMN_2378654	B3GALT5	0.868657	0.972139	0.928358	0.978109	0.899502	0.914428	1.24478	0.857711	0.956219	0.954229	0.79403	0.877612	0.78209	0.903483	0.966169	1.15423
ILMN_1800713	B3GALT5	0.999005	1.07363	1.08159	1.00199	1.04876	1.07264	1.43582	1.08856	0.995025	0.938308	0.892537	0.948259	0.917413	0.883582	0.985075	1.42786
ILMN_1698756	B3GALT5	0.929353	0.80995	0.839801	0.850746	0.849751	1.06667	1.2209	0.874627	0.916418	0.891542	0.837811	0.802985	0.843781	1.04776	0.808955	1.11741
ILMN_1739749	B3GALT6	2.97413	2.69353	1.38408	2.30945	2.70647	2.43184	2.98507	3.17811	3.1204	1.90746	2.08458	2.65075	2.40398	2.68458	2.2597	2.92935
ILMN_1764813	B3GALTL	1.22886	1.10348	1.00398	1.10746	1.08657	1.11542	1.46766	1.09751	1.08756	0.979104	1.09851	1.2796	1.02488	1.30945	1.18706	1.23582
ILMN_1794072	B3GAT1	1.55124	1.50647	1.38408	1.21692	1.401	1.42786	1.67861	1.53532	1.57711	1.44378	1.27861	1.30746	1.1393	1.29751	1.3801	1.57015
ILMN_2371440	B3GAT1	1.22687	1.04876	0.856716	0.923383	1.09453	1.06667	2.4806	0.893532	1.02687	1.01294	1.02587	1.06866	0.941294	0.940299	0.98607	1.81493
ILMN_1761093	B3GAT1	1.38507	1.28259	1.07662	1.05373	1.14925	1.20796	1.39204	1.07463	1.44478	1.26269	1.5791	1.26269	1.12637	1.00498	1.2597	1.48159
ILMN_1774208	B3GAT2	0.960199	0.837811	0.877612	0.8	0.905473	0.877612	1.16219	0.917413	0.869652	0.799005	0.869652	0.944279	0.812935	0.835821	0.951244	1.06468
ILMN_2210581	B3GAT3	2.35124	2.73234	1.2607	2	2.37612	1.90647	2.07562	2.43582	2.69154	1.75622	2.2199	2.23682	1.79303	2.20697	2.14229	2.4199
ILMN_1711102	B3GNT2	1.28756	1.07065	1.22886	1.79005	1.25572	1.88955	1.29254	1.18109	1.09353	1.1194	0.978109	2.20697	1.26269	1.10647	1.3005	1.31642
ILMN_1800082	B3GNT3	1.16219	0.877612	1.08557	1.01692	1.09154	1.31045	2.12736	1.03184	1.12836	1.14527	0.797015	1.07662	0.781095	0.935323	1.0796	1.68657
ILMN_1771260	B3GNT4	1.05373	1.09353	0.915423	0.910448	1.02985	0.887562	1.94328	0.941294	1.00299	0.9801	0.845771	1.00995	0.941294	1.00299	0.890547	1.5602
ILMN_1702609	B3GNT5	1.04577	0.958209	0.958209	1.02289	0.98607	1.17811	1.26169	1.00896	1.0408	0.889552	0.931343	1.51443	0.802985	1.0806	1.07065	1.18507
ILMN_1715384	B3GNT6	1.19104	1.12836	1.01194	1.03682	1.17015	1.05373	1.12139	1.09751	1.25771	1.10149	0.999005	1.36517	1.07264	1.01891	1.18109	1.11841
ILMN_1680081	B3Gn-T6	0.938308	1.04577	0.857711	0.928358	1.03682	0.958209	0.99204	0.864677	1	0.919403	0.764179	1.04677	0.764179	0.929353	0.81791	1.12239
ILMN_1721523	B3GNT7	0.922388	0.956219	0.99602	0.987065	0.962189	0.886567	1.38209	0.844776	0.932338	0.897512	0.859701	0.878607	0.844776	0.802985	0.899502	1.24378
ILMN_1741389	B3GNT8	1.81194	1.53234	1.35622	1.5393	1.51144	1.66766	2.04577	1.74428	1.4607	1.48458	1.64677	1.84478	1.29751	1.83682	1.48557	1.8806
ILMN_1783908	B3GNT9	1.0408	0.968159	0.920398	0.827861	0.98408	0.896517	1.22189	1.02488	0.952239	0.890547	0.857711	0.989055	1.02786	0.825871	0.896517	1.06866
ILMN_1702817	B3GNTL1	2.08358	2.2	1.44677	1.96617	1.97612	1.80498	2.0995	1.49353	1.799	1.57015	2.90647	2.86766	1.7005	1.91741	1.75721	2.33333
ILMN_1805725	B4GALNT1	1.13234	0.957214	1.03582	0.857711	0.941294	0.834826	2.44179	1.0607	0.874627	0.962189	0.849751	1.01692	0.900498	0.983085	0.888557	1.7791
ILMN_1707200	B4GALNT2	0.964179	0.822886	0.99801	0.812935	0.895522	0.820896	1.27861	0.904478	0.901493	0.80796	0.80796	0.914428	0.779104	0.927363	0.951244	1.21592
ILMN_1753271	B4GALNT3	0.878607	0.827861	0.893532	0.818905	0.81194	0.865672	1.15124	1	0.847761	0.830846	0.797015	0.730348	0.697512	0.732338	0.793035	1.08955
ILMN_1796663	B4GALNT4	0.810945	0.81393	0.80796	0.874627	0.923383	0.905473	0.973134	0.883582	0.866667	0.735323	0.757214	0.869652	0.802985	0.818905	0.769154	0.987065
ILMN_1766221	B4GALT1	4.9791	4.06965	2.64677	3	4.10746	3.21095	5.22886	3.95124	4.40299	3.14627	3.31443	4.45572	3.33731	4.84279	3.47164	4.57612
ILMN_1680732	B4GALT2	0.956219	0.99204	1.08955	1.00498	1.02985	0.987065	1.14527	0.968159	1.04577	0.876617	0.852736	1.06965	0.932338	1.00199	0.971144	1.1403
ILMN_1806508	B4GALT2	1.08458	1.09154	1.03483	1.0597	1.05771	1.18209	1.39701	1.08259	1.03383	1.11045	0.924378	1.03582	1.01891	1.13333	1.08856	1.6398
ILMN_1753755	B4GALT2	1.03881	1.02189	1.12935	1.08756	1.02786	0.946269	3.27463	0.966169	1.1791	0.975124	0.905473	1.2398	0.954229	0.98408	1.18607	2.86567
ILMN_1692267	B4GALT3	12.805	9.43184	7.4806	8.86269	9.95025	10.998	11.1025	10.3005	11.6	9.92338	11.1851	17.7443	10.9443	10.81	9.25274	12.7134
ILMN_1661500	B4GALT4	2.38905	2.18109	1.34925	2.04179	2.0796	2.14527	3.21194	2.34428	2.96517	1.60896	1.55124	2.83881	1.77413	1.95025	2.11343	2.87562
ILMN_2380688	B4GALT4	1.23582	1.09851	1.15721	1.26468	1.24179	1.35323	1.49552	1.28657	1.42985	1.23085	0.962189	1.37313	1.22388	1.15721	1.29751	1.44776
ILMN_1685824	B4GALT5	18.0338	13.1791	13.3861	16.6269	10.7831	23.2637	18.5781	8.49055	15.0159	16.5861	23.5095	38.5403	11.2905	18.0338	13.2358	19.5751
ILMN_1732555	B4GALT6	0.911443	0.824876	0.859701	0.899502	0.877612	0.972139	1.29552	0.861692	0.899502	0.80597	0.787065	0.8199	0.828856	0.877612	0.874627	1.19005
ILMN_1663541	B4GALT7	4.21592	3.63383	2.06368	3.93333	3.34826	3.70647	3.87861	3.62985	4	2.45871	2.83582	5.0806	3.17015	2.79602	2.84677	3.68856
ILMN_1806999	B9D2	4.59701	3.66368	3.43881	3.32438	4.2597	3.65274	4.70846	3.22985	3.43284	3.93035	3.30746	4.87065	2.83881	3.96816	3.40498	5.4806
ILMN_1687751	BAALC	1.14527	1.18408	1.02886	1.11244	1.0398	1.17711	1.60796	0.975124	1.05274	1.08159	1.0995	1.10846	0.928358	0.931343	1.01194	1.52338
ILMN_1707717	BAALC	0.888557	0.921393	0.899502	0.897512	0.936318	0.883582	1.19403	0.901493	0.866667	0.820896	0.897512	1.02985	0.830846	0.802985	0.99403	1.30547
ILMN_1771308	BAAT	0.874627	0.843781	0.918408	0.78209	0.850746	0.842786	1.56418	0.902488	0.7801	0.889552	0.747264	0.858706	0.833831	0.80398	0.828856	1.48955
ILMN_2320349	BACE1	1.09254	0.954229	1.02587	0.99204	1.04577	0.981095	1.22786	0.951244	1.06866	1.06468	0.944279	1.02687	0.850746	1.03383	0.985075	1.26169
ILMN_1797804	BACE1	1.06468	0.920398	0.844776	1.04279	0.927363	1.05373	2.20199	0.957214	1.05174	0.943284	0.845771	0.907463	0.931343	0.910448	0.908458	1.56517
ILMN_2326712	BACE2	1.15124	1.03881	1.15224	1.399	1.10945	1.29453	1.92736	1.69154	1.24876	1.18109	0.901493	1.52935	1.15025	1.12239	1.17512	1.86567
ILMN_1669323	BACE2	1.18209	1.13831	1.05274	1.21493	1.24478	1.11741	1.27164	1.37711	1.38706	1.06766	0.940299	1.2806	0.975124	1.12836	0.987065	1.63582
ILMN_1807181	BACH1	1.22488	1.13234	1.2199	1.35622	1.15224	1.40199	1.61692	1.17015	1.32836	1.17015	1.15224	1.31144	1.13433	1.21891	1.12338	1.35622
ILMN_1681583	BACH1	0.922388	0.930348	0.978109	0.823881	0.945274	0.948259	1.24577	0.824876	0.927363	0.838806	0.771144	0.934328	0.79801	0.903483	0.785075	1.29751
ILMN_1751149	BACH1	0.924378	0.770149	0.842786	0.859701	0.848756	0.899502	1.50846	0.882587	0.869652	0.893532	0.924378	0.983085	0.886567	0.951244	0.848756	1.27861
ILMN_1659943	BACH2	1.10348	1.00697	1.1393	1.20199	1.06766	1.12338	1.25871	1.00299	1.16318	1.02886	0.945274	1.00597	0.907463	1.03085	1.11741	1.08259
ILMN_2058468	BACH2	2.5602	1.73333	1.11741	2.36816	1.82488	1.87662	3.11542	2.45274	2.02687	1.53433	1.40299	3.12438	1.799	1.74925	2.05274	2.2806
ILMN_1685398	BAD	1.10746	0.973134	0.908458	0.865672	0.893532	0.911443	1.50547	1.00995	0.941294	0.993035	0.867662	0.944279	0.830846	0.954229	0.886567	1.24677
ILMN_1738652	BAD	3.36816	3.16517	1.99502	2.34428	2.95522	2.55522	3.21095	2.72139	2.97413	2.54328	2.32537	3.38209	2.61592	3.11841	2.27662	2.98109
ILMN_1720360	BAD	0.914428	0.952239	0.922388	0.950249	0.928358	0.881592	1.13333	0.884577	0.960199	0.851741	0.871642	0.926368	0.894527	0.910448	0.854726	1.1005
ILMN_1733970	BAG1	1.23085	1.15224	1.1602	1.29552	1.2199	1.36617	1.6209	1.11841	1.20796	1.23881	0.944279	1.57612	1.18209	1.16617	1.27662	1.46468
ILMN_1659766	BAG3	2.35721	1.87861	1.17114	2.20199	1.67065	2.4398	2.04478	2.24776	2.10846	1.43383	1.50547	2.24975	1.85871	1.41294	1.80498	2.00398
ILMN_2221014	BAG4	1.22587	1.09851	1.13532	1.34229	1.18806	1.17413	1.55522	1.09652	1.15224	1.23284	1.10348	1.42687	1.08856	1.04279	1.15522	1.35224
ILMN_2361695	BAG5	8.19303	6.89154	4.50547	6.93333	7.25871	7.80995	7.84876	6.65174	8.27065	5.47264	6.34229	13.6905	6.54328	7.89154	6.65672	7.51244
ILMN_2268855	BAG5	0.956219	0.953234	0.993035	1.03682	1.06965	0.891542	1.10547	1.01194	1.14229	0.959204	0.793035	1.06567	0.933333	0.880597	0.943284	1.45075
ILMN_1751396	BAG5	0.821891	0.897512	0.847761	0.854726	0.857711	0.863682	1.42388	0.763184	0.871642	0.748259	0.746269	0.947264	0.79204	0.830846	0.785075	1.2796
ILMN_1728514	BAG5	1.85771	1.57214	1.24478	1.65473	1.50746	1.92139	1.74527	1.47164	1.59005	1.30149	1.27662	2.42488	1.52239	1.47463	1.52438	1.64776
ILMN_1768994	BAGE	1.16517	1.01294	1.07761	1.16318	1.1403	1.15124	1.73035	1.32637	1.07662	1.0995	0.802985	1.17015	1.0398	1.05174	0.98209	1.76617
ILMN_2168766	BAGE2	1.16418	1.001	0.912438	0.859701	1.08557	0.949254	1.22786	1.14328	1.08756	0.918408	0.851741	1.22189	0.938308	0.929353	0.948259	1.29254
ILMN_2069267	BAGE3	1.11144	0.98806	0.924378	0.989055	0.938308	1.11841	1.79104	1.0796	0.99801	0.965174	0.891542	1.08955	0.847761	0.931343	0.942289	1.36318
ILMN_2138135	BAGE4	0.959204	0.814925	0.865672	0.910448	0.918408	0.930348	1.06567	0.958209	0.98209	0.965174	0.715423	0.80398	0.874627	0.871642	0.923383	0.960199
ILMN_2206141	BAGE5	1.55025	1.47463	1.24876	1.35124	1.24975	1.50945	1.31343	1.44577	1.55821	1.33731	1.42488	1.83383	1.38706	1.55224	1.27363	1.26269
ILMN_1739256	BAHD1	1.11244	1.0796	0.972139	0.927363	1.14726	0.942289	1.9204	1.16716	0.954229	0.856716	0.851741	1.06269	0.949254	0.904478	1.05871	1.70149
ILMN_1729529	BAI1	1.08159	1	1.06766	1.04577	0.900498	0.974129	1.1602	1.06667	1.05672	1.04876	1.00398	1.02388	0.927363	1.09055	1.06169	1.24577
ILMN_1797130	BAI1	1.12438	0.995025	0.961194	1.07861	1.15522	0.99801	1.24577	0.903483	0.955224	1.05672	0.940299	1.07363	0.987065	1.12338	1.00199	1.1801
ILMN_1763869	BAI1	0.891542	0.8199	0.881592	0.938308	0.940299	0.976119	1.11542	0.814925	0.848756	0.907463	0.818905	0.878607	0.858706	0.908458	0.844776	1.11045
ILMN_1773109	BAI2	0.835821	0.892537	0.831841	0.821891	0.991045	0.787065	1.2995	0.724378	0.742289	0.806965	0.79204	0.971144	0.783085	0.791045	0.902488	1.21294
ILMN_1671076	BAI3	0.910448	0.827861	0.79005	0.774129	0.876617	0.933333	1.02687	0.78408	0.923383	0.823881	0.793035	0.80597	0.761194	0.80995	0.80597	1.04677
ILMN_1705922	BAIAP2	1.79502	1.77512	1.60299	1.74328	1.56617	1.51244	1.75622	1.62687	1.76816	1.44876	1.40597	2.03483	1.24677	1.67861	1.69055	1.65274
ILMN_2258749	BAIAP2	1.0597	1.05771	1.06269	1.02488	1.20299	1.24975	1.201	1.0607	1.13234	1.08259	1.05174	1.27264	1	0.935323	1.09552	1.09652
ILMN_1699727	BAIAP2	1.12139	1.03483	0.989055	0.99602	1.12935	0.997015	1.34229	0.840796	0.924378	0.957214	1.03184	1.04776	1.01294	0.977114	0.909453	1.31045
ILMN_2247226	BAIAP2	0.903483	0.852736	0.880597	0.876617	0.871642	0.882587	1.40199	0.868657	0.946269	0.897512	0.833831	0.851741	0.851741	0.935323	0.860697	1.2995
ILMN_1703593	BAIAP2L1	0.828856	0.900498	0.837811	0.876617	0.970149	0.911443	1.38905	0.851741	0.758209	0.8	0.810945	0.899502	0.827861	0.830846	0.854726	1.16816
ILMN_1771652	BAIAP2L2	1.14428	1.27761	0.991045	1.52935	1.24677	1.39403	1.43184	1.2	1.43085	1.12438	1.25274	1.31542	1.05871	1.07861	1.27065	1.39602
ILMN_1810550	BAIAP3	0.857711	0.98607	0.853731	0.822886	0.916418	0.921393	1.24975	0.966169	0.874627	0.932338	0.867662	0.903483	0.775124	0.806965	0.837811	1.00299
ILMN_1805990	BAK1	1.97413	1.91841	1.12338	1.90448	1.62786	1.82687	3.37711	1.80199	2.35025	1.53333	1.19005	1.93632	1.38308	1.48756	1.8199	2.6398
ILMN_1691410	BAMBI	1.0408	0.858706	1.16617	1.27562	1.61294	1.21294	1.35522	2	1.2995	1.20796	0.946269	2.06468	0.799005	1.20597	1.33532	1.54428
ILMN_2179837	BANF1	16.7353	15.808	6.35124	17.9483	13.3602	11.1473	13.4338	12.3274	16.3841	11.5104	10.0776	16.3254	12.3771	13.2259	13.4567	12.5751
ILMN_1805823	BANF2	1.16119	1.1194	1.06766	1.04876	1.17214	1.01095	1.28458	1.08358	1.06965	0.946269	0.839801	0.850746	0.938308	0.962189	0.932338	1.57114
ILMN_1661646	BANK1	8.05473	3.17711	2.70647	5.63085	3.27761	5.0209	7.25075	5.05075	3.79005	3.90249	2.48955	8.8	5.92935	4.39801	3.35323	5.1393
ILMN_2396338	BANP	1.86766	1.88657	1.64776	1.85871	1.70249	1.6209	1.9005	1.56816	1.62189	1.56119	1.95423	2.60299	1.53731	1.7005	1.54627	1.64279
ILMN_1768363	BAP1	2.599	2.31244	1.71542	1.92139	2.22886	2.42886	2.91841	2.26169	2.38905	1.88557	2.31642	2.96716	1.76816	2.21294	1.99104	2.84677
ILMN_1782004	BAPX1	0.999005	0.939303	0.960199	0.934328	0.98209	0.923383	1.12637	0.858706	0.885572	0.877612	0.892537	0.860697	0.836816	0.917413	0.896517	1.05871
ILMN_2074258	BARD1	2.35423	1.95821	1.31045	1.94229	1.78806	1.50746	2.33234	2.81692	3.36915	1.66766	1.79005	3.01493	1.88458	2.21692	2.43284	2.47861
ILMN_1737662	BARHL1	0.916418	0.781095	0.929353	0.98408	0.900498	0.913433	1.19502	0.908458	0.850746	0.886567	0.810945	0.877612	0.874627	0.914428	0.942289	1.11144
ILMN_1706493	BARHL2	1.12736	0.931343	0.939303	0.952239	1.01393	1.03682	1.94129	0.875622	1.01791	0.938308	0.820896	0.99005	0.754229	0.974129	0.904478	1.68955
ILMN_1772312	BARX1	0.991045	0.886567	0.931343	0.853731	0.99403	0.965174	1.5403	0.793035	0.960199	0.895522	0.787065	0.958209	0.799005	0.896517	0.886567	1.33333
ILMN_1701170	BARX2	1.0607	1.13333	1.12935	0.962189	1.0995	1.0607	1.28856	1.03085	0.930348	0.917413	0.866667	0.999005	0.800995	0.938308	0.906468	1.2597
ILMN_1651826	BASP1	147.944	109.247	75.7194	66.2199	72.4617	101.21	181.186	73.8945	80.5602	135.961	144.011	189.469	60.2498	139.212	96.9731	214.432
ILMN_1686626	BAT1	18.8796	19.6119	7.37413	17.9065	16.6826	13.6279	28.61	23.4677	27.3104	12.401	22.4507	25.5502	15.6955	20.1592	19.9174	29.8478
ILMN_1690576	BAT1	1.07164	0.941294	0.926368	0.846766	0.916418	0.899502	1.16816	0.866667	0.822886	0.891542	0.80597	0.874627	0.896517	0.882587	0.863682	1.22189
ILMN_2357976	BAT1	1.23682	1.05473	0.918408	1.07164	1.35025	1.11343	1.49751	1.23881	1.17015	1.0408	0.957214	1.05672	0.913433	0.976119	0.928358	1.75721
ILMN_2408179	BAT2	5.36219	6.46567	3.02886	3.09055	4.82289	3.85871	3.30846	3.88458	4.6806	4.2398	5.65672	6.99502	3.6796	4.80398	4.27065	3.44478
ILMN_1760563	BAT2	6.06269	6.63184	2.69154	3.80299	3.83582	3.88856	4.24876	5.40896	5.18209	4.49851	6.05274	5.95124	3.33234	5.23383	5.27562	4.86766
ILMN_1743137	BAT2D1	6.66169	3.99502	3.55224	7.90945	4.06269	7.01294	6.64179	5.42985	5.41194	4.57313	5.78706	16.2796	5.30448	5.53134	5.85075	5.41493
ILMN_1705364	BAT3	5.3801	4.0199	4.49851	5.05075	3.55124	5.42388	3.62189	4.22687	3.91443	5.2	3.66468	9.55423	3.70547	5.16418	3.9204	4.36219
ILMN_2390416	BAT3	6.48358	6.42189	5.72239	6.9204	4.81493	6.09453	8.18109	7.20597	7.13333	7.09552	6.67761	11.2756	5.31244	7.6597	6.43085	10.2537
ILMN_1742782	BAT4	1.2209	1.04378	1.00299	1.12836	1.03284	1.03781	1.36617	1.26965	1.1602	1.02488	0.849751	1.22587	0.971144	1.10846	1.20597	1.54627
ILMN_2152402	BAT5	8.19701	6.4398	4.71841	6.39303	6.28259	6.8796	7.8	6.11045	6.69254	5.55821	6.96617	10.1234	4.82985	6.73035	5.87861	6.99005
ILMN_1668822	BATF	4.83483	3.59005	2.1194	3.41194	3.39104	3.69851	3.90547	3.55224	4.82587	2.81791	3.17015	4.37114	3.1005	3.10746	3.70945	4.21891
ILMN_1690241	BATF2	1.35323	1.16617	1.16617	1.84179	1.25075	1.33234	1.61891	1.2995	1.48259	1.29552	1.00995	1.43383	1.26468	1.19403	1.31244	1.56716
ILMN_1763207	BATF3	1.38408	1.42886	1.24378	2.18706	1.38905	1.63483	1.72935	1.45672	1.81592	1.70647	1.04776	1.91144	1.26269	1.42786	1.401	1.63184
ILMN_2321064	BAX	7.24179	8.31343	4.25572	5.90945	7.98109	4.53333	6.72338	7.62886	9.07264	7.28657	6.65174	6.38308	5.34925	7.29055	6.6408	6.39801
ILMN_2258383	BAX	1.05473	0.953234	0.947264	1.0796	0.932338	1.0995	1.87861	1.06468	1.13731	0.906468	0.840796	0.932338	0.864677	0.942289	0.961194	1.50149
ILMN_1683300	BAX	1.99403	1.74726	1.09254	1.10945	1.69453	1.31343	1.47662	1.29154	1.76915	1.46169	1.60796	1.37214	1.50249	1.41493	1.52736	1.89055
ILMN_1742230	BAZ1A	10.4856	7.26567	5.79104	10.9085	6.10647	10.3433	14.1662	6.29353	7.0607	6.69055	12.6428	26.0328	6.89751	7.71741	7.7592	14.6687
ILMN_1658327	BAZ1A	3.39204	2.66368	2.02786	3.03483	2.31045	2.94726	2.86866	2.84179	2.48856	2.46269	2.91144	5.64478	2.48756	2.91841	2.40896	3.12935
ILMN_1680831	BAZ1B	4.99005	4.87065	2.13433	3.09453	3.64776	2.73433	4.44876	4.42985	4.78607	2.65871	3.85572	4.91343	3.55124	3.67164	3.57214	4.12637
ILMN_1676318	BAZ2A	1.33831	1.2408	1.24577	1.27363	1.16219	1.1005	2.30348	1.31144	1.37811	1.1791	1.11045	1.20796	1.1403	1.16119	1.20299	2.0607
ILMN_1720850	BAZ2B	7.5602	5.50846	4.24677	7.66269	6.2408	7.06368	10.6945	4.66368	6.07761	5.20796	7.42886	13.1124	4.55522	7.82289	5.57612	11.0905
ILMN_1729645	BBC3	1.03483	1.09254	0.924378	1.04975	1.04179	1.0995	2.32836	1.04378	1.19204	0.870647	0.867662	0.9801	0.869652	1.00199	1.02786	1.74229
ILMN_1734929	BBOX1	1.02786	0.918408	0.942289	1.00697	0.890547	0.973134	2.02488	0.865672	0.910448	0.836816	0.823881	0.914428	0.785075	0.762189	0.845771	1.54925
ILMN_1800590	BBS1	1.5592	1.23383	1.03383	1.67463	1.42786	1.72736	1.97114	1.52935	1.66766	1.12537	1.37811	2.03582	1.37214	1.29353	1.39602	2.01194
ILMN_1741985	BBS10	1.55224	0.930348	0.954229	1.12139	1.2199	1.30547	2.65274	1.16915	1.0408	1.02488	0.873632	1.20398	1.02786	1.12935	0.918408	2.09453
ILMN_2166972	BBS12	1.29751	1.17015	1.07562	1.20199	1.09254	1.14328	1.46667	1.2209	1.2806	1.12637	0.98408	1.72438	1.1393	1.14925	1.09552	1.46866
ILMN_2230035	BBS2	2.45871	1.76517	1.35821	3.19303	2.0607	2.83284	2.83881	2.5194	2.50249	1.47264	2.2408	3.32637	2.05473	2.04975	2.02388	2.33234
ILMN_1762466	BBS4	1.50945	1.29254	0.999005	1.39701	1.28259	1.4398	1.6398	1.35721	1.40597	1.07463	1.03682	1.70448	1.08756	1.11841	1.24478	1.33035
ILMN_2299737	BBS5	1.08259	1.02687	1.001	1.06965	1.08358	1.03582	1.09552	0.99602	1.04876	0.876617	0.977114	1.02985	0.886567	1.01791	1.12637	1.16716
ILMN_1663592	BBS5	0.822886	0.932338	0.79801	0.893532	0.948259	0.772139	1.38905	0.8	0.822886	0.830846	0.79005	0.899502	0.725373	0.705473	0.843781	1.38308
ILMN_1711053	BBS5	0.933333	0.941294	0.846766	0.849751	0.871642	0.896517	1.07861	0.954229	0.837811	0.861692	0.831841	0.827861	0.901493	0.81791	0.875622	1.00697
ILMN_1703111	BBS7	0.99204	1.03184	1.00697	0.917413	0.989055	0.98209	1.32338	0.9801	0.940299	0.80995	0.930348	0.999005	1.0199	0.970149	1.01592	1.36915
ILMN_2257833	BBS7	1.2408	1.22886	1.06169	1.34925	1.21393	1.09552	1.6607	1.18308	1.27861	0.99204	1.14229	1.55224	1.13532	1.15423	1.03184	1.73433
ILMN_2377056	BBS7	0.908458	0.924378	0.939303	0.937313	0.874627	0.904478	1.00498	0.962189	0.948259	0.885572	0.922388	0.967164	0.776119	0.861692	0.849751	1.07562
ILMN_2352159	BBS9	1.23284	1.0199	1.08955	1.0408	1.13333	1.12736	1.3592	1.00498	1.09254	1.06468	0.959204	1.12537	1.01393	1.05473	1.0398	1.62587
ILMN_1745415	BBX	7.01791	4.90945	2.75721	5.95821	4.54428	5.47562	6.55821	5.31343	6.26766	3.84975	4.47164	9.65373	4.97114	5.18109	4.58308	5.49751
ILMN_1790455	BCAM	0.928358	1.03284	0.963184	0.872637	1.03184	0.873632	1.50448	0.917413	0.939303	0.936318	0.864677	0.886567	0.909453	0.967164	0.836816	1.44776
ILMN_1705653	BCAM	1.04478	0.955224	0.887562	0.829851	0.968159	0.961194	1.4408	0.923383	0.888557	0.8199	0.80995	0.838806	0.79204	0.917413	0.800995	1.20398
ILMN_2320280	BCAM	1.16816	1.09055	1.17811	1.11841	1.22786	1.21095	1.42786	1.11343	1.13433	1.16915	0.924378	1.02985	1.06965	1.26368	1.0597	1.41493
ILMN_1680300	BCAN	1.22687	1.11642	1.23284	1.19204	1.21095	1.19801	2.58507	1.31144	1.27861	1.23085	1.06766	1.52637	1.25672	1.27463	1.18408	1.90547
ILMN_2246131	BCAN	0.991045	1.2597	0.99005	1.001	1.27164	0.926368	1.25274	1.15721	0.978109	1.03582	1.02886	1.09154	0.912438	1.07363	0.888557	1.2209
ILMN_1732154	BCAN	0.828856	0.914428	0.851741	0.9801	0.911443	0.856716	1.26667	0.869652	0.958209	0.927363	0.81791	0.859701	0.777114	0.890547	0.863682	1.04378
ILMN_1697642	BCAP29	1.38109	1.16716	1.07662	1.74826	1.00697	1.88259	1.48159	1.23184	1.25473	1.25174	1.13632	2.01095	1.4	1.24876	1.24876	1.3592
ILMN_1715928	BCAP29	1.00498	0.962189	0.942289	0.98209	0.985075	1.07065	1.24378	0.957214	1.03483	0.945274	0.915423	0.99005	0.938308	0.903483	0.932338	1.22289
ILMN_1705568	BCAP29	1.02488	1.07065	0.916418	0.929353	0.913433	0.913433	1.22786	1.02786	1.04677	0.911443	0.935323	0.965174	0.868657	1.01194	0.906468	1.1204
ILMN_2342084	BCAP29	1.44876	1.12338	1.20597	1.7005	1.19502	1.96119	1.49552	1.34925	1.26965	1.08756	1.0995	1.82985	1.399	1.23881	1.16517	1.48557
ILMN_2266334	BCAP29	0.979104	1.02189	0.938308	0.927363	0.917413	0.846766	1.12935	0.866667	0.908458	0.908458	0.868657	0.957214	0.856716	0.983085	0.979104	0.976119
ILMN_1737380	BCAP29	1.59403	1.37512	1.14627	1.45274	1.44975	1.49254	2.11343	1.46866	1.2995	1.1801	1.2806	1.92139	1.39303	1.4209	1.38109	1.77114
ILMN_1812403	BCAP31	31.0498	30.1313	14.3552	18.7692	30.8269	19.4408	28.3124	27.5313	27.9692	21.8388	18.9841	33.2199	18.9413	30.4328	20.6398	31.193
ILMN_1672596	BCAR1	0.953234	0.937313	0.865672	0.933333	0.913433	0.812935	1.05572	0.854726	0.882587	0.878607	0.8199	0.932338	0.826866	0.952239	0.904478	1.23184
ILMN_1763638	BCAR3	1.12438	1.13632	0.909453	1.02985	0.955224	0.963184	1.38607	1.11343	1.08856	1.06269	0.880597	1.26667	0.948259	1.09552	0.954229	1.21891
ILMN_1733042	BCAS1	1.04577	1.04279	0.943284	0.957214	1.1393	0.977114	1.26169	0.933333	1.07861	0.974129	0.81592	1.06468	0.98408	1.02985	0.979104	1.09552
ILMN_2148452	BCAS2	0.953234	1.06468	0.859701	0.826866	0.930348	0.935323	1.88358	0.915423	1.04975	0.938308	0.802985	0.934328	0.891542	0.958209	0.939303	1.27463
ILMN_2054510	BCAS3	1.09453	1.0607	1.03483	1.04378	1.13532	1.0209	1.09353	1.00398	1.07164	1.001	1.00498	1.0995	0.991045	1.00697	1.15522	1.17214
ILMN_1808059	BCAS4	4.61791	3.52736	1.67761	3.65572	2.96119	2.47065	3.88557	4.3592	4.36617	2.05871	2.32935	3.45871	3.27761	2.4408	4.04279	3.32537
ILMN_2325506	BCAS4	5.38706	4.72338	1.92736	4.31343	3.55124	2.48657	4.47363	5.05572	5.04478	3	2.63085	3.68756	3.81791	3.13731	4.47264	4.15821
ILMN_2248912	BCAS4	1.17811	1.18706	1.39303	1.26667	1.14527	1.51741	1.29552	1.00896	1.05572	1.22189	1.0408	1.4995	1.14826	1.28458	1.13333	1.36219
ILMN_1766169	BCAT1	1.20299	1.08657	0.898507	1.23184	0.954229	1.03383	2.29154	1.00398	1.07264	1.07065	0.973134	1.04279	1.00796	1.00697	0.945274	1.5791
ILMN_1695110	BCAT2	3.40498	3.72239	1.80199	3.12537	3.41393	2.90846	3.10647	2.92637	3.201	2.53433	3.20398	4.05373	2.73035	3.13532	2.85473	2.72736
ILMN_1771966	BCCIP	3.21095	2.33731	1.74129	4.08358	2.11741	2.54428	2.90945	3.30448	3.38905	2.24378	2.15025	4.49552	2.32239	2.21592	2.67463	2.7194
ILMN_1811188	BCCIP	1.90547	1.29254	1.26667	2.09055	1.3791	2.09254	2.05373	1.53632	1.6806	1.46269	1.40995	2.64279	1.67065	1.45373	1.39502	1.78806
ILMN_1786433	BCCIP	2.0408	1.49652	1.26567	2.12239	1.7403	1.68756	2.41692	1.69055	2.01095	1.76816	1.48955	2.3791	1.87264	1.77512	1.58607	2.39005
ILMN_1758090	BCCIP	1.02289	1.03582	0.924378	0.958209	1.12637	1.01393	1.95821	1.02786	0.847761	0.935323	0.884577	0.81194	0.735323	0.896517	0.925373	1.89751
ILMN_1796113	BCDIN3D	4.17214	3.21791	1.92139	3.43881	3.01194	2.96418	3.92537	3.52637	3.76318	2.85274	2.74826	5.15124	3.61294	3.77612	3.37413	3.58408
ILMN_2176592	BCHE	1.02189	1.02786	1.09851	0.952239	1.02985	0.967164	1.62289	1	0.820896	0.890547	0.856716	0.894527	0.944279	0.98408	0.959204	1.50348
ILMN_1735979	BCKDHA	7.87065	6.02786	4.23383	7.73632	6.50149	8.33532	7.04279	7.001	8.72338	6.39104	5.9204	9.5801	6.88159	6.54328	6.39104	7.03284
ILMN_2390453	BCKDHB	1.05871	0.978109	1.05274	0.974129	1.08657	1.12537	1.36915	1.13532	0.997015	0.946269	1.02289	1.31741	1.01294	0.910448	1.0398	1.38806
ILMN_2259949	BCKDHB	0.987065	1.02985	1.07264	0.978109	1.10846	1.06468	1.3592	1.04378	1.05174	1.02289	0.870647	1.11841	1.03085	1.07363	1.06368	1.34428
ILMN_1693394	BCKDK	15.4925	12.8836	12.5313	15.6995	11.7144	16.9274	13.3801	10.0706	12.405	13.4597	14.9184	22.9373	9.70746	11.4577	11.5721	13.1294
ILMN_1716446	BCL10	1.63881	1.08557	1.56915	1.93035	1.18806	2.61493	1.56517	1.11542	1.19005	1.64478	1.17413	2.34925	1.45572	1.57612	1.34229	1.46368
ILMN_2255133	BCL11A	2.65174	1.71244	1.03483	2.04378	1.39403	1.71443	3.24378	1.80796	1.67463	1.34627	1.06368	1.80597	1.74428	1.59602	1.36517	2.49353
ILMN_1659800	BCL11A	1.47164	1.08159	1.03682	1.2597	1.08856	1.44975	1.34428	0.976119	0.965174	1.15124	0.956219	1.41493	1.33134	1.06269	1.13134	1.2796
ILMN_2342271	BCL11A	3.09652	1.9194	1.47363	2.14229	2.00796	2.22289	2.81095	1.69552	1.67562	2.34726	1.32139	2.70149	2.10448	1.87363	1.72637	2.10249
ILMN_1665761	BCL11B	11.7025	8.75323	3.63881	10.5602	8.13035	9.10945	7.99303	9.97114	12.3443	5.03383	8.54428	16.1572	10.1841	7.75025	9.90249	7.28856
ILMN_1667885	BCL11B	0.949254	0.868657	1.05373	0.935323	0.99602	0.967164	1.17015	1	0.972139	0.924378	0.873632	0.842786	0.875622	0.926368	0.945274	1.13134
ILMN_2363250	BCL2	1.0796	0.903483	0.950249	0.938308	0.954229	0.857711	1.21692	0.997015	0.882587	0.904478	0.736318	0.844776	0.954229	0.877612	0.912438	1.12637
ILMN_1701120	BCL2	1.13731	0.839801	0.823881	0.860697	0.843781	1.07861	1.5801	0.899502	1.0408	0.938308	0.80398	0.757214	0.850746	0.831841	0.791045	1.60498
ILMN_2246956	BCL2	5.64279	4.31443	2.34826	5.4209	4.45672	4.6209	7.20896	7.05075	6.94328	3.02289	3.41692	5.59701	5.48856	4.16119	4.42687	5.0398
ILMN_1769229	BCL2A1	1.4199	1.17711	1.24677	1.39204	1.13333	1.39801	2.15224	1.25075	1.38905	1.28856	1.31144	1.84776	1.27861	1.50547	1.37313	1.89254
ILMN_1654118	BCL2L1	80.9662	103.975	122.939	83.4527	88.1413	122.224	149.766	157.503	207.354	136.7	108.917	188.174	87.5114	142.939	141.292	187.72
ILMN_1742410	BCL2L1	6.63682	3.10547	9.89652	5.80597	4.74527	18.5791	3.47662	4.37313	7.54229	10.1572	2.98706	13.9124	7.27164	6.87861	6.36716	4.61493
ILMN_1749096	BCL2L10	1.00796	0.906468	0.897512	1.01493	1.00498	0.964179	1.42786	0.831841	0.863682	0.933333	0.841791	0.973134	0.853731	0.931343	0.896517	1.1801
ILMN_1766541	BCL2L11	0.999005	0.946269	0.961194	0.979104	0.975124	0.928358	1.19701	1.03184	0.99403	1.05672	0.872637	1.03682	0.834826	1.0597	0.854726	1.29453
ILMN_1774997	BCL2L11	0.927363	0.974129	0.987065	0.983085	1.04677	0.964179	1.24279	0.911443	1.01393	1.0408	0.844776	1.0209	0.861692	0.913433	0.953234	1.26468
ILMN_2359627	BCL2L11	1.11542	1.15323	1.04975	1.22289	1.09254	1.24378	1.40199	0.907463	1.16318	1.65771	1.03483	1.29751	1.12836	1.08856	1.02687	1.44776
ILMN_1731193	BCL2L12	1.15025	1.10647	1.10746	1.08756	1.3204	1.20498	1.55124	1.20498	1.15622	1.25473	1.0597	1.49254	1.20597	1.12836	1.19701	1.4806
ILMN_2396982	BCL2L12	3.78408	3.0597	2.18308	3.25373	3.24378	3.35224	3.71542	3.11443	4.07562	2.85473	3.32736	4.92736	2.79104	3.20199	2.96816	2.97214
ILMN_1752953	BCL2L12	3.50746	2.75721	2.31542	2.72338	2.48955	2.79204	3.21791	2.64179	3.03682	2.25572	2.3801	4.07363	3.06368	2.78109	2.46866	3.02587
ILMN_2181445	BCL2L13	10.4577	8.99005	7.7403	7.42985	8.21095	12.8279	8.7204	10.1891	10.6169	9.7194	7.29751	23.8438	8.9393	10.191	7.72537	10.5881
ILMN_1664235	BCL2L14	0.943284	1.0199	0.965174	0.962189	1.11741	0.946269	1.61592	0.953234	1.03582	0.842786	0.912438	1.01095	0.871642	1.001	0.928358	1.39403
ILMN_1773925	BCL2L14	1.05174	0.978109	0.936318	1.07463	1.01294	1.03881	1.86866	1.09552	1.00896	0.909453	0.894527	1.08657	0.967164	0.954229	0.971144	1.7194
ILMN_1717976	BCL2L14	1.16219	0.884577	1.00597	0.972139	1.04876	0.979104	1.26567	0.945274	1.06567	0.877612	0.854726	1.0398	0.860697	0.899502	1.03781	1.41095
ILMN_2279645	BCL2L14	0.879602	0.773134	0.81194	0.779104	0.876617	0.81393	0.999005	0.769154	0.826866	0.917413	0.81393	0.828856	0.81592	0.81194	0.822886	1.02488
ILMN_1694666	BCL2L15	0.922388	0.876617	0.871642	0.883582	0.950249	0.952239	1.25075	0.874627	0.977114	0.818905	0.893532	1.11841	0.789055	0.903483	0.896517	1.10149
ILMN_1655722	BCL2L15	0.993035	1.02786	1.0209	0.968159	1.11443	0.997015	1.13433	0.977114	1.17413	0.941294	0.975124	0.966169	0.929353	0.99801	1.10348	1.09055
ILMN_1746561	BCL2L2	1.55821	1.39502	1.20398	1.66567	1.24577	1.48955	3.26567	1.70547	1.81493	1.26468	1.16816	1.92338	1.22886	1.41791	1.28259	2.37214
ILMN_1710514	BCL3	9.27861	7.36816	6.06169	5.40796	5.6199	6.599	11.6149	3.64876	4.43483	6.57114	7.6	12.4995	4.999	6.29055	5.31841	11.9383
ILMN_1746053	BCL6	1.04876	0.924378	1.07662	1.13831	1.06667	1.30149	1.26468	1.03284	1.03582	1.01194	0.833831	1.27662	0.840796	0.934328	0.991045	1.08159
ILMN_1737314	BCL6	43.8677	34.1831	29.598	36.0378	20.0239	44.0677	44.5672	21.6279	23.8806	34.2716	49.7672	87.1841	18.79	43.6597	27.5493	43.1851
ILMN_1651285	BCL6B	1.22289	1.07562	1.13532	1.05274	1.27662	1.04577	1.38507	1.01493	1.08259	0.99204	0.831841	1.55224	1.1194	0.855721	0.950249	1.2398
ILMN_1706886	BCL7A	0.965174	1.01692	0.921393	0.963184	0.932338	0.896517	1.86965	0.856716	0.897512	0.99403	0.671642	0.907463	0.822886	0.853731	0.879602	1.75323
ILMN_1665996	BCL7A	1.12239	1.001	1.06866	0.874627	1.0995	0.972139	1.8607	0.962189	0.925373	0.958209	0.762189	0.99005	0.921393	0.902488	0.914428	1.3393
ILMN_2378081	BCL7A	1	0.895522	0.978109	0.907463	0.973134	0.899502	1.9005	0.941294	1.05672	0.855721	0.778109	0.867662	0.80995	0.845771	0.914428	1.32438
ILMN_1754199	BCL7B	2.97811	2.39602	1.8408	2.43483	2.1791	2.36517	2.36716	2.399	2.99801	2.46169	2.04677	3.08159	2.17413	2.30249	2.34129	2.1791
ILMN_2367275	BCL7B	3.42985	2.45174	2.33831	3.58209	2.5393	3.7194	3.09751	2.72637	2.85771	2.65075	2.48159	4.86965	2.81791	2.5393	2.77811	2.88955
ILMN_2371147	BCL7C	6.04776	7.23184	2.74627	5.5204	5.82587	4.48856	4.75423	5.51045	5.93333	4.42388	4.56119	6.29254	4.66169	5.6398	5.4408	4.07264
ILMN_1704452	BCL9	2.50448	2.00796	1.47065	1.74129	2.04279	2.07363	2.41393	2.12438	2.14726	1.6	1.53134	1.8408	1.52935	1.69154	2.03781	2.38507
ILMN_1743966	BCL9L	2.24577	1.97512	1.26368	1.34328	1.71343	1.51443	2.05174	1.97612	2.0209	1.24975	1.41592	1.55821	1.95721	1.29751	1.69353	1.97015
ILMN_1775192	BCLAF1	8.97413	6.08756	4.28856	9.14328	6.56517	8.72935	10.9035	7.61493	6.69254	5.44876	7.6607	16.3095	7.14229	7.34428	6.88657	9.97413
ILMN_2357272	BCLAF1	2.02388	1.34826	1.40498	2.12139	1.29552	2.51144	1.98109	1.89055	1.69254	1.44876	1.71144	4.12736	1.59602	1.66368	1.8408	1.61393
ILMN_1814686	BCMO1	0.884577	0.923383	0.771144	0.841791	0.912438	0.869652	1.24975	0.810945	0.920398	0.904478	0.770149	0.789055	0.836816	0.78806	0.732338	1.08856
ILMN_2335264	BCO2	0.887562	0.751244	0.872637	0.769154	0.877612	0.884577	0.972139	0.808955	0.837811	0.896517	0.707463	0.913433	0.830846	0.830846	0.771144	1.07662
ILMN_1773117	BCOR	3.65771	2.75025	1.75124	3.22985	2.92239	3.79104	4.03682	3.02289	3.45572	2.35522	2.86368	5.47861	3.04677	3.47861	2.82587	3.71443
ILMN_1712161	BCOR	1.12935	1.03483	0.755224	1.29751	0.840796	0.904478	1.37214	1.24179	1.08358	0.882587	1.16617	1.34826	0.901493	0.981095	1.1791	1.16119
ILMN_1676241	BCOR	1.06766	1.22388	1.04378	1.35821	1.09055	1.2607	2.31642	1.22687	1.31642	0.899502	1.01692	1.29154	1.07861	1.23682	1.20597	2.10149
ILMN_1767015	BCORL1	1.56418	1.83682	1.04378	1.33632	1.36816	1.54328	2.16617	1.25274	1.38109	1.24975	1.51045	1.85274	1.18507	1.66965	1.44876	1.9801
ILMN_1678260	BCORL2	0.987065	0.963184	0.956219	1.00498	1.04179	0.927363	1.16418	1.00199	0.965174	0.881592	0.969154	0.965174	0.875622	0.947264	0.946269	1.05771
ILMN_1670398	BCR	1.42388	1.86169	1.20796	1.12637	1.57313	1.27264	1.96119	1.35224	1.46965	1.01294	1.70945	1.67463	1.29453	1.36716	1.4199	2.0806
ILMN_1680683	BCR	1.07761	0.973134	1.05473	1.08159	1.09652	0.968159	1.21791	1.06567	1.26567	1.02587	1.06766	1.0607	0.921393	1.00995	1.01891	1.03682
ILMN_2333146	BCR	1.31244	1.13333	1.14229	1.17711	1.31741	1.28955	1.16119	1.32537	1.2806	1.2806	1.19403	1.79104	1.06169	1.06269	1.26269	1.24975
ILMN_1738529	BCS1L	1.82786	1.81891	1.35224	2.00896	1.81891	1.94925	2.20199	1.83682	2.11741	1.24577	1.74328	2.41294	1.66667	1.58109	1.96617	2.01393
ILMN_1683471	BDH1	1.0199	0.863682	0.953234	0.923383	0.965174	0.924378	2.19602	0.862687	0.99403	0.897512	0.772139	0.915423	0.808955	0.902488	0.900498	1.72338
ILMN_1677637	BDH1	0.896517	0.929353	0.942289	0.892537	0.857711	0.863682	1.31642	0.824876	0.852736	0.856716	0.888557	0.848756	0.837811	0.891542	0.918408	1.32537
ILMN_1799280	BDH1	1.08856	1.00697	0.974129	1.02388	0.9801	0.901493	1.36318	1.11244	0.978109	0.904478	0.901493	0.995025	0.905473	0.985075	0.918408	1.2
ILMN_1673360	BDH2	0.942289	0.862687	0.765174	0.850746	0.899502	0.905473	1.47562	0.808955	0.827861	0.838806	0.888557	0.973134	0.870647	0.791045	0.818905	1.15423
ILMN_1734611	BDKRB1	2.44776	2.32537	2.4398	1.7393	3.12239	2.18209	3.32637	1.67164	1.32537	2.10348	1.33831	1.47562	2.04975	2.82886	1.56119	3.33234
ILMN_1684086	BDKRB2	1.12836	0.925373	1.12239	1.00299	1.23483	1.05274	1.29751	1.04378	1.16915	0.98408	0.910448	0.80796	0.927363	0.960199	0.915423	1.48657
ILMN_1719820	BDNF	0.917413	0.868657	0.976119	1.02189	0.99602	0.897512	1.63483	0.883582	0.899502	0.906468	0.79801	0.943284	0.834826	0.932338	1.00299	1.33035
ILMN_1793988	BDNF	1.10149	1.0796	1.06468	1.04179	0.955224	1.10448	1.59602	1.02886	1.03383	1.02886	0.989055	0.932338	1.12139	1.08856	0.970149	1.49154
ILMN_1706644	BDNF	1.26965	1.05672	0.919403	0.959204	0.958209	0.912438	2.85771	0.925373	1.06567	1.00697	0.797015	0.947264	0.935323	0.898507	1.06169	2.70348
ILMN_1761910	BDNF	1.67761	1.6597	1.60896	1.18905	1.82886	1.65672	2.74328	1.31144	1.14328	1.35124	1.0199	1.17015	1.32438	1.64677	1.11542	2.54229
ILMN_1712712	BDNF	0.954229	0.791045	0.914428	0.896517	0.827861	0.959204	1.1791	0.987065	0.828856	0.823881	0.773134	0.941294	0.789055	0.755224	0.783085	1.14726
ILMN_1809543	BDNF	1.26468	1.19801	0.99801	1.10945	1.30647	0.997015	2.63383	1.07264	1.11144	1.1005	1.03184	0.961194	1.0398	1.23284	1.06169	2.41592
ILMN_1751276	BDNF	0.918408	0.911443	0.847761	0.885572	0.902488	0.979104	1.14129	0.931343	0.898507	0.862687	0.847761	0.949254	0.80398	0.824876	0.824876	1.28159
ILMN_1687149	BDP1	1.23582	1.04478	0.967164	1.08657	1.02886	1.11144	1.69353	1.30249	1.27363	0.936318	1.09254	1.33433	0.909453	1.1393	1.14328	1.4
ILMN_1744822	BECN1	4.95821	3.3204	3.23184	4.4607	3.66567	5.74527	4.59502	3.96318	4.23383	3.68159	3.92338	7.11443	3.58905	4.97313	3.66667	4.14129
[truncated: 22,528 more rows]
